# Supplementary material for: Gene Expression Variability within and between Human Populations and Implications toward Disease Susceptibility
Source: PLoS Comput Biol. 2010 Aug 26;6(8):e1000910. doi: 10.1371/journal.pcbi.1000910 (PMC2928754; doi:10.1371/journal.pcbi.1000910)
Supplement: Table S1 — The complete gene list used in this study, and their expression variability. (1.56 MB XLS) [file pcbi.1000910.s006.xls]

## Sheet: variation
GENE ID	VARIATION IN CEU	VARIATION IN YRI
NM_000014	0.0527669	0.0549925
NM_000015	0.0127367	0.0126829
NM_000016	0.0163264	0.0152297
NM_000017	0.0252736	0.030016
NM_000018	0.023849	0.015485
NM_000019	0.0265663	0.0175858
NM_000020	0.00776389	0.0114068
NM_000021	0.0193086	0.0180159
NM_000022	0.0402722	0.038735
NM_000024	0.0347371	0.0342012
NM_000025	0.0117382	0.00830568
NM_000026	0.0233609	0.0181165
NM_000027	0.0401467	0.0221569
NM_000028	0.0124306	0.0131946
NM_000029	0.0117835	0.0120426
NM_000030	0.0115842	0.00966451
NM_000031	0.0175388	0.0196729
NM_000032	0.0111571	0.00796517
NM_000033	0.013757	0.0117282
NM_000034	0.010003	0.0110757
NM_000035	0.0883629	0.0146661
NM_000036	0.0400058	0.0240646
NM_000038	0.0165434	0.0176657
NM_000039	0.0104752	0.0125393
NM_000040	0.0111981	0.00899134
NM_000041	0.0181432	0.0107174
NM_000042	0.0118907	0.00869193
NM_000044	0.0412875	0.0125524
NM_000045	0.0118031	0.0113635
NM_000046	0.0238966	0.0172822
NM_000047	0.0112438	0.0103474
NM_000048	0.039124	0.0362005
NM_000049	0.104214	0.0292954
NM_000050	0.118252	0.078682
NM_000051	0.0090836	0.0103975
NM_000052	0.0296139	0.0319785
NM_000053	0.0124666	0.015774
NM_000054	0.00912818	0.0105322
NM_000055	0.0884054	0.0267574
NM_000056	0.0318331	0.0237987
NM_000057	0.0385151	0.0258754
NM_000059	0.0281103	0.0353205
NM_000060	0.0150186	0.0141106
NM_000061	0.0154521	0.0163064
NM_000062	0.014396	0.0121186
NM_000063	0.0093455	0.010733
NM_000064	0.0151071	0.0309958
NM_000065	0.0137181	0.00940568
NM_000066	0.0129803	0.0117438
NM_000067	0.106091	0.0824467
NM_000068	0.0171351	0.0162762
NM_000069	0.00932371	0.0104668
NM_000071	0.0303619	0.0274445
NM_000072	0.0705322	0.0129113
NM_000073	0.00790564	0.0110977
NM_000074	0.0131547	0.0116217
NM_000075	0.0192661	0.0244866
NM_000076	0.0240524	0.0250389
NM_000078	0.0907235	0.0952991
NM_000079	0.0112818	0.0121617
NM_000080	0.0115969	0.0150987
NM_000081	0.0471528	0.0437772
NM_000082	0.0231725	0.0248691
NM_000083	0.0117006	0.012034
NM_000084	0.0126642	0.00968677
NM_000085	0.00985386	0.00977808
NM_000086	0.0253702	0.0261794
NM_000087	0.0126749	0.00971644
NM_000088	0.0154366	0.00868813
NM_000089	0.011758	0.0116574
NM_000090	0.0118324	0.010803
NM_000092	0.0732507	0.071009
NM_000093	0.143958	0.130192
NM_000094	0.0429	0.0444198
NM_000095	0.0153802	0.0184386
NM_000096	0.0114397	0.0123631
NM_000098	0.0155464	0.0200655
NM_000099	0.0694499	0.0472613
NM_000100	0.0323208	0.0316326
NM_000101	0.0203929	0.019158
NM_000102	0.0106829	0.00862235
NM_000103	0.0126848	0.013449
NM_000104	0.0839303	0.0854319
NM_000106	0.0123428	0.0138174
NM_000107	0.0299973	0.03815
NM_000108	0.0181955	0.0182479
NM_000109	0.0114644	0.00903887
NM_000110	0.101583	0.0600341
NM_000111	0.0121011	0.0125022
NM_000112	0.0268479	0.0306557
NM_000113	0.0245706	0.0340433
NM_000114	0.0115739	0.0130765
NM_000117	0.0285745	0.0205013
NM_000118	0.0410387	0.0374082
NM_000119	0.0138587	0.00849962
NM_000120	0.0152436	0.00909835
NM_000121	0.0242434	0.032524
NM_000122	0.0137382	0.0172927
NM_000123	0.0229628	0.0167916
NM_000124	0.0192108	0.0169551
NM_000125	0.0154371	0.0222775
NM_000126	0.0163141	0.0151144
NM_000127	0.0398289	0.0380053
NM_000129	0.138602	0.158403
NM_000130	0.0724027	0.0199535
NM_000131	0.0101914	0.00992316
NM_000132	0.0110601	0.0142382
NM_000133	0.0151055	0.0111035
NM_000134	0.0104019	0.0140946
NM_000135	0.0192031	0.0105465
NM_000136	0.0361477	0.0472461
NM_000137	0.0463431	0.0413227
NM_000138	0.0524803	0.0694528
NM_000139	0.011268	0.0104415
NM_000140	0.0263774	0.035276
NM_000142	0.0144648	0.0072749
NM_000143	0.0278011	0.0214155
NM_000144	0.0247018	0.0211564
NM_000145	0.00999485	0.00825556
NM_000146	0.0250152	0.0220556
NM_000147	0.061466	0.0558299
NM_000148	0.0124114	0.0102511
NM_000149	0.00928389	0.00955707
NM_000150	0.0194277	0.0191268
NM_000151	0.00972674	0.00791071
NM_000152	0.0357542	0.0373186
NM_000153	0.0370003	0.0304305
NM_000154	0.0397964	0.0333382
NM_000156	0.0765048	0.0539179
NM_000157	0.02706	0.0286888
NM_000158	0.0462017	0.0544927
NM_000159	0.0412978	0.0285858
NM_000160	0.0228007	0.0243295
NM_000161	0.0330646	0.0364732
NM_000162	0.0108489	0.0113593
NM_000163	0.150409	0.0560902
NM_000164	0.0168563	0.0105503
NM_000165	0.0101514	0.0110643
NM_000166	0.0115528	0.00958921
NM_000167	0.0409199	0.0442257
NM_000168	0.0103859	0.00755575
NM_000169	0.0430697	0.0418937
NM_000170	0.0677487	0.0698035
NM_000171	0.012555	0.0115457
NM_000172	0.00944703	0.00852633
NM_000173	0.0376581	0.0192205
NM_000174	0.0145744	0.0106142
NM_000175	0.0269199	0.0254014
NM_000176	0.0455938	0.0431435
NM_000177	0.0146123	0.0221227
NM_000178	0.0259077	0.0216329
NM_000179	0.0252877	0.0226648
NM_000180	0.0165405	0.010021
NM_000181	0.0305214	0.0338884
NM_000182	0.0274039	0.0265104
NM_000183	0.0158381	0.0198793
NM_000184	0.0398053	0.0107301
NM_000185	0.0289015	0.0466647
NM_000186	0.0162746	0.0112108
NM_000187	0.0105418	0.00959172
NM_000189	0.0672092	0.0519013
NM_000190	0.0278587	0.0253955
NM_000191	0.0337971	0.0405093
NM_000193	0.00948459	0.0105597
NM_000194	0.0275114	0.0273014
NM_000196	0.0122623	0.00877537
NM_000197	0.0103348	0.0109235
NM_000198	0.0107848	0.00871608
NM_000199	0.0245773	0.0261455
NM_000200	0.0129524	0.009416
NM_000201	0.0433583	0.0355687
NM_000202	0.0313419	0.0266543
NM_000203	0.0274623	0.0321509
NM_000204	0.0151361	0.00925598
NM_000206	0.0392531	0.0325499
NM_000207	0.0116106	0.0121441
NM_000208	0.0546708	0.0604482
NM_000209	0.0132553	0.0177827
NM_000210	0.0112797	0.00973457
NM_000211	0.0398304	0.0372158
NM_000212	0.0275485	0.0498381
NM_000213	0.014612	0.0102954
NM_000214	0.0453676	0.0237523
NM_000215	0.0373246	0.0328397
NM_000216	0.0372669	0.0162192
NM_000217	0.0243986	0.02489
NM_000218	0.0103274	0.00816316
NM_000219	0.0129628	0.0108442
NM_000222	0.0188412	0.0405641
NM_000223	0.0103916	0.00960331
NM_000224	0.0401398	0.0418747
NM_000226	0.0111363	0.00925383
NM_000228	0.0571563	0.0680427
NM_000229	0.0317269	0.0339252
NM_000230	0.0105742	0.00761925
NM_000231	0.011342	0.0125078
NM_000232	0.0525776	0.0466446
NM_000233	0.0163348	0.0251279
NM_000234	0.0296208	0.023354
NM_000235	0.0289303	0.0279874
NM_000236	0.012749	0.0113955
NM_000237	0.0114392	0.00817016
NM_000239	0.0116722	0.012296
NM_000240	0.0115741	0.00910222
NM_000242	0.0134915	0.0122493
NM_000243	0.00889352	0.0100082
NM_000245	0.0105645	0.01045
NM_000246	0.0375301	0.0442018
NM_000247	0.0366451	0.0338068
NM_000249	0.0263208	0.0191324
NM_000250	0.0126087	0.0150629
NM_000251	0.0270651	0.0316943
NM_000252	0.0343348	0.033555
NM_000253	0.111656	0.085164
NM_000254	0.0252311	0.0259012
NM_000255	0.0210538	0.0192604
NM_000256	0.00934591	0.00885025
NM_000257	0.0161402	0.011979
NM_000258	0.0137276	0.0106593
NM_000259	0.0331335	0.0340836
NM_000260	0.00821857	0.0105553
NM_000261	0.0138674	0.00867468
NM_000262	0.0275141	0.0255117
NM_000263	0.0237735	0.0184351
NM_000264	0.0214031	0.0214827
NM_000265	0.0343229	0.0323158
NM_000266	0.0136151	0.0133006
NM_000267	0.0127911	0.0118762
NM_000269	0.0239252	0.0221953
NM_000270	0.0358614	0.0423151
NM_000271	0.0341736	0.0363881
NM_000272	0.0118551	0.0115301
NM_000273	0.0147749	0.00908615
NM_000274	0.106405	0.0938885
NM_000275	0.0125245	0.00983048
NM_000277	0.0183205	0.0279976
NM_000280	0.0161946	0.0212823
NM_000281	0.0325663	0.0334131
NM_000282	0.0300214	0.0295926
NM_000283	0.0793487	0.064876
NM_000284	0.0233553	0.0156454
NM_000285	0.0311054	0.0208473
NM_000286	0.0135994	0.0162508
NM_000287	0.0630051	0.0525866
NM_000288	0.0285853	0.029931
NM_000289	0.0322883	0.0298909
NM_000290	0.0114423	0.0130263
NM_000291	0.0311409	0.0230941
NM_000292	0.0313292	0.0297881
NM_000293	0.0253071	0.0249589
NM_000294	0.0158036	0.0147792
NM_000295	0.0604154	0.0330323
NM_000296	0.0203818	0.0202262
NM_000297	0.0289096	0.037522
NM_000298	0.0119023	0.0110592
NM_000299	0.0145035	0.0126187
NM_000300	0.011673	0.0110842
NM_000301	0.0485365	0.02285
NM_000302	0.0393008	0.0363268
NM_000303	0.0346362	0.0547742
NM_000304	0.0101883	0.0132933
NM_000305	0.0998154	0.0832405
NM_000306	0.0107473	0.00833092
NM_000307	0.00850584	0.00966521
NM_000308	0.0367076	0.0333857
NM_000309	0.0311812	0.0285127
NM_000310	0.0196494	0.0191309
NM_000312	0.0102799	0.010251
NM_000313	0.0182401	0.0133
NM_000314	0.0258136	0.0320652
NM_000315	0.0114462	0.00928554
NM_000316	0.0165476	0.0285167
NM_000317	0.0331068	0.032472
NM_000318	0.042147	0.0259272
NM_000319	0.0270172	0.021727
NM_000320	0.0470223	0.050929
NM_000321	0.0724221	0.062621
NM_000322	0.0113102	0.0092259
NM_000324	0.0125478	0.0090009
NM_000325	0.0132543	0.0124338
NM_000326	0.0110139	0.011146
NM_000327	0.0115905	0.00960388
NM_000328	0.0439257	0.0633833
NM_000329	0.0131202	0.0128174
NM_000330	0.013613	0.0210255
NM_000331	0.0151594	0.01994
NM_000332	0.0507956	0.0410478
NM_000333	0.00929002	0.00797619
NM_000334	0.0119258	0.00958826
NM_000335	0.0105661	0.00916181
NM_000336	0.037444	0.045658
NM_000337	0.00946889	0.0110103
NM_000338	0.0103523	0.0132791
NM_000339	0.0170141	0.0273624
NM_000340	0.055894	0.00896249
NM_000341	0.0128486	0.0108941
NM_000342	0.0108237	0.0118934
NM_000343	0.0129881	0.0123598
NM_000345	0.0135148	0.0155355
NM_000346	0.081279	0.0836365
NM_000347	0.0118627	0.0114084
NM_000348	0.0090115	0.0111129
NM_000349	0.0549858	0.035709
NM_000350	0.0269268	0.0212781
NM_000351	0.0773899	0.0632547
NM_000352	0.0147674	0.0113775
NM_000353	0.0118752	0.00963863
NM_000354	0.0126206	0.00994478
NM_000355	0.0741094	0.0800834
NM_000356	0.0243559	0.0218189
NM_000358	0.092127	0.0883352
NM_000359	0.0315299	0.0262329
NM_000361	0.0186057	0.0117753
NM_000362	0.010623	0.0096692
NM_000363	0.00841304	0.0103702
NM_000364	0.0111191	0.0102787
NM_000365	0.0254405	0.026922
NM_000366	0.0178947	0.00958628
NM_000367	0.0307975	0.0267614
NM_000368	0.0319015	0.0341909
NM_000369	0.0110441	0.0122521
NM_000370	0.0106953	0.00855644
NM_000371	0.0105402	0.0107377
NM_000372	0.00784701	0.00919485
NM_000373	0.0198895	0.0199201
NM_000374	0.0255534	0.0348245
NM_000375	0.030603	0.0332147
NM_000376	0.0741331	0.0844436
NM_000377	0.0151599	0.0149625
NM_000378	0.0481044	0.0422867
NM_000380	0.0177186	0.0269885
NM_000382	0.0538294	0.028621
NM_000383	0.0151573	0.0137832
NM_000384	0.0108113	0.00839085
NM_000386	0.0255846	0.0215475
NM_000387	0.022753	0.0235327
NM_000388	0.0168047	0.0166656
NM_000389	0.0280898	0.0221157
NM_000390	0.0109757	0.0141758
NM_000391	0.029227	0.0277995
NM_000392	0.0138467	0.0152997
NM_000393	0.0410636	0.0407948
NM_000394	0.0137816	0.00884405
NM_000395	0.0183271	0.0158866
NM_000396	0.0306616	0.0207248
NM_000397	0.0684074	0.0426019
NM_000398	0.0372676	0.0326162
NM_000399	0.0707344	0.0598962
NM_000400	0.0229086	0.0162295
NM_000401	0.0274921	0.0272362
NM_000402	0.0270155	0.0339576
NM_000403	0.0340614	0.0362215
NM_000404	0.0269484	0.0204181
NM_000405	0.0491449	0.0455664
NM_000406	0.0134506	0.00715807
NM_000407	0.0385028	0.0223132
NM_000408	0.0458153	0.0403129
NM_000409	0.0122015	0.0098523
NM_000410	0.00780493	0.00998744
NM_000411	0.0122704	0.0136416
NM_000412	0.0109044	0.00849269
NM_000413	0.0105901	0.00828083
NM_000414	0.0277064	0.0302011
NM_000415	0.0113872	0.0119416
NM_000416	0.0495195	0.0442325
NM_000417	0.0566268	0.0446197
NM_000418	0.0388643	0.0391572
NM_000419	0.030947	0.0241347
NM_000420	0.00875007	0.0107243
NM_000421	0.0204756	0.0292612
NM_000422	0.0960749	0.0980532
NM_000423	0.0106854	0.0104506
NM_000424	0.0219804	0.0239837
NM_000426	0.00949018	0.0128064
NM_000427	0.0156078	0.00955898
NM_000428	0.0137783	0.00933099
NM_000429	0.0107022	0.0143179
NM_000430	0.0173314	0.0338719
NM_000431	0.0290399	0.0263743
NM_000432	0.0385974	0.0331363
NM_000433	0.0552455	0.0526049
NM_000434	0.027603	0.0309375
NM_000435	0.00963128	0.00875119
NM_000436	0.0258722	0.0300406
NM_000437	0.0223354	0.0231676
NM_000438	0.0113682	0.00879175
NM_000439	0.00988994	0.00984143
NM_000440	0.0112538	0.0120644
NM_000441	0.0249727	0.0221183
NM_000442	0.093731	0.0609322
NM_000444	0.00982675	0.0157908
NM_000445	0.0337853	0.0426553
NM_000446	0.00918579	0.0102049
NM_000448	0.0118653	0.0133316
NM_000449	0.0159626	0.0193463
NM_000450	0.0116369	0.0128404
NM_000452	0.0692991	0.0207757
NM_000453	0.00770387	0.00813816
NM_000454	0.0186695	0.0157197
NM_000455	0.0261881	0.0218876
NM_000456	0.0142251	0.0147529
NM_000459	0.0122379	0.0124405
NM_000460	0.0090493	0.00691439
NM_000461	0.0167951	0.00893495
NM_000463	0.0155164	0.0102031
NM_000465	0.031029	0.0311516
NM_000466	0.0256645	0.0192941
NM_000474	0.0130774	0.00918059
NM_000475	0.0107027	0.00889414
NM_000476	0.0413549	0.0500889
NM_000477	0.0127989	0.0117699
NM_000478	0.03827	0.015478
NM_000479	0.017831	0.0126221
NM_000480	0.0529215	0.0453271
NM_000481	0.0268886	0.0253591
NM_000482	0.0154396	0.0127314
NM_000483	0.0308829	0.0315306
NM_000484	0.13366	0.105209
NM_000485	0.0228249	0.0344375
NM_000486	0.0120369	0.0111356
NM_000487	0.0489515	0.032242
NM_000488	0.0130383	0.0131245
NM_000490	0.00888912	0.010113
NM_000491	0.0105832	0.00865261
NM_000492	0.0130351	0.0121728
NM_000493	0.0143328	0.0106109
NM_000494	0.0131068	0.0139087
NM_000495	0.0539406	0.0135685
NM_000496	0.0818025	0.0722684
NM_000497	0.0112176	0.0103816
NM_000498	0.012658	0.0123106
NM_000499	0.0746228	0.0654116
NM_000500	0.0132258	0.0112693
NM_000501	0.00930633	0.0105173
NM_000502	0.0109483	0.0103121
NM_000503	0.0128534	0.0111965
NM_000504	0.0104906	0.00933917
NM_000505	0.0605115	0.0756465
NM_000506	0.0124657	0.0112006
NM_000507	0.0335951	0.0162804
NM_000508	0.0115459	0.0110017
NM_000510	0.0122628	0.00961912
NM_000511	0.0101178	0.0103251
NM_000512	0.0259054	0.0335513
NM_000513	0.011661	0.0109558
NM_000514	0.0113472	0.00940119
NM_000517	0.0112732	0.0338635
NM_000518	0.0146609	0.010276
NM_000519	0.113476	0.0615514
NM_000520	0.0138544	0.0119975
NM_000521	0.0285396	0.0200227
NM_000522	0.0104326	0.00983941
NM_000523	0.00739386	0.00723924
NM_000524	0.0107751	0.0102505
NM_000525	0.0127047	0.00828388
NM_000526	0.0129243	0.0116656
NM_000527	0.0424604	0.0419724
NM_000528	0.0226909	0.0285041
NM_000529	0.0101437	0.0102662
NM_000530	0.020596	0.0126174
NM_000531	0.00954944	0.0103157
NM_000532	0.0229086	0.0240728
NM_000533	0.00810992	0.0110648
NM_000534	0.0320182	0.0330668
NM_000535	0.0313019	0.0289463
NM_000536	0.0128583	0.00898818
NM_000537	0.0117441	0.0109006
NM_000538	0.0105095	0.010231
NM_000539	0.0102684	0.0107897
NM_000540	0.0170066	0.0228572
NM_000541	0.0147667	0.0106511
NM_000542	0.0115001	0.0111665
NM_000543	0.0293658	0.0269021
NM_000544	0.0320362	0.0412512
NM_000545	0.0129725	0.00910088
NM_000546	0.0229392	0.0305717
NM_000548	0.00899376	0.0113184
NM_000549	0.0147663	0.011511
NM_000550	0.0137384	0.0105959
NM_000551	0.01795	0.0197857
NM_000552	0.0143103	0.0149748
NM_000553	0.0270502	0.0263035
NM_000554	0.00982947	0.0100161
NM_000555	0.0107313	0.0111701
NM_000557	0.0114526	0.0124766
NM_000558	0.0257689	0.0551381
NM_000559	0.0390532	0.0131238
NM_000560	0.0189313	0.0180057
NM_000561	0.105378	0.113228
NM_000562	0.0153217	0.0166141
NM_000565	0.0176838	0.019716
NM_000566	0.0172266	0.0156263
NM_000567	0.0139076	0.00963498
NM_000569	0.0101763	0.0108044
NM_000570	0.0135667	0.0107965
NM_000572	0.0670686	0.0693661
NM_000573	0.00791075	0.00819748
NM_000574	0.0395742	0.0447005
NM_000575	0.154285	0.116817
NM_000576	0.109346	0.0907931
NM_000578	0.0137723	0.0132591
NM_000579	0.0201208	0.0159992
NM_000582	0.029662	0.0113654
NM_000583	0.0118925	0.00910297
NM_000584	0.107116	0.0931938
NM_000585	0.0380506	0.0351267
NM_000586	0.0109224	0.00974909
NM_000587	0.0115852	0.00896691
NM_000588	0.00999482	0.00887233
NM_000590	0.0131797	0.0112596
NM_000591	0.0097047	0.00609529
NM_000592	0.0097962	0.00912319
NM_000593	0.0174004	0.0212488
NM_000594	0.0504488	0.049567
NM_000595	0.0590252	0.0534211
NM_000596	0.0100872	0.00937193
NM_000597	0.0471314	0.0668309
NM_000598	0.187152	0.0564329
NM_000599	0.0137284	0.0135827
NM_000600	0.0359407	0.0356858
NM_000601	0.0193583	0.0267424
NM_000602	0.0179535	0.0189622
NM_000603	0.0118542	0.00968823
NM_000605	0.0183658	0.0175528
NM_000606	0.0122264	0.011734
NM_000607	0.0104057	0.00962914
NM_000608	0.00877778	0.0126821
NM_000609	0.0186486	0.0191458
NM_000610	0.0437399	0.0557358
NM_000611	0.024359	0.02453
NM_000613	0.0157207	0.013877
NM_000614	0.0108909	0.0108315
NM_000615	0.0105856	0.0116048
NM_000616	0.0341602	0.0328272
NM_000617	0.0373912	0.0329652
NM_000618	0.068701	0.0644278
NM_000619	0.0703797	0.0914384
NM_000620	0.0092934	0.00951791
NM_000621	0.0169686	0.0243973
NM_000623	0.0110887	0.00910139
NM_000624	0.0106892	0.0097378
NM_000625	0.0145698	0.0132994
NM_000626	0.0589087	0.0478038
NM_000627	0.0428953	0.0155881
NM_000628	0.0238025	0.0220703
NM_000629	0.0167807	0.0201519
NM_000632	0.0802674	0.0579464
NM_000633	0.0229911	0.0352707
NM_000634	0.00998939	0.0119799
NM_000636	0.0374215	0.0230248
NM_000637	0.0269103	0.023708
NM_000638	0.0120055	0.0114315
NM_000639	0.0080927	0.00859782
NM_000640	0.0103087	0.00777868
NM_000641	0.0142386	0.0101047
NM_000642	0.01779	0.0181235
NM_000644	0.0265018	0.0264434
NM_000645	0.0130361	0.00956408
NM_000646	0.0103067	0.00905164
NM_000647	0.0759363	0.0259856
NM_000655	0.0946431	0.0894143
NM_000657	0.0447249	0.0455102
NM_000659	0.0165979	0.00746646
NM_000660	0.0126396	0.0121779
NM_000661	0.00868895	0.0160107
NM_000662	0.0212548	0.0208791
NM_000663	0.0178064	0.0131009
NM_000664	0.022551	0.0236441
NM_000665	0.0126231	0.0140578
NM_000666	0.0308965	0.0321442
NM_000667	0.0147216	0.00997268
NM_000668	0.0103498	0.00890185
NM_000669	0.0205059	0.0126387
NM_000670	0.0140305	0.00988824
NM_000671	0.0321133	0.0337583
NM_000672	0.0120105	0.0104387
NM_000673	0.0185823	0.018015
NM_000674	0.0132292	0.00885494
NM_000675	0.0316118	0.0378972
NM_000676	0.0404932	0.0335605
NM_000677	0.0167482	0.0152575
NM_000678	0.00869854	0.00988198
NM_000679	0.0103509	0.00877592
NM_000680	0.00928743	0.0105075
NM_000681	0.0132517	0.0100044
NM_000682	0.0154002	0.0112958
NM_000683	0.0126961	0.0110099
NM_000684	0.0134464	0.00997826
NM_000686	0.0101214	0.0110943
NM_000687	0.0204107	0.0227566
NM_000688	0.0347532	0.0246601
NM_000689	0.00986626	0.0119101
NM_000690	0.0747478	0.0543915
NM_000691	0.0182715	0.0387519
NM_000692	0.0446498	0.0304341
NM_000693	0.0371637	0.0631623
NM_000694	0.0125704	0.00875801
NM_000695	0.0200014	0.016201
NM_000696	0.0226665	0.0277239
NM_000697	0.0151088	0.015324
NM_000698	0.0644147	0.0632692
NM_000699	0.0244833	0.0255539
NM_000700	0.105807	0.137167
NM_000701	0.0257564	0.024326
NM_000702	0.0096004	0.00645757
NM_000704	0.0465026	0.0494541
NM_000705	0.0228375	0.0137727
NM_000706	0.0109864	0.0121447
NM_000707	0.0109244	0.0113436
NM_000709	0.0330992	0.031701
NM_000710	0.0138989	0.00953251
NM_000712	0.0356529	0.0257494
NM_000713	0.0579243	0.0515368
NM_000714	0.0617722	0.0618942
NM_000715	0.011899	0.00929985
NM_000716	0.107751	0.083361
NM_000717	0.0462419	0.0457192
NM_000718	0.0125605	0.0195601
NM_000719	0.00883155	0.0105723
NM_000720	0.0116777	0.0102965
NM_000721	0.00908785	0.0166895
NM_000722	0.0131784	0.00996698
NM_000723	0.0101292	0.00982832
NM_000724	0.0682267	0.0440958
NM_000725	0.011141	0.0105577
NM_000726	0.0657955	0.0674954
NM_000727	0.0119369	0.00885705
NM_000728	0.0128934	0.0115371
NM_000730	0.00982438	0.00969232
NM_000732	0.015839	0.0996105
NM_000733	0.0567608	0.0681804
NM_000734	0.0313835	0.0193157
NM_000735	0.0156128	0.0150104
NM_000737	0.0121507	0.00761623
NM_000738	0.01136	0.00720887
NM_000739	0.0111764	0.0105149
NM_000740	0.0107319	0.0126865
NM_000741	0.012378	0.0112311
NM_000742	0.0137785	0.0145637
NM_000743	0.0110035	0.0110372
NM_000744	0.0100595	0.0109232
NM_000745	0.0199796	0.0282375
NM_000746	0.0116147	0.0128342
NM_000747	0.022805	0.0225362
NM_000748	0.00896234	0.00923119
NM_000749	0.0134766	0.0132551
NM_000750	0.0129386	0.0133047
NM_000751	0.00941129	0.00928491
NM_000754	0.0200533	0.0343531
NM_000756	0.0118508	0.0101126
NM_000758	0.0254169	0.0133922
NM_000761	0.0145023	0.0120957
NM_000762	0.0132283	0.00947769
NM_000765	0.0133996	0.0200794
NM_000766	0.00895241	0.00778504
NM_000767	0.0101625	0.0124471
NM_000769	0.0108562	0.00945212
NM_000770	0.0151363	0.0174877
NM_000771	0.00922955	0.00845056
NM_000772	0.0121432	0.00809138
NM_000773	0.0268461	0.0337342
NM_000774	0.0114331	0.00980878
NM_000775	0.07587	0.0658576
NM_000777	0.014112	0.00799122
NM_000778	0.0104519	0.0121393
NM_000779	0.011651	0.0096842
NM_000780	0.0104369	0.0105616
NM_000781	0.0108178	0.0169862
NM_000782	0.00919084	0.00884258
NM_000784	0.0884204	0.0928672
NM_000785	0.0230085	0.0237508
NM_000786	0.0236561	0.0208304
NM_000787	0.0185758	0.00941061
NM_000788	0.0391873	0.0344336
NM_000789	0.0118896	0.0104971
NM_000790	0.0213719	0.0108739
NM_000791	0.0345722	0.0420789
NM_000792	0.013467	0.0134644
NM_000793	0.00912841	0.00927759
NM_000794	0.0101407	0.00973684
NM_000795	0.0119293	0.0108631
NM_000797	0.0150053	0.013463
NM_000799	0.0112373	0.0164893
NM_000800	0.0100627	0.0114258
NM_000801	0.0176667	0.0206253
NM_000803	0.0371864	0.0347934
NM_000804	0.00953114	0.0106243
NM_000805	0.0143534	0.0121932
NM_000806	0.0116771	0.00981793
NM_000807	0.00888194	0.0107685
NM_000808	0.0121842	0.00989716
NM_000809	0.0103604	0.00796484
NM_000810	0.00981179	0.0135187
NM_000811	0.00988891	0.00949304
NM_000812	0.0124456	0.00917365
NM_000813	0.0116633	0.0107068
NM_000814	0.0127697	0.0181992
NM_000815	0.0102294	0.0100046
NM_000816	0.0128366	0.0142098
NM_000817	0.064144	0.0511494
NM_000818	0.0182725	0.017838
NM_000819	0.024245	0.0256688
NM_000820	0.0419271	0.0515428
NM_000821	0.0144159	0.0146861
NM_000823	0.0127567	0.0180451
NM_000824	0.0114119	0.0102147
NM_000825	0.015493	0.0174006
NM_000826	0.0136619	0.0133297
NM_000827	0.0110142	0.0147367
NM_000829	0.0123359	0.0112776
NM_000831	0.0106975	0.011882
NM_000832	0.0573422	0.0613111
NM_000833	0.0262707	0.0124506
NM_000834	0.00940578	0.0080086
NM_000835	0.0122935	0.0100744
NM_000836	0.00887572	0.00973385
NM_000838	0.0130198	0.0138672
NM_000839	0.0104357	0.0109805
NM_000840	0.0693919	0.0404617
NM_000841	0.0113387	0.0126119
NM_000842	0.0149096	0.0123433
NM_000843	0.0100195	0.00656742
NM_000845	0.107582	0.0929398
NM_000846	0.0128543	0.0129359
NM_000847	0.0144975	0.00900254
NM_000848	0.0708628	0.0736729
NM_000849	0.0378357	0.0346824
NM_000851	0.0131456	0.0123467
NM_000852	0.0362412	0.0291614
NM_000853	0.152948	0.150165
NM_000854	0.0106253	0.0092666
NM_000855	0.0122041	0.0086269
NM_000856	0.141954	0.104406
NM_000857	0.155426	0.11844
NM_000858	0.0165625	0.0125466
NM_000859	0.0252333	0.038943
NM_000860	0.0267571	0.0761544
NM_000861	0.0115237	0.0121386
NM_000862	0.010321	0.0134898
NM_000863	0.0120055	0.012613
NM_000864	0.0136357	0.00918889
NM_000865	0.0118631	0.0093147
NM_000866	0.0153988	0.0133594
NM_000867	0.101889	0.0394912
NM_000868	0.0117093	0.0106304
NM_000869	0.0126354	0.0339148
NM_000870	0.00939798	0.0082174
NM_000871	0.0122768	0.0147421
NM_000872	0.00890704	0.00924771
NM_000873	0.0368954	0.0380662
NM_000874	0.021561	0.0172474
NM_000875	0.0159625	0.0118638
NM_000876	0.0282457	0.035604
NM_000877	0.111856	0.0923816
NM_000878	0.0339617	0.0246698
NM_000879	0.0106528	0.0106619
NM_000880	0.0598662	0.0746123
NM_000882	0.0608607	0.0603449
NM_000883	0.0107072	0.0102023
NM_000884	0.0258141	0.0254508
NM_000885	0.0504833	0.0371249
NM_000887	0.0701211	0.0960357
NM_000888	0.0114711	0.0109984
NM_000889	0.045073	0.0506752
NM_000890	0.00887308	0.00976353
NM_000891	0.125882	0.0105587
NM_000892	0.012839	0.0143322
NM_000893	0.0146875	0.0116296
NM_000894	0.0117642	0.0106821
NM_000895	0.0235319	0.0228234
NM_000896	0.0289466	0.038905
NM_000897	0.013176	0.0127472
NM_000899	0.0128419	0.0112447
NM_000900	0.0113437	0.0113806
NM_000901	0.0107951	0.00767177
NM_000902	0.0110495	0.0114911
NM_000903	0.0528375	0.0598764
NM_000904	0.0613167	0.0402784
NM_000905	0.106092	0.0285564
NM_000906	0.0334273	0.0542506
NM_000907	0.0124507	0.0106939
NM_000908	0.0120007	0.011271
NM_000909	0.0113937	0.0111309
NM_000910	0.0118245	0.0120448
NM_000911	0.0107977	0.00895924
NM_000912	0.0106773	0.0113296
NM_000913	0.0251821	0.0444223
NM_000914	0.0102061	0.0121771
NM_000915	0.0130244	0.0141027
NM_000916	0.0536756	0.0603378
NM_000917	0.0612798	0.0513786
NM_000918	0.0265913	0.0254337
NM_000920	0.00981334	0.00778781
NM_000922	0.0212315	0.0199151
NM_000923	0.0240882	0.0246343
NM_000924	0.0179677	0.0143773
NM_000925	0.0208888	0.0214335
NM_000926	0.0117196	0.0112222
NM_000927	0.0446693	0.0546881
NM_000928	0.0121548	0.0119881
NM_000929	0.0115099	0.0110418
NM_000931	0.0136577	0.00982995
NM_000932	0.0176026	0.0198099
NM_000934	0.0117652	0.0107847
NM_000935	0.176547	0.0734395
NM_000936	0.0110725	0.00861758
NM_000937	0.0165413	0.0251451
NM_000938	0.0138464	0.0219812
NM_000939	0.155454	0.093112
NM_000940	0.0337409	0.013743
NM_000941	0.0195092	0.0248387
NM_000942	0.0338626	0.0380009
NM_000943	0.0650859	0.0717315
NM_000944	0.0314299	0.0339819
NM_000945	0.0198661	0.0182665
NM_000946	0.0322556	0.0279584
NM_000947	0.0272041	0.0256727
NM_000948	0.129112	0.00936198
NM_000949	0.0294883	0.0246257
NM_000950	0.0148122	0.0137705
NM_000951	0.0498967	0.0710604
NM_000952	0.099539	0.06037
NM_000953	0.0124157	0.00873837
NM_000954	0.00924204	0.0107117
NM_000955	0.0113786	0.00845058
NM_000956	0.0285844	0.0526763
NM_000958	0.0171374	0.0185312
NM_000959	0.0117929	0.00991807
NM_000960	0.0331577	0.0277588
NM_000961	0.011901	0.00923866
NM_000962	0.0115517	0.00914951
NM_000963	0.0401535	0.0211375
NM_000964	0.0359514	0.0442458
NM_000966	0.0253062	0.019486
NM_000967	0.0144611	0.0125693
NM_000968	0.0101438	0.00813543
NM_000969	0.0114765	0.0108338
NM_000970	0.0101299	0.00981629
NM_000971	0.010258	0.010849
NM_000972	0.0112279	0.00979895
NM_000973	0.0143423	0.0136643
NM_000975	0.010898	0.0096146
NM_000976	0.0134495	0.0115051
NM_000977	0.0309078	0.0244129
NM_000978	0.0167371	0.011781
NM_000979	0.0108394	0.0122003
NM_000980	0.00813993	0.00898304
NM_000981	0.00733191	0.00751017
NM_000982	0.00710543	0.00988579
NM_000983	0.0212827	0.018927
NM_000984	0.0118875	0.0101541
NM_000985	0.0258612	0.0257724
NM_000986	0.00818135	0.00644647
NM_000987	0.0134537	0.0106344
NM_000988	0.0111681	0.00915051
NM_000989	0.0108203	0.0103669
NM_000990	0.0107533	0.00872183
NM_000991	0.0285654	0.0455777
NM_000992	0.0130847	0.0104686
NM_000993	0.00751534	0.00625323
NM_000994	0.00856415	0.00754116
NM_000995	0.0331535	0.0419007
NM_000996	0.0100909	0.00846288
NM_000997	0.0117466	0.0121523
NM_000998	0.00779873	0.0109535
NM_000999	0.0102237	0.00954433
NM_001000	0.00793249	0.00774568
NM_001001	0.0163827	0.0153814
NM_001002	0.0147583	0.0157012
NM_001003	0.00953351	0.0112357
NM_001004	0.0130915	0.0129556
NM_001005	0.0159475	0.0127133
NM_001006	0.00523991	0.00570034
NM_001007	0.0167848	0.0119782
NM_001009	0.0141905	0.0119573
NM_001010	0.0119713	0.0101897
NM_001011	0.00975278	0.00948778
NM_001012	0.012155	0.0118037
NM_001013	0.0132806	0.0121905
NM_001014	0.00974701	0.00880801
NM_001015	0.0295117	0.0228204
NM_001016	0.0196168	0.0145011
NM_001017	0.0098917	0.0100018
NM_001018	0.032913	0.0247497
NM_001019	0.0280115	0.024345
NM_001020	0.0171721	0.0167704
NM_001021	0.0133806	0.0122773
NM_001022	0.0104504	0.00853403
NM_001023	0.0105566	0.010098
NM_001024	0.00873559	0.00716718
NM_001025	0.00817442	0.00697289
NM_001026	0.0069046	0.00557464
NM_001028	0.0129397	0.0139916
NM_001029	0.0243675	0.0186424
NM_001030	0.00591106	0.00580234
NM_001031	0.0138025	0.0135686
NM_001032	0.0143369	0.0115567
NM_001033	0.0208891	0.0191333
NM_001034	0.065695	0.0444746
NM_001035	0.0104681	0.00967731
NM_001036	0.0366653	0.0197033
NM_001037	0.0142418	0.0158785
NM_001038	0.0125828	0.0108707
NM_001039	0.0106009	0.00993096
NM_001040	0.0104381	0.00835928
NM_001041	0.0118543	0.011584
NM_001042	0.00817043	0.0098456
NM_001043	0.0114115	0.0143354
NM_001044	0.017086	0.00775743
NM_001045	0.0996686	0.072904
NM_001046	0.0347485	0.0506324
NM_001047	0.0248923	0.0311701
NM_001048	0.0108288	0.0100338
NM_001049	0.0124523	0.0106957
NM_001050	0.0524842	0.0562415
NM_001052	0.0124197	0.00998343
NM_001053	0.0124694	0.0107483
NM_001054	0.0305655	0.0809503
NM_001055	0.0299765	0.0353065
NM_001057	0.0128854	0.00942828
NM_001058	0.0110486	0.00832763
NM_001059	0.0106543	0.0104253
NM_001060	0.010267	0.0103424
NM_001061	0.0852708	0.0675641
NM_001062	0.0132346	0.0124179
NM_001063	0.014309	0.0164746
NM_001064	0.0204567	0.0230262
NM_001065	0.0510752	0.0723621
NM_001066	0.0411291	0.0387067
NM_001067	0.0279887	0.0300666
NM_001068	0.0228028	0.026704
NM_001069	0.089891	0.0681821
NM_001070	0.0293377	0.0245977
NM_001071	0.0240619	0.0220728
NM_001072	0.0100287	0.00890299
NM_001073	0.136367	0.107413
NM_001074	0.124971	0.103257
NM_001075	0.0887359	0.0884322
NM_001076	0.00838947	0.00737637
NM_001077	0.149784	0.109062
NM_001078	0.0157706	0.0162453
NM_001079	0.0527271	0.0385374
NM_001080	0.0479197	0.0466168
NM_001081	0.0136652	0.00944808
NM_001082	0.0307199	0.0312491
NM_001084	0.0274487	0.0219741
NM_001085	0.0100439	0.00902809
NM_001086	0.00722991	0.00946425
NM_001087	0.0185468	0.0184062
NM_001088	0.0112157	0.00871335
NM_001089	0.0423158	0.0359891
NM_001090	0.0227845	0.0333525
NM_001091	0.0719659	0.010958
NM_001093	0.0137011	0.0117853
NM_001095	0.0396736	0.0305446
NM_001096	0.0174838	0.0172585
NM_001097	0.0102583	0.0104789
NM_001098	0.0222184	0.0181727
NM_001099	0.105182	0.0663305
NM_001100	0.00912318	0.0116365
NM_001101	0.00553514	0.00491327
NM_001102	0.125806	0.112843
NM_001103	0.0106173	0.0100048
NM_001104	0.0152844	0.0277436
NM_001105	0.0951968	0.055354
NM_001106	0.0555799	0.0407761
NM_001109	0.0389637	0.0399184
NM_001110	0.0270712	0.0226816
NM_001111	0.00924292	0.0130257
NM_001114	0.0298177	0.0316514
NM_001115	0.0103098	0.00865648
NM_001116	0.0206816	0.0290157
NM_001117	0.00953171	0.0115855
NM_001118	0.00924266	0.0112571
NM_001119	0.0203495	0.0177865
NM_001120	0.0427928	0.0226242
NM_001122	0.0434416	0.0431968
NM_001123	0.0300028	0.0258205
NM_001124	0.143068	0.116091
NM_001125	0.0194847	0.0262184
NM_001126	0.0234594	0.0309556
NM_001128	0.0212209	0.0254322
NM_001129	0.0654191	0.0667795
NM_001130	0.0228266	0.017432
NM_001131	0.0112687	0.0135128
NM_001132	0.0302383	0.0378023
NM_001133	0.0123674	0.0115504
NM_001134	0.0141604	0.00991043
NM_001135	0.0119016	0.0102285
NM_001136	0.0138849	0.0143778
NM_001138	0.00984831	0.00800382
NM_001139	0.0137301	0.00972837
NM_001140	0.0111687	0.0140221
NM_001141	0.0330041	0.0506167
NM_001144	0.0542355	0.0390089
NM_001145	0.0579439	0.0518076
NM_001146	0.00928061	0.0119844
NM_001147	0.0116331	0.0099019
NM_001148	0.0131639	0.00972954
NM_001150	0.0126029	0.0129754
NM_001151	0.0276317	0.0230322
NM_001152	0.0169288	0.0163778
NM_001153	0.0374521	0.0466798
NM_001154	0.0351595	0.0299159
NM_001156	0.0213362	0.0299756
NM_001157	0.0330911	0.0289128
NM_001158	0.0107638	0.0107862
NM_001159	0.0173259	0.0145526
NM_001161	0.0506878	0.0391987
NM_001163	0.00787854	0.008962
NM_001164	0.0140101	0.0145357
NM_001165	0.0431433	0.0330513
NM_001166	0.0284309	0.0246623
NM_001167	0.0221166	0.0212934
NM_001168	0.0409491	0.043081
NM_001170	0.00712726	0.00793455
NM_001171	0.00865281	0.00772057
NM_001172	0.0197877	0.024667
NM_001173	0.00875012	0.013014
NM_001174	0.0106074	0.0117425
NM_001175	0.0166178	0.0151092
NM_001176	0.0101203	0.00936719
NM_001177	0.0199911	0.0194567
NM_001178	0.0362624	0.0316563
NM_001179	0.0122387	0.0102618
NM_001182	0.103497	0.0676812
NM_001183	0.0195312	0.0184447
NM_001184	0.0205504	0.0276598
NM_001185	0.0205999	0.0139795
NM_001186	0.0397746	0.0351603
NM_001187	0.0128416	0.0106073
NM_001188	0.033818	0.0271163
NM_001189	0.00970323	0.00917848
NM_001190	0.0237732	0.0212674
NM_001191	0.0320648	0.0373889
NM_001192	0.030671	0.0416141
NM_001194	0.00931718	0.00797185
NM_001195	0.0125532	0.0111858
NM_001197	0.0755655	0.0758702
NM_001198	0.023916	0.0355327
NM_001200	0.0930998	0.0524924
NM_001201	0.0113747	0.0118606
NM_001202	0.0244236	0.014173
NM_001203	0.0110315	0.0120267
NM_001204	0.0262969	0.0313752
NM_001206	0.0647926	0.0413389
NM_001207	0.0113716	0.0112948
NM_001208	0.00948528	0.00861143
NM_001211	0.0278327	0.0399141
NM_001212	0.0176876	0.0163393
NM_001213	0.0107988	0.00813383
NM_001214	0.0143016	0.00850624
NM_001215	0.0161609	0.0158915
NM_001216	0.0360901	0.0409451
NM_001217	0.0257734	0.0211919
NM_001218	0.00904129	0.0119557
NM_001219	0.0239109	0.0284301
NM_001220	0.0115048	0.0124731
NM_001222	0.0340242	0.029249
NM_001224	0.012594	0.00954065
NM_001225	0.0227625	0.0185686
NM_001226	0.0278232	0.0357692
NM_001228	0.0098941	0.00790782
NM_001229	0.0124642	0.014137
NM_001231	0.0363875	0.0262733
NM_001232	0.0128665	0.0102815
NM_001233	0.0592362	0.013731
NM_001234	0.0108694	0.00847055
NM_001235	0.0381122	0.038494
NM_001236	0.0664958	0.0277596
NM_001237	0.037043	0.0338887
NM_001238	0.0178067	0.0150698
NM_001239	0.024349	0.0204831
NM_001240	0.00858586	0.0137869
NM_001241	0.0207311	0.0182284
NM_001242	0.0337478	0.0610577
NM_001243	0.0172203	0.0136185
NM_001244	0.0154626	0.0154528
NM_001245	0.0159145	0.0256873
NM_001246	0.0367739	0.0876002
NM_001247	0.0183529	0.0175567
NM_001248	0.00874239	0.00790032
NM_001249	0.0191002	0.0145243
NM_001251	0.0117173	0.0143525
NM_001252	0.0282867	0.024974
NM_001253	0.0158638	0.0219125
NM_001254	0.01475	0.0138514
NM_001255	0.0352655	0.0452825
NM_001256	0.0167139	0.0257767
NM_001257	0.00903789	0.0105459
NM_001258	0.0133513	0.0120802
NM_001259	0.011016	0.0107712
NM_001260	0.0262866	0.0210839
NM_001261	0.024166	0.0209618
NM_001262	0.0523898	0.0398057
NM_001263	0.0160902	0.0131858
NM_001264	0.0101195	0.0102731
NM_001265	0.0115574	0.0130845
NM_001266	0.0137071	0.0103224
NM_001267	0.0206639	0.00869551
NM_001268	0.0519774	0.0653821
NM_001269	0.0325662	0.0266758
NM_001270	0.0144206	0.034314
NM_001271	0.0137762	0.0171833
NM_001273	0.0173296	0.0256053
NM_001274	0.0263154	0.0321942
NM_001275	0.0141363	0.0163377
NM_001276	0.0461033	0.0530492
NM_001277	0.0258883	0.0359478
NM_001278	0.020827	0.0367754
NM_001279	0.0146418	0.015766
NM_001280	0.0217715	0.0249646
NM_001281	0.0187648	0.0269644
NM_001282	0.0190174	0.0284826
NM_001284	0.0343283	0.0222183
NM_001285	0.0104817	0.0103849
NM_001286	0.0127116	0.0104983
NM_001287	0.0286098	0.0332793
NM_001288	0.0201446	0.0169078
NM_001289	0.102156	0.0882099
NM_001291	0.0242019	0.0284
NM_001292	0.0436988	0.0422183
NM_001293	0.0208417	0.0184087
NM_001294	0.0183252	0.0226911
NM_001295	0.126508	0.115497
NM_001296	0.0104545	0.00937965
NM_001297	0.00884872	0.0105604
NM_001298	0.0139567	0.0143172
NM_001299	0.0120593	0.0134726
NM_001300	0.038477	0.0383549
NM_001302	0.0124462	0.00765328
NM_001303	0.0215501	0.0213388
NM_001304	0.0348992	0.0250277
NM_001305	0.0102944	0.00848673
NM_001306	0.0128287	0.010616
NM_001307	0.0147487	0.016045
NM_001308	0.0140993	0.0112782
NM_001310	0.0236685	0.0296475
NM_001311	0.0471173	0.0424356
NM_001312	0.0101964	0.0239994
NM_001313	0.0137946	0.0146272
NM_001315	0.0112887	0.0136814
NM_001316	0.026242	0.0219377
NM_001319	0.0152991	0.0243052
NM_001320	0.0142154	0.0131981
NM_001321	0.112955	0.114226
NM_001322	0.0106881	0.0112184
NM_001323	0.0145474	0.0101427
NM_001324	0.0225849	0.0204602
NM_001325	0.0207723	0.0302593
NM_001326	0.0428786	0.0433402
NM_001327	0.00864621	0.0106435
NM_001328	0.0147742	0.0249164
NM_001330	0.0120886	0.0122484
NM_001331	0.0657785	0.0485634
NM_001332	0.0132605	0.0145481
NM_001333	0.0275467	0.0207054
NM_001334	0.045585	0.0418461
NM_001335	0.0200755	0.0281147
NM_001336	0.058522	0.0574622
NM_001337	0.0126033	0.0123812
NM_001338	0.00894711	0.0305596
NM_001340	0.0119224	0.00811939
NM_001343	0.0378168	0.0109462
NM_001344	0.0299978	0.0275852
NM_001345	0.0316664	0.032831
NM_001346	0.0278888	0.0262148
NM_001347	0.0139871	0.0109286
NM_001348	0.0222837	0.021821
NM_001349	0.03124	0.0228706
NM_001350	0.0163097	0.0208059
NM_001351	0.0373284	0.0346044
NM_001352	0.031964	0.0398381
NM_001353	0.0458793	0.012306
NM_001354	0.0381062	0.00986771
NM_001355	0.0120184	0.0198971
NM_001356	0.0228696	0.0400638
NM_001357	0.0259647	0.0450331
NM_001358	0.017122	0.0213843
NM_001359	0.0171946	0.0169655
NM_001360	0.025288	0.0280445
NM_001361	0.0325451	0.0214422
NM_001362	0.0111064	0.0101814
NM_001363	0.0202668	0.0292404
NM_001364	0.0108995	0.0100587
NM_001365	0.0119579	0.0177851
NM_001369	0.0116758	0.00938214
NM_001371	0.00942482	0.00910307
NM_001372	0.0107524	0.0111178
NM_001374	0.0119823	0.0133334
NM_001375	0.0426633	0.0358203
NM_001376	0.0254543	0.0233189
NM_001378	0.0242723	0.0209596
NM_001379	0.0234761	0.0222262
NM_001380	0.00989523	0.0116973
NM_001381	0.035774	0.0269583
NM_001382	0.0293119	0.0338993
NM_001383	0.0209642	0.0142588
NM_001384	0.0242063	0.0311384
NM_001385	0.0429028	0.025998
NM_001386	0.0522652	0.062992
NM_001387	0.0826303	0.0726177
NM_001388	0.0205007	0.0201943
NM_001389	0.00955153	0.011619
NM_001391	0.0287749	0.0134021
NM_001393	0.017836	0.0178165
NM_001395	0.0185207	0.017218
NM_001397	0.0405831	0.0429647
NM_001398	0.0244474	0.022946
NM_001399	0.014998	0.0151369
NM_001400	0.0346695	0.0430496
NM_001401	0.063081	0.0257043
NM_001402	0.00803954	0.0068837
NM_001404	0.0143495	0.01339
NM_001405	0.0122609	0.0106614
NM_001406	0.0112827	0.0105427
NM_001407	0.0829338	0.0471262
NM_001408	0.0142959	0.0152729
NM_001412	0.0409732	0.0360935
NM_001414	0.0186001	0.0171057
NM_001415	0.0277487	0.0257977
NM_001416	0.0149657	0.0121973
NM_001417	0.0176905	0.0249657
NM_001418	0.0109214	0.0172145
NM_001419	0.0323902	0.0401902
NM_001420	0.0105628	0.0115878
NM_001421	0.0227975	0.022434
NM_001423	0.0250273	0.0204035
NM_001424	0.0304963	0.0238427
NM_001425	0.0305077	0.0205865
NM_001426	0.010574	0.0114699
NM_001427	0.0119921	0.0103735
NM_001428	0.0180648	0.0120863
NM_001429	0.0262183	0.0300299
NM_001430	0.012694	0.00849978
NM_001431	0.0557317	0.0500884
NM_001432	0.0120237	0.00974678
NM_001433	0.0127724	0.00993587
NM_001436	0.0144212	0.0146623
NM_001437	0.0150101	0.0126479
NM_001438	0.014079	0.00885929
NM_001439	0.0373082	0.0466926
NM_001440	0.0201038	0.0155439
NM_001441	0.0322976	0.0135633
NM_001442	0.0171473	0.0167908
NM_001443	0.0123055	0.0112701
NM_001444	0.0234947	0.0361545
NM_001445	0.0924707	0.0701207
NM_001446	0.00973535	0.0104278
NM_001447	0.0165158	0.0106264
NM_001448	0.155938	0.140373
NM_001449	0.106212	0.111894
NM_001450	0.1053	0.0515481
NM_001451	0.0115108	0.010711
NM_001452	0.00958079	0.0107919
NM_001453	0.0191807	0.0138127
NM_001454	0.0205866	0.0120208
NM_001455	0.0349758	0.0298763
NM_001456	0.0321168	0.03345
NM_001457	0.0668217	0.0633319
NM_001458	0.0348228	0.0407228
NM_001459	0.0233985	0.0220003
NM_001460	0.0153989	0.00860844
NM_001461	0.0146416	0.0134373
NM_001462	0.00996235	0.00784272
NM_001463	0.0423172	0.0119825
NM_001465	0.0716513	0.0220874
NM_001466	0.0389127	0.0428674
NM_001467	0.0324776	0.0405939
NM_001468	0.0100708	0.0124927
NM_001469	0.0173753	0.0145931
NM_001472	0.0131113	0.00953438
NM_001474	0.0130932	0.0103834
NM_001475	0.00767891	0.00933845
NM_001476	0.0154259	0.0113622
NM_001477	0.0117756	0.00933471
NM_001478	0.0225394	0.0127199
NM_001480	0.0101777	0.0109311
NM_001481	0.0661468	0.0741503
NM_001482	0.0678814	0.0554256
NM_001483	0.0232777	0.0225471
NM_001485	0.0125057	0.00879668
NM_001486	0.00880657	0.00880593
NM_001487	0.0207298	0.0192888
NM_001488	0.0182836	0.0265072
NM_001490	0.100542	0.0686196
NM_001491	0.0114468	0.0137035
NM_001492	0.0103946	0.0124709
NM_001493	0.0209629	0.0330583
NM_001494	0.0132619	0.0143052
NM_001495	0.014598	0.0123914
NM_001496	0.011556	0.00992108
NM_001497	0.0375656	0.0499359
NM_001498	0.0316736	0.0379784
NM_001499	0.0153239	0.0148634
NM_001500	0.0344897	0.0287964
NM_001502	0.010766	0.00823077
NM_001503	0.0198227	0.0244585
NM_001504	0.108882	0.0748015
NM_001505	0.0951897	0.0781678
NM_001506	0.00969115	0.00910843
NM_001507	0.0124386	0.0111439
NM_001508	0.00792693	0.0101741
NM_001509	0.00941757	0.00716935
NM_001510	0.0122674	0.00884295
NM_001511	0.0132849	0.0134787
NM_001512	0.0737239	0.0639926
NM_001513	0.0127183	0.00973208
NM_001514	0.0186568	0.0227548
NM_001515	0.0288612	0.019749
NM_001516	0.0311838	0.0293171
NM_001517	0.0270266	0.0309472
NM_001519	0.00994688	0.0075848
NM_001520	0.0189177	0.0182001
NM_001521	0.01082	0.0181625
NM_001522	0.00906608	0.00930633
NM_001523	0.0114353	0.0100473
NM_001524	0.00909665	0.011989
NM_001525	0.00839243	0.00883733
NM_001526	0.00867255	0.0106098
NM_001527	0.0141105	0.0184992
NM_001528	0.0101159	0.00903309
NM_001530	0.0286657	0.0454249
NM_001531	0.026959	0.027829
NM_001532	0.0176973	0.0186377
NM_001533	0.0218634	0.0227177
NM_001535	0.0240296	0.0349829
NM_001537	0.0250821	0.0235987
NM_001538	0.083632	0.0608855
NM_001539	0.0220972	0.0280931
NM_001540	0.0578111	0.0480713
NM_001541	0.0112527	0.00799131
NM_001542	0.0148869	0.0105104
NM_001543	0.00889123	0.0093796
NM_001544	0.0207972	0.0223328
NM_001545	0.0223841	0.0257088
NM_001546	0.011887	0.00963265
NM_001547	0.0448372	0.0724838
NM_001548	0.0969305	0.084942
NM_001549	0.0573124	0.0829452
NM_001550	0.0311357	0.0304604
NM_001551	0.0226517	0.0187823
NM_001552	0.0916219	0.0624393
NM_001553	0.0109552	0.012769
NM_001554	0.0109441	0.0093398
NM_001555	0.0426364	0.0131908
NM_001556	0.0253591	0.0331872
NM_001557	0.0416864	0.0288219
NM_001558	0.0557242	0.0324572
NM_001559	0.0930623	0.0810019
NM_001560	0.0846543	0.0763327
NM_001561	0.0636993	0.0561246
NM_001562	0.0211316	0.0230454
NM_001563	0.0095311	0.00933618
NM_001564	0.0321952	0.0292924
NM_001565	0.153486	0.126355
NM_001566	0.0126474	0.00947975
NM_001567	0.0320872	0.0360647
NM_001568	0.0150555	0.0141226
NM_001569	0.0292282	0.0341081
NM_001570	0.0145931	0.0186322
NM_001571	0.0181812	0.0204102
NM_001584	0.0161331	0.0129232
NM_001585	0.0125323	0.0107931
NM_001587	0.0300597	0.0344063
NM_001605	0.0256441	0.0237005
NM_001606	0.00881989	0.0097355
NM_001607	0.0193661	0.0236686
NM_001608	0.0112063	0.0117218
NM_001609	0.0368366	0.0387371
NM_001610	0.0232389	0.0299641
NM_001611	0.082503	0.058011
NM_001613	0.0438415	0.0482356
NM_001614	0.00793543	0.014198
NM_001615	0.0134035	0.00983802
NM_001616	0.0355935	0.0272335
NM_001618	0.0202546	0.0211292
NM_001619	0.0123541	0.0105916
NM_001621	0.0161603	0.0126017
NM_001622	0.00941785	0.0108334
NM_001623	0.0443434	0.0486554
NM_001625	0.0431746	0.027825
NM_001626	0.0206257	0.0209557
NM_001627	0.028192	0.0348535
NM_001628	0.0203887	0.0187444
NM_001629	0.0647551	0.064326
NM_001630	0.0755408	0.0672376
NM_001631	0.014685	0.0168083
NM_001632	0.0320599	0.0323391
NM_001633	0.0109148	0.0111092
NM_001634	0.0222378	0.0245072
NM_001635	0.0139855	0.0100403
NM_001637	0.0145324	0.0118474
NM_001638	0.0166242	0.0101273
NM_001639	0.009045	0.0112223
NM_001640	0.0236954	0.0229713
NM_001641	0.0241677	0.0235923
NM_001642	0.0587372	0.0460517
NM_001643	0.0116151	0.0116952
NM_001645	0.0778513	0.0497313
NM_001646	0.0101704	0.0116459
NM_001647	0.0312162	0.0131821
NM_001648	0.011988	0.00968136
NM_001649	0.011247	0.0162162
NM_001651	0.0106604	0.00957104
NM_001652	0.0119047	0.00979117
NM_001654	0.0158457	0.0177364
NM_001655	0.0157172	0.0161586
NM_001656	0.015227	0.0254335
NM_001657	0.0675991	0.0787637
NM_001658	0.019895	0.0175106
NM_001659	0.0218013	0.0261591
NM_001660	0.0169916	0.026707
NM_001661	0.0311216	0.0320886
NM_001662	0.0187089	0.0206852
NM_001663	0.0242538	0.0312525
NM_001664	0.0141358	0.0144365
NM_001665	0.0262326	0.0232984
NM_001666	0.0267489	0.0278416
NM_001667	0.034883	0.0317477
NM_001670	0.0142002	0.0121504
NM_001671	0.0127442	0.0164492
NM_001672	0.0137819	0.00944388
NM_001673	0.034207	0.0350949
NM_001674	0.0123651	0.0159281
NM_001675	0.0318427	0.0294924
NM_001676	0.0112094	0.0130719
NM_001677	0.094321	0.106552
NM_001678	0.0369988	0.0143913
NM_001679	0.0225308	0.0184249
NM_001682	0.0195707	0.0461297
NM_001683	0.0151076	0.0123236
NM_001684	0.0108592	0.00901306
NM_001685	0.0115113	0.0104339
NM_001686	0.0136506	0.00958039
NM_001687	0.016903	0.0216712
NM_001688	0.0149751	0.0109108
NM_001689	0.0145826	0.0125788
NM_001690	0.0293439	0.0245114
NM_001692	0.0113518	0.00973911
NM_001693	0.0142472	0.025493
NM_001694	0.0146997	0.0135086
NM_001695	0.0244247	0.0292582
NM_001696	0.0170772	0.0232604
NM_001697	0.0135201	0.0100911
NM_001698	0.0345431	0.0535522
NM_001699	0.0128565	0.0107936
NM_001700	0.0109294	0.0145264
NM_001701	0.0108215	0.00853952
NM_001702	0.0115859	0.0109134
NM_001703	0.0178712	0.0170876
NM_001704	0.0148811	0.013176
NM_001707	0.0194821	0.0246878
NM_001708	0.0161641	0.0113045
NM_001709	0.00913009	0.0101556
NM_001710	0.0126773	0.00905854
NM_001711	0.00903757	0.00949559
NM_001712	0.0553466	0.0798059
NM_001713	0.0105527	0.0119754
NM_001714	0.024607	0.0319713
NM_001715	0.0638233	0.0577162
NM_001717	0.00900945	0.00735853
NM_001718	0.0531533	0.070972
NM_001719	0.0133288	0.00997937
NM_001720	0.025756	0.0230364
NM_001721	0.0123008	0.00804098
NM_001722	0.0358718	0.029454
NM_001724	0.033434	0.0390998
NM_001725	0.0123181	0.00944474
NM_001726	0.01049	0.0118954
NM_001727	0.00898881	0.00941991
NM_001728	0.0130526	0.0104102
NM_001729	0.0104452	0.0140039
NM_001730	0.0600295	0.0382541
NM_001731	0.0181531	0.0162052
NM_001732	0.0646884	0.0365548
NM_001733	0.0123926	0.0118856
NM_001734	0.0116338	0.0127674
NM_001735	0.032808	0.0314263
NM_001736	0.141716	0.110161
NM_001737	0.0115974	0.0105071
NM_001738	0.0118783	0.0130266
NM_001739	0.0116409	0.0132174
NM_001741	0.0103447	0.00927287
NM_001742	0.0139014	0.0125669
NM_001743	0.0123404	0.0116538
NM_001744	0.0380542	0.0388525
NM_001745	0.0298485	0.0244615
NM_001746	0.017966	0.0107607
NM_001747	0.0738448	0.0910298
NM_001748	0.0994629	0.084557
NM_001749	0.0186156	0.0180962
NM_001750	0.0228703	0.0404048
NM_001751	0.0257593	0.0319385
NM_001752	0.0311154	0.0281098
NM_001753	0.0257714	0.0231849
NM_001754	0.0575435	0.0581596
NM_001756	0.0760406	0.0139985
NM_001757	0.0340013	0.0339982
NM_001759	0.0186213	0.0186866
NM_001760	0.0492577	0.0535455
NM_001761	0.0488675	0.048268
NM_001762	0.0254509	0.023947
NM_001763	0.0122036	0.0143498
NM_001764	0.0123937	0.00880548
NM_001765	0.0404091	0.0725828
NM_001766	0.0141808	0.0327462
NM_001767	0.0546902	0.0226196
NM_001768	0.0144496	0.0140926
NM_001769	0.140962	0.0959519
NM_001770	0.0285456	0.0270296
NM_001771	0.0359895	0.0346045
NM_001772	0.0549075	0.073251
NM_001773	0.0106222	0.0106977
NM_001774	0.0220544	0.0267964
NM_001775	0.12308	0.077791
NM_001776	0.0320088	0.027181
NM_001777	0.0263668	0.0274543
NM_001778	0.0219831	0.0142902
NM_001779	0.0228319	0.0245405
NM_001780	0.0271012	0.0262981
NM_001781	0.0836357	0.0702686
NM_001782	0.039952	0.0453021
NM_001783	0.0370589	0.0389936
NM_001784	0.0272397	0.0259024
NM_001785	0.0686995	0.0712687
NM_001786	0.0318808	0.0313184
NM_001788	0.018392	0.0169209
NM_001789	0.0159599	0.0144707
NM_001790	0.0395923	0.0475216
NM_001791	0.0200629	0.0274052
NM_001792	0.133205	0.0698116
NM_001793	0.0108298	0.0102585
NM_001794	0.00849703	0.00831553
NM_001795	0.0108353	0.00962799
NM_001796	0.0144001	0.0147451
NM_001797	0.0225336	0.00824202
NM_001798	0.0242525	0.0371494
NM_001799	0.023282	0.0232363
NM_001800	0.01197	0.0104367
NM_001801	0.0438214	0.013001
NM_001803	0.0293086	0.031511
NM_001804	0.0122871	0.0103853
NM_001805	0.00910205	0.0124803
NM_001806	0.0194671	0.0411184
NM_001807	0.028992	0.0268015
NM_001809	0.0484102	0.059285
NM_001810	0.0314946	0.0324188
NM_001812	0.0186466	0.019728
NM_001813	0.0392292	0.049803
NM_001814	0.047533	0.0513241
NM_001815	0.0127792	0.0135957
NM_001816	0.0144364	0.0158466
NM_001817	0.00872673	0.00882165
NM_001818	0.0294274	0.00986325
NM_001819	0.0135196	0.0112496
NM_001821	0.0123752	0.0136013
NM_001822	0.0104796	0.0127557
NM_001823	0.108468	0.082043
NM_001824	0.0092975	0.0104117
NM_001825	0.0111068	0.0131269
NM_001826	0.0259052	0.0192005
NM_001827	0.0275601	0.0244491
NM_001829	0.0246393	0.0229962
NM_001830	0.019761	0.0174251
NM_001831	0.0628983	0.0466134
NM_001832	0.0103788	0.0101929
NM_001833	0.0145682	0.0173852
NM_001834	0.0290457	0.0220353
NM_001835	0.0103289	0.00990805
NM_001836	0.0434968	0.0445929
NM_001837	0.00942707	0.0108022
NM_001838	0.0510096	0.0508104
NM_001839	0.136001	0.072384
NM_001841	0.0299528	0.0185007
NM_001842	0.0124304	0.0107094
NM_001844	0.0102953	0.00815782
NM_001845	0.0347097	0.0217616
NM_001846	0.0275618	0.0218464
NM_001848	0.0227176	0.0159754
NM_001849	0.029568	0.0434379
NM_001850	0.0211497	0.0151485
NM_001852	0.0370755	0.0257993
NM_001853	0.0725463	0.103335
NM_001854	0.00814691	0.011992
NM_001855	0.0119029	0.0172323
NM_001856	0.0537108	0.0561995
NM_001858	0.029813	0.0305369
NM_001859	0.0302292	0.0309583
NM_001860	0.0207113	0.0174325
NM_001861	0.0143555	0.0123961
NM_001862	0.0171658	0.0156805
NM_001863	0.0167448	0.0125899
NM_001864	0.0118413	0.0115456
NM_001865	0.0177888	0.0131042
NM_001866	0.0158372	0.0136802
NM_001867	0.00881175	0.00730948
NM_001868	0.0101028	0.0127666
NM_001869	0.0380446	0.0167585
NM_001870	0.0114182	0.0118762
NM_001871	0.0112145	0.0119345
NM_001872	0.0138317	0.012006
NM_001873	0.0120491	0.0107818
NM_001874	0.00813794	0.00894279
NM_001875	0.0388972	0.0302569
NM_001876	0.0140314	0.0156616
NM_001877	0.0794937	0.0682687
NM_001878	0.0120382	0.0121079
NM_001879	0.0119146	0.0109692
NM_001880	0.0254881	0.0260738
NM_001881	0.0385257	0.0410457
NM_001882	0.0115759	0.0118727
NM_001883	0.011291	0.0112915
NM_001884	0.0125197	0.0105942
NM_001885	0.0297602	0.0284429
NM_001886	0.0113359	0.0116403
NM_001887	0.011612	0.010051
NM_001888	0.165819	0.115664
NM_001889	0.052183	0.0375835
NM_001890	0.0146055	0.0143098
NM_001891	0.0139658	0.0152035
NM_001892	0.0142	0.0182053
NM_001893	0.0238108	0.0268534
NM_001896	0.0200949	0.0251507
NM_001897	0.0168088	0.0181647
NM_001898	0.0127815	0.00956393
NM_001899	0.00969185	0.00762192
NM_001900	0.00933892	0.00885134
NM_001901	0.0125087	0.0104317
NM_001902	0.0564412	0.0437484
NM_001903	0.0263307	0.0290474
NM_001904	0.0255135	0.0338615
NM_001905	0.0252834	0.0358289
NM_001906	0.0120684	0.0107725
NM_001907	0.0213975	0.0264739
NM_001908	0.0441539	0.0365994
NM_001909	0.0334164	0.0261953
NM_001910	0.0106602	0.0088658
NM_001911	0.0120576	0.00985133
NM_001912	0.0108738	0.00961086
NM_001914	0.0465808	0.0395617
NM_001915	0.0311905	0.0283166
NM_001916	0.0200574	0.0171963
NM_001917	0.0074351	0.0101904
NM_001918	0.0181929	0.0273973
NM_001919	0.0276289	0.023258
NM_001920	0.00947928	0.0114647
NM_001921	0.0239199	0.0271731
NM_001922	0.0114008	0.0105
NM_001923	0.0156298	0.013775
NM_001924	0.0359447	0.0343126
NM_001925	0.0139412	0.0110137
NM_001926	0.0113637	0.00939419
NM_001927	0.00822035	0.0103766
NM_001928	0.0147981	0.0143123
NM_001929	0.0173347	0.0175249
NM_001930	0.0238579	0.0272869
NM_001931	0.0214397	0.0247686
NM_001932	0.0108185	0.00826174
NM_001933	0.020946	0.0204199
NM_001934	0.0125798	0.00930794
NM_001935	0.075486	0.0862949
NM_001937	0.01232	0.0111105
NM_001938	0.0175976	0.0267477
NM_001939	0.0169581	0.010966
NM_001940	0.0159466	0.0253291
NM_001941	0.109477	0.0731545
NM_001942	0.0122524	0.0120716
NM_001943	0.0676969	0.0405329
NM_001944	0.0105944	0.0121051
NM_001945	0.0236393	0.0295936
NM_001946	0.0193205	0.0113542
NM_001947	0.0134093	0.0209555
NM_001948	0.0430971	0.0311128
NM_001949	0.0228008	0.0287782
NM_001950	0.0180689	0.0272496
NM_001951	0.0234876	0.0329726
NM_001953	0.0428205	0.0336158
NM_001955	0.0861103	0.0738543
NM_001956	0.0184197	0.0152689
NM_001957	0.042042	0.0233223
NM_001958	0.150885	0.104431
NM_001959	0.0305275	0.0303997
NM_001960	0.0125195	0.0101295
NM_001961	0.0181099	0.016292
NM_001962	0.0143777	0.0099858
NM_001963	0.00980465	0.0110182
NM_001964	0.0884309	0.0578544
NM_001965	0.0128606	0.0109127
NM_001966	0.0500761	0.0383265
NM_001967	0.0296243	0.026525
NM_001968	0.0246393	0.0274824
NM_001969	0.0316432	0.0206258
NM_001970	0.0305249	0.0348181
NM_001971	0.012612	0.0111721
NM_001972	0.0250342	0.0193074
NM_001974	0.0815467	0.0672532
NM_001975	0.0764632	0.0673966
NM_001977	0.0234143	0.0102377
NM_001978	0.0174625	0.0110409
NM_001979	0.0686915	0.0799096
NM_001980	0.0272913	0.0490119
NM_001981	0.0242182	0.025452
NM_001982	0.0115487	0.00892954
NM_001983	0.0259922	0.0199312
NM_001984	0.0184071	0.0207181
NM_001985	0.0276301	0.0297213
NM_001986	0.0525848	0.0515536
NM_001987	0.0266538	0.0315893
NM_001988	0.00877647	0.00885012
NM_001989	0.0101013	0.0126748
NM_001990	0.0148411	0.00934212
NM_001991	0.0207374	0.0205893
NM_001992	0.0796842	0.0801014
NM_001993	0.0128011	0.0132203
NM_001994	0.0133018	0.0112134
NM_001995	0.0333954	0.0369687
NM_001997	0.00951561	0.00865258
NM_001998	0.0103625	0.0102169
NM_001999	0.0569765	0.00924972
NM_002001	0.0424791	0.0150233
NM_002002	0.0454131	0.0506935
NM_002003	0.0407286	0.0323581
NM_002004	0.0200788	0.0166614
NM_002005	0.0527683	0.0442785
NM_002006	0.0187983	0.0154602
NM_002007	0.0134435	0.0146852
NM_002009	0.00988395	0.0104569
NM_002010	0.0339082	0.016842
NM_002011	0.0119098	0.0259196
NM_002012	0.0445705	0.0370623
NM_002013	0.0160654	0.0169092
NM_002014	0.042955	0.0348307
NM_002015	0.0437222	0.0336375
NM_002017	0.0375861	0.0371194
NM_002018	0.0179708	0.019725
NM_002019	0.0318615	0.0292821
NM_002021	0.00835581	0.010607
NM_002022	0.0321128	0.0223142
NM_002023	0.0154414	0.0101344
NM_002024	0.02596	0.0197185
NM_002025	0.0148245	0.0103793
NM_002026	0.0284153	0.0126671
NM_002027	0.0149881	0.0159191
NM_002028	0.0311862	0.0240342
NM_002029	0.0132138	0.012811
NM_002030	0.0171222	0.0137604
NM_002031	0.0502452	0.0417829
NM_002032	0.0141035	0.0181335
NM_002033	0.0601287	0.0842383
NM_002034	0.0113498	0.016378
NM_002035	0.0188535	0.0240129
NM_002036	0.0469663	0.0185066
NM_002037	0.0621425	0.063783
NM_002038	0.0499451	0.0381829
NM_002039	0.0221757	0.0149998
NM_002040	0.0231383	0.0253782
NM_002042	0.00960896	0.0104534
NM_002043	0.0105414	0.0110246
NM_002044	0.0357899	0.0351365
NM_002045	0.0850663	0.0318461
NM_002046	0.016073	0.0172983
NM_002047	0.0187312	0.0226951
NM_002048	0.0110222	0.0115074
NM_002049	0.0116147	0.0134436
NM_002051	0.111819	0.0731603
NM_002052	0.0157583	0.0154238
NM_002053	0.0583772	0.0595943
NM_002054	0.0125081	0.0160757
NM_002055	0.0143709	0.013577
NM_002056	0.0385729	0.02937
NM_002060	0.0112981	0.0160497
NM_002061	0.0265627	0.0384813
NM_002062	0.011065	0.00766083
NM_002063	0.0123628	0.0109641
NM_002064	0.0287187	0.0339934
NM_002065	0.0821075	0.0498673
NM_002066	0.00980329	0.0124001
NM_002067	0.0323671	0.0364905
NM_002068	0.0775669	0.0762388
NM_002069	0.0141613	0.0105885
NM_002070	0.0181553	0.0155407
NM_002072	0.0116035	0.0108654
NM_002073	0.057169	0.0280869
NM_002074	0.0123341	0.0163875
NM_002075	0.0110428	0.0151086
NM_002076	0.0213496	0.0188025
NM_002077	0.0266035	0.0205127
NM_002078	0.0299246	0.0263558
NM_002079	0.0221753	0.0258813
NM_002080	0.023927	0.0251295
NM_002081	0.00900867	0.0105677
NM_002082	0.0131764	0.0150868
NM_002083	0.0069888	0.00848643
NM_002084	0.00888675	0.00790064
NM_002085	0.0294111	0.0274491
NM_002086	0.0218991	0.0174899
NM_002087	0.0270871	0.0286286
NM_002088	0.0113613	0.0144593
NM_002089	0.0138193	0.0139622
NM_002090	0.0101171	0.0109182
NM_002091	0.0117948	0.0126788
NM_002092	0.0310727	0.0209013
NM_002093	0.0233981	0.0239064
NM_002094	0.0159415	0.017746
NM_002095	0.0251528	0.0212715
NM_002096	0.0235626	0.02097
NM_002097	0.0214981	0.0155528
NM_002098	0.0113928	0.0144717
NM_002099	0.0128471	0.0135617
NM_002100	0.0108602	0.0104167
NM_002103	0.0293756	0.0405949
NM_002104	0.0223355	0.0203952
NM_002105	0.0366478	0.0371325
NM_002106	0.01968	0.0181073
NM_002107	0.0395918	0.0501006
NM_002108	0.0101884	0.0123994
NM_002109	0.0158569	0.0173192
NM_002110	0.131185	0.122571
NM_002111	0.0192449	0.0200796
NM_002112	0.0117597	0.0129713
NM_002113	0.00988808	0.00822731
NM_002114	0.0339663	0.0347299
NM_002116	0.12147	0.125429
NM_002117	0.0249915	0.0213154
NM_002118	0.0282221	0.0413431
NM_002119	0.0378429	0.065913
NM_002120	0.0685347	0.0608714
NM_002121	0.0226072	0.0268933
NM_002122	0.328339	0.332179
NM_002123	0.0332927	0.0426963
NM_002124	0.181016	0.242847
NM_002125	0.138653	0.270089
NM_002126	0.0189949	0.0130125
NM_002127	0.039336	0.0372043
NM_002128	0.0257412	0.0281189
NM_002129	0.0243771	0.0241826
NM_002130	0.0335426	0.0296921
NM_002133	0.0879352	0.122328
NM_002134	0.0114931	0.0106096
NM_002135	0.0113236	0.00966916
NM_002136	0.0120344	0.0104841
NM_002137	0.0179881	0.0197745
NM_002138	0.0130567	0.0165219
NM_002139	0.0148596	0.0172115
NM_002141	0.0111069	0.0083095
NM_002142	0.0139838	0.017665
NM_002143	0.00955743	0.00646059
NM_002144	0.0141698	0.0107632
NM_002145	0.100685	0.0846708
NM_002146	0.0353367	0.0386916
NM_002147	0.0121611	0.0140218
NM_002148	0.010148	0.00970797
NM_002150	0.0116072	0.00985834
NM_002151	0.0126789	0.0122857
NM_002152	0.0102253	0.0104717
NM_002153	0.012217	0.00871592
NM_002154	0.0141048	0.0209663
NM_002155	0.0570231	0.0838944
NM_002156	0.0201536	0.0184426
NM_002157	0.0160685	0.0161655
NM_002158	0.0154156	0.0163189
NM_002159	0.0103124	0.00982954
NM_002160	0.0152245	0.0219974
NM_002161	0.0177925	0.0129649
NM_002162	0.0208691	0.0204657
NM_002163	0.0461486	0.0567427
NM_002164	0.0103569	0.0228238
NM_002165	0.0158231	0.0153975
NM_002166	0.0492359	0.0650927
NM_002167	0.0668692	0.0643278
NM_002168	0.0282306	0.0319922
NM_002169	0.0147611	0.0117484
NM_002170	0.0139511	0.0134663
NM_002171	0.00941777	0.00879866
NM_002172	0.0169577	0.0133881
NM_002173	0.00939473	0.0105116
NM_002175	0.0121699	0.00904803
NM_002176	0.0124505	0.00987948
NM_002177	0.0118417	0.00872345
NM_002178	0.0313312	0.0173211
NM_002180	0.0304459	0.0304484
NM_002182	0.0117806	0.0142753
NM_002183	0.0661144	0.0780841
NM_002184	0.0513116	0.0694842
NM_002185	0.0261854	0.0157356
NM_002187	0.0482044	0.0293642
NM_002188	0.0409616	0.0180143
NM_002190	0.0106614	0.0105062
NM_002191	0.0115961	0.00794875
NM_002192	0.0213401	0.0260925
NM_002193	0.00935289	0.00960289
NM_002194	0.0241831	0.0255217
NM_002195	0.00829737	0.00790165
NM_002196	0.0162289	0.0118344
NM_002197	0.0335428	0.0421186
NM_002198	0.0399314	0.0320723
NM_002199	0.0306781	0.0513233
NM_002200	0.0176278	0.0160269
NM_002201	0.0435441	0.0426037
NM_002202	0.0120731	0.0101188
NM_002203	0.0148043	0.00931641
NM_002204	0.010055	0.0067173
NM_002205	0.0269667	0.0219155
NM_002206	0.0114297	0.0106319
NM_002207	0.0105653	0.0109271
NM_002208	0.0382739	0.0373078
NM_002209	0.0583344	0.0404156
NM_002210	0.010486	0.0105868
NM_002211	0.037263	0.0232113
NM_002213	0.101458	0.0937324
NM_002214	0.0219333	0.0290402
NM_002215	0.0332082	0.0589595
NM_002216	0.0103674	0.00913204
NM_002217	0.0146801	0.0153476
NM_002218	0.0321038	0.0246266
NM_002220	0.044954	0.031737
NM_002221	0.0685626	0.0353037
NM_002222	0.0337029	0.0402305
NM_002223	0.045275	0.0484163
NM_002224	0.0399941	0.0295637
NM_002225	0.035102	0.0308837
NM_002226	0.0145182	0.0121113
NM_002227	0.0516104	0.0466675
NM_002228	0.0479105	0.044341
NM_002229	0.0117744	0.017376
NM_002230	0.0327377	0.0204929
NM_002231	0.0398501	0.0504578
NM_002232	0.0210564	0.0340827
NM_002233	0.0100705	0.00997512
NM_002234	0.0146413	0.0147897
NM_002235	0.00986401	0.0112275
NM_002236	0.0128637	0.00957502
NM_002238	0.011522	0.00977373
NM_002239	0.0113811	0.00968255
NM_002240	0.00797756	0.0123731
NM_002241	0.0124295	0.00971015
NM_002242	0.00970625	0.0118387
NM_002245	0.101659	0.0880059
NM_002246	0.0127965	0.0111493
NM_002247	0.12535	0.119104
NM_002248	0.0501252	0.0477012
NM_002249	0.0124583	0.0148398
NM_002250	0.0395357	0.0316811
NM_002251	0.0134531	0.0105382
NM_002252	0.0113952	0.00983057
NM_002253	0.00908836	0.00744845
NM_002254	0.0120483	0.013384
NM_002255	0.0082542	0.0109825
NM_002256	0.0120771	0.0114207
NM_002257	0.0503197	0.0488488
NM_002258	0.0105975	0.010195
NM_002259	0.00937269	0.0142098
NM_002260	0.0109571	0.0110757
NM_002261	0.0105541	0.00805675
NM_002262	0.0188251	0.0160026
NM_002264	0.0192137	0.0276765
NM_002265	0.0135475	0.0172573
NM_002266	0.0193071	0.0370435
NM_002267	0.0169505	0.0275791
NM_002268	0.0267507	0.0302024
NM_002269	0.0258955	0.0371001
NM_002270	0.0103035	0.00878084
NM_002271	0.0378624	0.0254048
NM_002272	0.0114163	0.0118117
NM_002273	0.0119744	0.01337
NM_002274	0.0136227	0.0102087
NM_002275	0.0111035	0.0123067
NM_002276	0.0100019	0.00872813
NM_002277	0.0092498	0.00983877
NM_002278	0.0126023	0.00933433
NM_002279	0.0122144	0.0118666
NM_002280	0.013563	0.0139517
NM_002281	0.0110429	0.00905179
NM_002283	0.00782925	0.00828302
NM_002284	0.0499901	0.0317365
NM_002285	0.0099611	0.0113324
NM_002286	0.0826516	0.104263
NM_002289	0.0119811	0.00877077
NM_002290	0.0130994	0.0124433
NM_002291	0.0631354	0.0494609
NM_002292	0.0100305	0.00882525
NM_002293	0.0549496	0.0408
NM_002295	0.010446	0.00886627
NM_002296	0.0207406	0.021282
NM_002297	0.00944154	0.0115274
NM_002298	0.0145273	0.0174163
NM_002299	0.030758	0.0372455
NM_002300	0.0110226	0.010914
NM_002301	0.0240867	0.0164186
NM_002302	0.013377	0.0115357
NM_002303	0.0213108	0.0330092
NM_002305	0.0338413	0.0361249
NM_002306	0.051069	0.0669134
NM_002307	0.0086974	0.00837274
NM_002308	0.0298141	0.0275389
NM_002309	0.0188594	0.0266718
NM_002310	0.00735947	0.00868779
NM_002312	0.0294559	0.037373
[truncated: 16,082 more rows]
