# Supplementary material for: Gene Expression Variability within and between Human Populations and Implications toward Disease Susceptibility
Source: PLoS Comput Biol. 2010 Aug 26;6(8):e1000910. doi: 10.1371/journal.pcbi.1000910 (PMC2928754; doi:10.1371/journal.pcbi.1000910)
Supplement: Table S2 — The list of outlier genes with population-specific variability. (0.13 MB XLS) [file pcbi.1000910.s007.xls]

## Sheet: outliers
Outliers (intersection between YRI and CEU)				Outliers (Unions of YRI and CEU)
NM_000035				NM_000035
NM_000044				NM_000044
NM_000049				NM_000049
NM_000050				NM_000050
NM_000055				NM_000055
NM_000072				NM_000067
NM_000110				NM_000072
NM_000129				NM_000099
NM_000130				NM_000110
NM_000163				NM_000129
NM_000184				NM_000130
NM_000212				NM_000138
NM_000222				NM_000156
NM_000295				NM_000163
NM_000301				NM_000184
NM_000303				NM_000185
NM_000328				NM_000212
NM_000340				NM_000214
NM_000382				NM_000216
NM_000397				NM_000222
NM_000442				NM_000253
NM_000452				NM_000295
NM_000478				NM_000301
NM_000495				NM_000303
NM_000517				NM_000328
NM_000519				NM_000340
NM_000558				NM_000382
NM_000559				NM_000397
NM_000575				NM_000442
NM_000597				NM_000452
NM_000598				NM_000478
NM_000619				NM_000484
NM_000627				NM_000495
NM_000647				NM_000505
NM_000691				NM_000517
NM_000693				NM_000519
NM_000700				NM_000558
NM_000732				NM_000559
NM_000840				NM_000561
NM_000856				NM_000575
NM_000857				NM_000597
NM_000860				NM_000598
NM_000867				NM_000619
NM_000869				NM_000627
NM_000887				NM_000632
NM_000891				NM_000647
NM_000905				NM_000691
NM_000906				NM_000693
NM_000913				NM_000700
NM_000935				NM_000716
NM_000939				NM_000724
NM_000948				NM_000732
NM_000951				NM_000840
NM_000952				NM_000856
NM_000956				NM_000857
NM_001054				NM_000860
NM_001065				NM_000867
NM_001077				NM_000869
NM_001091				NM_000880
NM_001099				NM_000887
NM_001105				NM_000891
NM_001182				NM_000904
NM_001200				NM_000905
NM_001233				NM_000906
NM_001236				NM_000913
NM_001242				NM_000935
NM_001246				NM_000939
NM_001270				NM_000940
NM_001338				NM_000948
NM_001343				NM_000951
NM_001353				NM_000952
NM_001354				NM_000956
NM_001357				NM_000991
NM_001401				NM_001034
NM_001407				NM_001045
NM_001450				NM_001046
NM_001463				NM_001054
NM_001465				NM_001065
NM_001490				NM_001069
NM_001504				NM_001073
NM_001547				NM_001074
NM_001549				NM_001077
NM_001552				NM_001091
NM_001555				NM_001099
NM_001645				NM_001105
NM_001678				NM_001120
NM_001682				NM_001124
NM_001698				NM_001141
NM_001712				NM_001182
NM_001732				NM_001200
NM_001756				NM_001206
NM_001765				NM_001233
NM_001767				NM_001236
NM_001769				NM_001242
NM_001775				NM_001246
NM_001792				NM_001268
NM_001801				NM_001270
NM_001806				NM_001338
NM_001839				NM_001343
NM_001853				NM_001353
NM_001888				NM_001354
NM_001941				NM_001356
NM_001943				NM_001357
NM_001958				NM_001401
NM_001964				NM_001407
NM_001980				NM_001445
NM_001999				NM_001450
NM_002001				NM_001463
NM_002033				NM_001465
NM_002036				NM_001490
NM_002045				NM_001504
NM_002051				NM_001530
NM_002065				NM_001538
NM_002073				NM_001547
NM_002119				NM_001549
NM_002124				NM_001552
NM_002125				NM_001555
NM_002133				NM_001558
NM_002155				NM_001565
NM_002188				NM_001611
NM_002199				NM_001645
NM_002215				NM_001657
NM_002221				NM_001677
NM_002286				NM_001678
NM_002342				NM_001682
NM_002351				NM_001698
NM_002354				NM_001712
NM_002391				NM_001718
NM_002395				NM_001730
NM_002412				NM_001732
NM_002423				NM_001736
NM_002428				NM_001747
NM_002432				NM_001750
NM_002463				NM_001756
NM_002487				NM_001765
NM_002543				NM_001766
NM_002546				NM_001767
NM_002575				NM_001769
NM_002621				NM_001772
NM_002640				NM_001775
NM_002658				NM_001792
NM_002659				NM_001801
NM_002744				NM_001806
NM_002841				NM_001823
NM_002866				NM_001839
NM_002899				NM_001853
NM_002961				NM_001869
NM_002964				NM_001888
NM_002981				NM_001935
NM_002987				NM_001941
NM_003012				NM_001943
NM_003061				NM_001958
NM_003097				NM_001964
NM_003105				NM_001979
NM_003116				NM_001980
NM_003121				NM_001999
NM_003123				NM_002001
NM_003124				NM_002033
NM_003181				NM_002036
NM_003213				NM_002045
NM_003221				NM_002051
NM_003243				NM_002065
NM_003287				NM_002073
NM_003289				NM_002119
NM_003326				NM_002122
NM_003333				NM_002124
NM_003383				NM_002125
NM_003420				NM_002133
NM_003480				NM_002155
NM_003486				NM_002166
NM_003489				NM_002183
NM_003507				NM_002184
NM_003543				NM_002188
NM_003559				NM_002199
NM_003702				NM_002215
NM_003758				NM_002221
NM_003759				NM_002266
NM_003787				NM_002286
NM_003866				NM_002306
NM_003877				NM_002342
NM_003887				NM_002351
NM_003914				NM_002354
NM_003931				NM_002391
NM_003975				NM_002395
NM_003979				NM_002412
NM_003986				NM_002416
NM_004001				NM_002423
NM_004094				NM_002428
NM_004106				NM_002432
NM_004245				NM_002463
NM_004281				NM_002468
NM_004293				NM_002487
NM_004296				NM_002522
NM_004329				NM_002526
NM_004350				NM_002543
NM_004360				NM_002546
NM_004362				NM_002569
NM_004389				NM_002575
NM_004403				NM_002579
NM_004405				NM_002621
NM_004426				NM_002640
NM_004442				NM_002644
NM_004497				NM_002651
NM_004513				NM_002658
NM_004533				NM_002659
NM_004591				NM_002688
NM_004594				NM_002744
NM_004615				NM_002754
NM_004622				NM_002813
NM_004685				NM_002841
NM_004728				NM_002866
NM_004741				NM_002899
NM_004758				NM_002908
NM_004808				NM_002961
NM_004833				NM_002964
NM_004854				NM_002971
NM_004861				NM_002981
NM_004887				NM_002987
NM_004900				NM_002990
NM_004902				NM_003012
NM_004917				NM_003016
NM_004942				NM_003017
NM_004951				NM_003051
NM_004968				NM_003061
NM_005010				NM_003097
NM_005012				NM_003105
NM_005024				NM_003116
NM_005032				NM_003121
NM_005066				NM_003123
NM_005077				NM_003124
NM_005127				NM_003131
NM_005139				NM_003181
NM_005168				NM_003213
NM_005211				NM_003221
NM_005213				NM_003243
NM_005245				NM_003287
NM_005248				NM_003289
NM_005249				NM_003302
NM_005252				NM_003326
NM_005253				NM_003333
NM_005277				NM_003380
NM_005303				NM_003383
NM_005306				NM_003420
NM_005330				NM_003480
NM_005345				NM_003486
NM_005346				NM_003489
NM_005356				NM_003506
NM_005410				NM_003507
NM_005423				NM_003508
NM_005442				NM_003516
NM_005460				NM_003517
NM_005461				NM_003521
NM_005467				NM_003523
NM_005470				NM_003524
NM_005475				NM_003535
NM_005502				NM_003543
NM_005512				NM_003544
NM_005532				NM_003559
NM_005556				NM_003567
NM_005562				NM_003571
NM_005567				NM_003672
NM_005595				NM_003702
NM_005596				NM_003758
NM_005602				NM_003759
NM_005630				NM_003787
NM_005651				NM_003853
NM_005682				NM_003855
NM_005686				NM_003866
NM_005727				NM_003877
NM_005767				NM_003887
NM_005769				NM_003914
NM_005771				NM_003931
NM_005795				NM_003966
NM_005808				NM_003970
NM_005909				NM_003975
NM_005911				NM_003979
NM_005952				NM_003986
NM_006067				NM_004000
NM_006080				NM_004001
NM_006099				NM_004004
NM_006117				NM_004094
NM_006182				NM_004102
NM_006183				NM_004106
NM_006203				NM_004107
NM_006216				NM_004126
NM_006226				NM_004181
NM_006274				NM_004199
NM_006275				NM_004221
NM_006324				NM_004226
NM_006346				NM_004245
NM_006372				NM_004281
NM_006386				NM_004293
NM_006419				NM_004296
NM_006497				NM_004316
NM_006498				NM_004329
NM_006518				NM_004345
NM_006528				NM_004350
NM_006547				NM_004360
NM_006548				NM_004362
NM_006558				NM_004389
NM_006618				NM_004396
NM_006623				NM_004403
NM_006633				NM_004405
NM_006779				NM_004414
NM_006864				NM_004426
NM_006866				NM_004442
NM_006895				NM_004479
NM_006946				NM_004497
NM_006987				NM_004513
NM_006997				NM_004533
NM_007015				NM_004560
NM_007046				NM_004573
NM_007072				NM_004591
NM_007105				NM_004594
NM_007127				NM_004615
NM_007199				NM_004622
NM_009588				NM_004626
NM_012092				NM_004664
NM_012098				NM_004685
NM_012120				NM_004728
NM_012137				NM_004741
NM_012213				NM_004747
NM_012252				NM_004753
NM_012281				NM_004758
NM_012307				NM_004808
NM_012337				NM_004820
NM_012387				NM_004833
NM_012449				NM_004842
NM_013233				NM_004854
NM_013261				NM_004861
NM_013269				NM_004864
NM_013281				NM_004887
NM_013319				NM_004900
NM_013327				NM_004902
NM_013378				NM_004917
NM_013410				NM_004938
NM_013439				NM_004942
NM_013999				NM_004951
NM_014016				NM_004968
NM_014059				NM_005010
NM_014068				NM_005012
NM_014144				NM_005024
NM_014151				NM_005032
NM_014178				NM_005066
NM_014181				NM_005077
NM_014247				NM_005107
NM_014320				NM_005127
NM_014326				NM_005139
NM_014379				NM_005168
NM_014380				NM_005194
NM_014392				NM_005201
NM_014422				NM_005211
NM_014475				NM_005213
NM_014476				NM_005245
NM_014480				NM_005248
NM_014483				NM_005249
NM_014568				NM_005252
NM_014575				NM_005253
NM_014677				NM_005277
NM_014735				NM_005303
NM_014767				NM_005306
NM_014786				NM_005308
NM_014792				NM_005330
NM_014795				NM_005345
NM_014811				NM_005346
NM_014882				NM_005356
NM_014899				NM_005358
NM_014913				NM_005384
NM_014914				NM_005410
NM_014934				NM_005423
NM_014978				NM_005435
NM_015014				NM_005442
NM_015059				NM_005460
NM_015062				NM_005461
NM_015101				NM_005467
NM_015163				NM_005470
NM_015169				NM_005475
NM_015187				NM_005502
NM_015252				NM_005512
NM_015310				NM_005532
NM_015345				NM_005547
NM_015381				NM_005556
NM_015425				NM_005562
NM_015460				NM_005567
NM_015577				NM_005595
NM_015668				NM_005596
NM_015687				NM_005602
NM_015714				NM_005627
NM_015719				NM_005630
NM_015834				NM_005651
NM_015976				NM_005658
NM_016002				NM_005682
NM_016052				NM_005683
NM_016073				NM_005686
NM_016081				NM_005715
NM_016095				NM_005727
NM_016101				NM_005763
NM_016109				NM_005767
NM_016274				NM_005769
NM_016382				NM_005771
NM_016524				NM_005795
NM_016533				NM_005808
NM_016564				NM_005857
NM_016588				NM_005909
NM_016608				NM_005911
NM_017449				NM_005919
NM_017549				NM_005944
NM_017574				NM_005952
NM_017577				NM_006060
NM_017633				NM_006067
NM_017641				NM_006080
NM_017671				NM_006095
NM_017679				NM_006099
NM_017681				NM_006117
NM_017687				NM_006149
NM_017709				NM_006176
NM_017720				NM_006182
NM_017823				NM_006183
NM_017878				NM_006202
NM_017899				NM_006203
NM_017911				NM_006214
NM_017935				NM_006216
NM_017954				NM_006224
NM_018022				NM_006226
NM_018137				NM_006274
NM_018166				NM_006275
NM_018192				NM_006314
NM_018221				NM_006317
NM_018242				NM_006324
NM_018245				NM_006346
NM_018268				NM_006372
NM_018284				NM_006386
NM_018357				NM_006419
NM_018407				NM_006426
NM_018419				NM_006447
NM_018422				NM_006497
NM_018434				NM_006498
NM_018487				NM_006518
NM_018556				NM_006528
NM_018559				NM_006547
NM_018649				NM_006548
NM_018650				NM_006558
NM_018654				NM_006618
NM_018664				NM_006623
NM_018665				NM_006633
NM_018697				NM_006642
NM_018725				NM_006670
NM_018837				NM_006700
NM_018947				NM_006760
NM_018993				NM_006779
NM_019000				NM_006807
NM_019079				NM_006832
NM_019554				NM_006834
NM_019903				NM_006864
NM_020056				NM_006866
NM_020116				NM_006877
NM_020143				NM_006895
NM_020152				NM_006946
NM_020297				NM_006987
NM_020300				NM_006996
NM_020382				NM_006997
NM_020440				NM_007015
NM_020554				NM_007046
NM_020661				NM_007047
NM_020674				NM_007071
NM_020685				NM_007072
NM_020849				NM_007105
NM_020871				NM_007127
NM_020973				NM_007144
NM_021004				NM_007150
NM_021005				NM_007199
NM_021101				NM_007237
NM_021116				NM_009588
NM_021224				NM_012072
NM_021244				NM_012092
NM_021795				NM_012098
NM_021800				NM_012099
NM_021945				NM_012120
NM_021963				NM_012137
NM_021992				NM_012213
NM_021995				NM_012252
NM_022068				NM_012261
NM_022089				NM_012281
NM_022121				NM_012307
NM_022158				NM_012337
NM_022337				NM_012342
NM_022343				NM_012387
NM_022443				NM_012413
NM_022468				NM_012443
NM_022555				NM_012449
NM_022652				NM_013233
NM_022716				NM_013238
NM_022751				NM_013261
NM_022763				NM_013269
NM_022804				NM_013281
NM_022877				NM_013319
NM_023939				NM_013327
NM_024070				NM_013332
NM_024087				NM_013378
NM_024119				NM_013410
NM_024421				NM_013439
NM_024422				NM_013999
NM_024430				NM_014016
NM_024508				NM_014033
NM_024567				NM_014059
NM_024572				NM_014068
NM_024603				NM_014144
NM_024616				NM_014151
NM_024652				NM_014178
NM_024657				NM_014181
NM_024686				NM_014214
NM_024725				NM_014216
NM_024743				NM_014226
NM_024788				NM_014247
NM_024829				NM_014320
NM_024969				NM_014326
NM_025106				NM_014333
NM_025118				NM_014354
NM_025184				NM_014379
NM_030627				NM_014380
NM_030666				NM_014383
NM_030754				NM_014392
NM_030769				NM_014422
NM_030797				NM_014452
NM_030922				NM_014475
NM_030923				NM_014476
NM_031285				NM_014480
NM_031418				NM_014483
NM_031476				NM_014556
NM_031480				NM_014567
NM_031484				NM_014568
NM_031934				NM_014575
NM_032024				NM_014583
NM_032109				NM_014600
NM_032119				NM_014643
NM_032213				NM_014654
NM_032261				NM_014677
NM_032263				NM_014733
NM_032287				NM_014735
NM_032318				NM_014767
NM_032404				NM_014782
NM_032452				NM_014786
NM_032508				NM_014792
NM_032525				NM_014795
NM_032558				NM_014811
NM_032592				NM_014882
NM_032608				NM_014899
NM_032622				NM_014908
NM_032709				NM_014913
NM_032727				NM_014914
NM_032744				NM_014916
NM_032747				NM_014934
NM_032756				NM_014978
NM_032772				NM_015014
NM_032782				NM_015059
NM_032812				NM_015062
NM_032860				NM_015101
NM_032866				NM_015163
NM_032895				NM_015169
NM_032935				NM_015179
NM_032947				NM_015187
NM_032992				NM_015252
NM_033049				NM_015286
NM_033069				NM_015310
NM_033102				NM_015345
NM_033109				NM_015381
NM_033120				NM_015391
NM_033140				NM_015392
NM_033238				NM_015425
NM_033331				NM_015440
NM_033423				NM_015460
NM_033445				NM_015469
NM_033452				NM_015567
NM_052814				NM_015569
NM_052820				NM_015577
NM_052860				NM_015668
NM_052947				NM_015687
NM_052972				NM_015714
NM_058237				NM_015719
NM_080605				NM_015834
NM_080682				NM_015894
NM_080684				NM_015927
NM_080792				NM_015976
NM_080863				NM_016002
NM_130446				NM_016052
NM_130783				NM_016073
NM_133642				NM_016081
NM_134444				NM_016095
NM_138290				NM_016101
NM_138399				NM_016109
NM_138573				NM_016150
NM_138768				NM_016229
NM_139024				NM_016274
NM_139176				NM_016352
NM_139244				NM_016362
NM_139316				NM_016382
NM_144662				NM_016428
NM_144669				NM_016467
NM_144957				NM_016524
NM_145008				NM_016533
NM_145016				NM_016564
NM_145035				NM_016582
NM_145045				NM_016588
NM_145051				NM_016608
NM_145057				NM_016618
NM_145117				NM_016651
NM_145165				NM_016824
NM_145235				NM_017412
NM_145263				NM_017414
NM_145658				NM_017429
NM_145753				NM_017448
NM_145792				NM_017449
NM_147149				NM_017549
NM_147190				NM_017574
NM_148888				NM_017577
NM_148901				NM_017585
NM_148918				NM_017633
NM_148970				NM_017641
NM_152296				NM_017671
NM_152302				NM_017679
NM_152311				NM_017681
NM_152330				NM_017687
NM_152333				NM_017709
NM_152378				NM_017720
NM_152423				NM_017763
NM_152431				NM_017782
NM_152464				NM_017805
NM_152496				NM_017823
NM_152501				NM_017824
NM_152636				NM_017866
NM_152687				NM_017878
NM_152709				NM_017898
NM_153022				NM_017899
NM_153028				NM_017911
NM_153206				NM_017935
NM_153322				NM_017947
NM_153355				NM_017954
NM_153374				NM_018015
NM_153427				NM_018022
NM_153615				NM_018023
NM_153746				NM_018051
NM_153837				NM_018061
NM_173344				NM_018137
NM_173508				NM_018166
NM_173516				NM_018192
NM_173524				NM_018199
NM_173604				NM_018215
NM_173633				NM_018221
NM_173668				NM_018242
NM_173703				NM_018245
NM_173714				NM_018268
NM_173796				NM_018275
NM_174896				NM_018281
NM_174941				NM_018282
NM_175061				NM_018284
NM_175920				NM_018326
NM_176867				NM_018330
NM_177557				NM_018355
NM_178012				NM_018357
NM_178157				NM_018404
NM_178507				NM_018407
NM_178579				NM_018419
NM_178820				NM_018422
NM_178831				NM_018434
NM_178868				NM_018466
NM_181054				NM_018487
NM_181361				NM_018490
NM_181618				NM_018556
NM_181724				NM_018559
NM_182485				NM_018584
NM_182549				NM_018640
NM_182564				NM_018643
NM_182703				NM_018649
NM_182762				NM_018650
NM_182812				NM_018654
NM_182943				NM_018659
NM_183065				NM_018664
NM_183376				NM_018665
NM_183393				NM_018697
NM_194311				NM_018725
NM_194318				NM_018837
NM_194448				NM_018947
NM_194449				NM_018986
NM_197955				NM_018993
NM_198083				NM_019000
NM_198087				NM_019013
NM_198148				NM_019079
NM_198157				NM_019554
NM_198174				NM_019609
NM_198212				NM_019610
NM_198254				NM_019886
NM_198277				NM_019903
NM_198278				NM_020056
NM_198280				NM_020116
NM_198281				NM_020143
NM_198526				NM_020152
NM_198530				NM_020182
NM_198596				NM_020297
NM_198795				NM_020300
NM_198828				NM_020311
NM_198859				NM_020347
NM_199327				NM_020382
NM_199423				NM_020440
NM_201262				NM_020451
NM_201264				NM_020554
NM_201591				NM_020648
NM_201636				NM_020661
NM_201997				NM_020674
NM_202758				NM_020677
NM_203449				NM_020685
NM_206837				NM_020750
				NM_020849
				NM_020871
				NM_020973
				NM_020979
				NM_020980
				NM_021004
				NM_021005
				NM_021021
				NM_021101
				NM_021116
				NM_021154
				NM_021170
				NM_021203
				NM_021219
				NM_021224
				NM_021244
				NM_021779
				NM_021795
				NM_021800
				NM_021945
				NM_021963
				NM_021966
				NM_021991
				NM_021992
				NM_021995
				NM_021999
				NM_022036
				NM_022068
				NM_022089
				NM_022121
				NM_022141
				NM_022157
				NM_022158
				NM_022161
				NM_022337
				NM_022343
				NM_022371
				NM_022440
				NM_022443
				NM_022450
				NM_022468
				NM_022471
				NM_022489
				NM_022555
				NM_022652
				NM_022716
				NM_022720
				NM_022748
				NM_022751
				NM_022763
				NM_022804
				NM_022877
				NM_023037
				NM_023927
				NM_023930
				NM_023939
				NM_024017
				NM_024043
				NM_024070
				NM_024087
				NM_024090
				NM_024119
				NM_024297
				NM_024301
				NM_024421
				NM_024422
				NM_024430
				NM_024508
				NM_024509
				NM_024522
				NM_024567
				NM_024572
				NM_024579
				NM_024603
				NM_024616
				NM_024652
				NM_024657
				NM_024660
				NM_024686
				NM_024709
				NM_024725
				NM_024742
				NM_024743
				NM_024788
				NM_024807
				NM_024829
				NM_024921
				NM_024969
				NM_025047
				NM_025106
				NM_025113
				NM_025118
				NM_025184
				NM_030627
				NM_030666
				NM_030668
				NM_030754
				NM_030769
				NM_030785
				NM_030797
				NM_030810
				NM_030922
				NM_030923
				NM_030984
				NM_031285
				NM_031418
				NM_031472
				NM_031476
				NM_031479
				NM_031480
				NM_031484
				NM_031485
				NM_031934
				NM_031946
				NM_031950
				NM_032024
				NM_032041
				NM_032109
				NM_032119
				NM_032145
				NM_032195
				NM_032211
				NM_032213
				NM_032261
				NM_032263
				NM_032270
				NM_032287
				NM_032318
				NM_032390
				NM_032404
				NM_032452
				NM_032505
				NM_032508
				NM_032525
				NM_032558
				NM_032570
				NM_032592
				NM_032608
				NM_032622
				NM_032682
				NM_032709
				NM_032723
				NM_032727
				NM_032738
				NM_032744
				NM_032747
				NM_032756
				NM_032772
				NM_032782
				NM_032812
				NM_032844
				NM_032860
				NM_032862
				NM_032866
				NM_032895
				NM_032935
				NM_032947
				NM_032992
				NM_033023
				NM_033046
				NM_033049
				NM_033069
				NM_033102
				NM_033103
				NM_033109
				NM_033120
				NM_033140
				NM_033211
				NM_033238
				NM_033331
				NM_033423
				NM_033445
				NM_033452
				NM_052814
				NM_052820
				NM_052860
				NM_052942
				NM_052947
				NM_052963
				NM_052972
				NM_057158
				NM_058184
				NM_058195
				NM_058229
				NM_058237
				NM_080432
				NM_080605
				NM_080682
				NM_080684
				NM_080792
				NM_080816
				NM_080863
				NM_080915
				NM_130441
				NM_130446
				NM_130783
				NM_130906
				NM_133642
				NM_134444
				NM_138285
				NM_138286
				NM_138290
				NM_138397
				NM_138399
				NM_138425
				NM_138439
				NM_138453
				NM_138573
				NM_138768
				NM_138771
				NM_138787
				NM_139024
				NM_139176
				NM_139244
				NM_139316
				NM_144594
				NM_144662
				NM_144669
				NM_144683
				NM_144766
				NM_144957
				NM_145008
				NM_145016
				NM_145035
				NM_145040
				NM_145045
				NM_145051
				NM_145057
				NM_145117
				NM_145165
				NM_145235
				NM_145263
				NM_145297
				NM_145303
				NM_145319
				NM_145658
				NM_145753
				NM_145792
				NM_145867
				NM_146421
				NM_147149
				NM_147190
				NM_148888
				NM_148901
				NM_148918
				NM_148957
				NM_148970
				NM_152262
				NM_152296
				NM_152302
				NM_152311
				NM_152319
				NM_152330
				NM_152333
				NM_152378
				NM_152423
				NM_152431
				NM_152449
				NM_152464
				NM_152496
				NM_152501
				NM_152512
				NM_152553
				NM_152582
				NM_152594
				NM_152636
				NM_152687
				NM_152709
				NM_152775
				NM_152992
				NM_153022
				NM_153028
				NM_153035
				NM_153048
				NM_153206
				NM_153211
				NM_153246
				NM_153322
				NM_153355
				NM_153374
				NM_153427
				NM_153615
				NM_153746
				NM_153837
				NM_170710
				NM_172004
				NM_172014
				NM_172110
				NM_172315
				NM_173344
				NM_173468
				NM_173498
				NM_173508
				NM_173516
				NM_173524
				NM_173549
				NM_173584
				NM_173604
				NM_173609
				NM_173633
				NM_173642
				NM_173654
				NM_173668
				NM_173703
				NM_173714
				NM_173796
				NM_174896
				NM_174934
				NM_174941
				NM_175061
				NM_175610
				NM_175918
				NM_175920
				NM_176867
				NM_176869
				NM_176878
				NM_177427
				NM_177526
				NM_177557
				NM_178012
				NM_178157
				NM_178177
				NM_178450
				NM_178496
				NM_178507
				NM_178579
				NM_178584
				NM_178587
				NM_178820
				NM_178831
				NM_178858
				NM_178868
				NM_181054
				NM_181341
				NM_181361
				NM_181472
				NM_181618
				NM_181689
				NM_181724
				NM_181756
				NM_182485
				NM_182512
				NM_182549
				NM_182564
				NM_182576
				NM_182610
				NM_182685
				NM_182703
				NM_182743
				NM_182762
				NM_182812
				NM_182943
				NM_183065
				NM_183376
				NM_183393
				NM_194272
				NM_194291
				NM_194311
				NM_194312
				NM_194318
				NM_194448
				NM_194449
				NM_197955
				NM_198083
				NM_198087
				NM_198148
				NM_198152
				NM_198157
				NM_198174
				NM_198212
				NM_198254
				NM_198277
				NM_198278
				NM_198280
				NM_198281
				NM_198526
				NM_198530
				NM_198596
				NM_198795
				NM_198828
				NM_198859
				NM_199134
				NM_199168
				NM_199290
				NM_199327
				NM_199423
				NM_201262
				NM_201264
				NM_201563
				NM_201591
				NM_201636
				NM_201997
				NM_202758
				NM_203449
				NM_206837

## Sheet: Enrichment of outliers in CEU
Category	Term	Count	%	PValue	Genes	List Total	Pop Hits	Pop Total	Fold Enrichment	Bonferroni	Benjamini	FDR
GENETIC_ASSOCIATION_DB_DISEASE	sarcoidosis tuberculosis	5	0.0131	0.000894811	NM_000397, NM_022555, NM_000295, NM_182549, NM_020056,	114	12	2860	10.4532	0.997367	0.997367	1.73907
GENETIC_ASSOCIATION_DB_DISEASE	osteoarthritis	9	0.0235	0.00119306	NM_000072, NM_022555, NM_000575, NM_001463, NM_182549, NM_000044, NM_020056, NM_001200, NM_002546,	114	55	2860	4.10526	0.999637	0.980943	2.31231
GENETIC_ASSOCIATION_DB_DISEASE	allergy	4	0.0104	0.00290911	NM_022555, NM_182549, NM_002188, NM_020056,	114	8	2860	12.5439	1	0.998409	5.54944
GENETIC_ASSOCIATION_DB_DISEASE	chronic fatigue syndrome	5	0.0131	0.00290996	NM_022555, NM_000939, NM_182549, NM_020056, NM_001756,	114	16	2860	7.83991	1	0.992045	5.55102
GENETIC_ASSOCIATION_DB_DISEASE	Graves disease	5	0.0131	0.00460229	NM_022555, NM_000575, NM_182549, NM_002188, NM_020056,	114	18	2860	6.96881	1	0.997804	8.64349
GENETIC_ASSOCIATION_DB_DISEASE	arthritis, juvenile	5	0.0131	0.00460229	NM_000948, NM_022555, NM_182549, NM_020056, NM_001756,	114	18	2860	6.96881	1	0.997804	8.64349
GOTERM_BP_ALL	GO:0009611~response to wounding	31	0.0809	2.89961e-07	NM_016533, NM_004887, NM_000952, NM_000295, NM_001105, NM_004591, NM_002188, NM_000130, NM_002659, NM_006528, NM_005769, NM_002543, NM_000301, NM_000647, NM_002001, NM_002987, NM_002981, NM_000072, NM_000397, NM_000575, NM_001769, NM_001200, NM_000442, NM_198174, NM_002045, NM_001801, NM_002964, NM_002658, NM_006274, NM_001552, NM_006419,	306	412	11809	2.90373	0.00150637	0.00150637	0.000554078
GOTERM_BP_ALL	GO:0022610~biological adhesion	39	0.1018	4.14119e-06	NM_001792, NM_016533, NM_001941, NM_022121, NM_000130, NM_001504, NM_080792, NM_013281, NM_005769, NM_198148, NM_002543, NM_006182, NM_005010, NM_021101, NM_005245, NM_005727, NM_005168, NM_177557, NM_001407, NM_000072, NM_017671, NM_015719, NM_001555, NM_001769, NM_014795, NM_000442, NM_032119, NM_015059, NM_004533, NM_001767, NM_018556, NM_024422, NM_001943, NM_001999, NM_005562, NM_004360, NM_…	306	672	11809	2.23969	0.0213	0.007151	0.007913
GOTERM_BP_ALL	GO:0007155~cell adhesion	39	0.1018	4.14119e-06	NM_001792, NM_016533, NM_001941, NM_022121, NM_000130, NM_001504, NM_080792, NM_013281, NM_005769, NM_198148, NM_002543, NM_006182, NM_005010, NM_021101, NM_005245, NM_005727, NM_005168, NM_177557, NM_001407, NM_000072, NM_017671, NM_015719, NM_001555, NM_001769, NM_014795, NM_000442, NM_032119, NM_015059, NM_004533, NM_001767, NM_018556, NM_024422, NM_001943, NM_001999, NM_005562, NM_004360, NM_…	306	672	11809	2.23969	0.0213	0.007151	0.007913
GOTERM_BP_ALL	GO:0009605~response to external stimulus	35	0.0914	2.29997e-05	NM_016533, NM_004887, NM_000952, NM_004942, NM_000295, NM_001105, NM_004591, NM_002188, NM_000905, NM_000130, NM_001504, NM_002659, NM_006528, NM_005769, NM_002543, NM_000301, NM_000647, NM_002001, NM_002987, NM_002981, NM_000072, NM_000397, NM_000575, NM_001769, NM_000035, NM_001200, NM_000442, NM_198174, NM_002045, NM_001801, NM_002964, NM_002658, NM_006274, NM_001552, NM_006419,	306	616	11809	2.1927	0.112704	0.0294518	0.0439405
GOTERM_BP_ALL	GO:0007154~cell communication	115	0.3003	0.000143093	NM_005139, NM_002744, NM_002036, NM_025106, NM_145057, NM_000905, NM_001450, NM_001465, NM_015976, NM_148970, NM_014677, NM_181361, NM_013439, NM_000939, NM_000442, NM_139316, NM_004861, NM_018654, NM_005012, NM_001552, NM_006183, NM_148901, NM_000598, NM_022652, NM_004887, NM_014392, NM_005460, NM_002841, NM_002659, NM_003489, NM_003887, NM_005795, NM_014978, NM_005767, NM_004296, NM_003559, NM_…	306	3281	11809	1.35264	0.524788	0.138258	0.27308
GOTERM_BP_ALL	GO:0016337~cell-cell adhesion	18	0.047	0.000190843	NM_001792, NM_016533, NM_001941, NM_014795, NM_032119, NM_001767, NM_005010, NM_018556, NM_024422, NM_001943, NM_021101, NM_001999, NM_004360, NM_005245, NM_003181, NM_177557, NM_001407, NM_080682,	306	243	11809	2.85863	0.629272	0.152429	0.364047
GOTERM_BP_ALL	GO:0006954~inflammatory response	20	0.0522	0.000207884	NM_000397, NM_004887, NM_000952, NM_000575, NM_000295, NM_001105, NM_004591, NM_002188, NM_001200, NM_005769, NM_001801, NM_002543, NM_002964, NM_000647, NM_002001, NM_002987, NM_006274, NM_001552, NM_002981, NM_006419,	306	292	11809	2.64325	0.66071	0.143083	0.396494
GOTERM_BP_ALL	GO:0042330~taxis	13	0.0339	0.000289147	NM_004887, NM_000575, NM_000952, NM_004942, NM_004591, NM_001504, NM_002659, NM_000647, NM_002658, NM_002987, NM_006274, NM_002981, NM_006419,	306	141	11809	3.55808	0.777647	0.153847	0.55108
GOTERM_BP_ALL	GO:0006935~chemotaxis	13	0.0339	0.000289147	NM_004887, NM_000575, NM_000952, NM_004942, NM_004591, NM_001504, NM_002659, NM_000647, NM_002658, NM_002987, NM_006274, NM_002981, NM_006419,	306	141	11809	3.55808	0.777647	0.153847	0.55108
GOTERM_BP_ALL	GO:0007626~locomotory behavior	15	0.0392	0.000333269	NM_004887, NM_000575, NM_000952, NM_004942, NM_004591, NM_001504, NM_002659, NM_152296, NM_002658, NM_000647, NM_002987, NM_005410, NM_006274, NM_002981, NM_006419,	306	186	11809	3.11222	0.823239	0.159111	0.634918
GOTERM_BP_ALL	GO:0006952~defense response	28	0.0731	0.000680725	NM_004887, NM_002036, NM_000952, NM_004942, NM_000295, NM_001105, NM_002188, NM_004591, NM_005769, NM_002543, NM_000647, NM_002351, NM_002001, NM_002987, NM_005423, NM_002981, NM_000397, NM_139176, NM_000575, NM_001200, NM_006864, NM_001801, NM_002964, NM_024119, NM_006274, NM_001552, NM_006419, NM_002051,	306	535	11809	2.01974	0.970995	0.27519	1.2928
GOTERM_BP_ALL	GO:0042060~wound healing	11	0.0287	0.00101132	NM_000072, NM_000301, NM_016533, NM_002658, NM_000295, NM_001769, NM_000130, NM_000442, NM_198174, NM_002659, NM_006528,	306	119	11809	3.56728	0.994807	0.354917	1.91491
GOTERM_BP_ALL	GO:0007267~cell-cell signaling	31	0.0809	0.00103558	NM_004887, NM_004591, NM_002188, NM_000905, NM_005460, NM_003333, NM_005769, NM_014677, NM_002351, NM_183393, NM_002001, NM_002987, NM_005245, NM_181361, NM_000044, NM_002981, NM_000575, NM_000840, NM_000939, NM_002065, NM_133642, NM_003326, NM_001233, NM_198212, NM_001769, NM_001200, NM_139316, NM_018556, NM_004861, NM_006419, NM_002051, NM_005651,	306	636	11809	1.88103	0.995423	0.339241	1.96042
GOTERM_BP_ALL	GO:0065008~regulation of biological quality	36	0.094	0.00173244	NM_001353, NM_004594, NM_145057, NM_000295, NM_000905, NM_003333, NM_000130, NM_007127, NM_001504, NM_002659, NM_006528, NM_152296, NM_000301, NM_000647, NM_000044, NM_181361, NM_177557, NM_002981, NM_001401, NM_000072, NM_000575, NM_032935, NM_000939, NM_133642, NM_003877, NM_001233, NM_198212, NM_001769, NM_032119, NM_002045, NM_002658, NM_004861, NM_001552, NM_006274, NM_000598, NM_006183, NM_…	306	807	11809	1.72155	0.999878	0.474766	3.25906
GOTERM_BP_ALL	GO:0032501~multicellular organismal process	104	0.2715	0.00206962	NM_016533, NM_001353, NM_001182, NM_022443, NM_000295, NM_000905, NM_013999, NM_000301, NM_006623, NM_181361, NM_000382, NM_001888, NM_033140, NM_015719, NM_000939, NM_001354, NM_139316, NM_004861, NM_005562, NM_018654, NM_001552, NM_006183, NM_000598, NM_003061, NM_001792, NM_005460, NM_002659, NM_003489, NM_005795, NM_178012, NM_002987, NM_145263, NM_006895, NM_003507, NM_000044, NM_002546, NM_…	306	3107	11809	1.29177	0.999979	0.51231	3.88155
GOTERM_BP_ALL	GO:0007610~behavior	18	0.047	0.00289988	NM_004887, NM_000575, NM_000952, NM_004942, NM_004591, NM_000905, NM_001964, NM_001504, NM_002659, NM_152296, NM_003383, NM_002658, NM_000647, NM_002987, NM_005410, NM_006274, NM_002981, NM_006419,	306	310	11809	2.2408	1	0.610794	5.39819
GOTERM_BP_ALL	GO:0007165~signal transduction	98	0.2559	0.00356234	NM_002744, NM_005139, NM_002036, NM_025106, NM_145057, NM_000905, NM_001450, NM_001465, NM_148970, NM_014677, NM_013439, NM_000939, NM_000442, NM_018654, NM_005012, NM_001552, NM_006183, NM_148901, NM_000598, NM_022652, NM_004887, NM_014392, NM_002841, NM_002659, NM_003489, NM_003887, NM_005795, NM_014978, NM_005767, NM_004296, NM_003559, NM_002987, NM_015310, NM_003507, NM_000044, NM_002546, NM_…	306	2942	11809	1.28551	1	0.664252	6.59203
GOTERM_BP_ALL	GO:0002376~immune system process	34	0.0888	0.00420541	NM_022555, NM_004887, NM_000952, NM_004942, NM_022443, NM_004591, NM_002188, NM_017935, NM_020056, NM_001465, NM_005769, NM_018284, NM_000948, NM_002543, NM_148970, NM_000647, NM_004951, NM_002351, NM_002001, NM_002987, NM_182549, NM_002981, NM_002221, NM_004833, NM_000575, NM_003326, NM_002342, NM_001964, NM_006864, NM_024119, NM_001767, NM_018556, NM_006274, NM_006419,	306	790	11809	1.6609	1	0.703949	7.73725
GOTERM_BP_ALL	GO:0048513~organ development	47	0.1227	0.00476481	NM_001792, NM_016533, NM_022443, NM_001105, NM_000867, NM_153427, NM_003333, NM_004329, NM_003489, NM_005795, NM_000948, NM_000163, NM_000301, NM_006623, NM_000044, NM_003975, NM_002546, NM_000382, NM_004245, NM_002221, NM_015719, NM_133642, NM_001233, NM_198212, NM_018419, NM_001964, NM_000478, NM_005249, NM_001200, NM_014476, NM_198174, NM_003221, NM_032119, NM_003213, NM_001767, NM_001463, NM_…	306	1211	11809	1.49777	1	0.729347	8.72263
GOTERM_BP_ALL	GO:0006955~immune response	27	0.0705	0.00489314	NM_022555, NM_004887, NM_000952, NM_004942, NM_002188, NM_004591, NM_020056, NM_001465, NM_005769, NM_018284, NM_148970, NM_002543, NM_000647, NM_002351, NM_002001, NM_004951, NM_002987, NM_182549, NM_002981, NM_004833, NM_000575, NM_003326, NM_002342, NM_006864, NM_024119, NM_006274, NM_006419,	306	585	11809	1.78115	1	0.720595	8.94727
GOTERM_CC_ALL	GO:0044459~plasma membrane part	71	0.1854	9.14662e-05	NM_002744, NM_013233, NM_000340, NM_022555, NM_016533, NM_000952, NM_001941, NM_022121, NM_005630, NM_003383, NM_000163, NM_148970, NM_006182, NM_000647, NM_002001, NM_183393, NM_005010, NM_000891, NM_021101, NM_181361, NM_000397, NM_001233, NM_198212, NM_001769, NM_017954, NM_000442, NM_006864, NM_003759, NM_015059, NM_001732, NM_139316, NM_004861, NM_012449, NM_005012, NM_004389, NM_001792, NM_…	332	1697	12455	1.56958	0.0752272	0.0752272	0.141533
GOTERM_CC_ALL	GO:0005886~plasma membrane	95	0.248	0.000246593	NM_002744, NM_013233, NM_000340, NM_022555, NM_016533, NM_000952, NM_002036, NM_001941, NM_022121, NM_145057, NM_005630, NM_002354, NM_003383, NM_000163, NM_148970, NM_006182, NM_018242, NM_000647, NM_002001, NM_183393, NM_005010, NM_000891, NM_021101, NM_181361, NM_001407, NM_000397, NM_013439, NM_001233, NM_198212, NM_001769, NM_000442, NM_017954, NM_033049, NM_032119, NM_006864, NM_003759, NM_…	332	2535	12455	1.40589	0.190115	0.100064	0.381146
GOTERM_CC_ALL	GO:0030054~cell junction	21	0.0548	0.00165873	NM_002744, NM_001792, NM_017671, NM_001941, NM_022121, NM_001233, NM_198212, NM_017954, NM_000442, NM_002045, NM_015059, NM_032866, NM_183393, NM_139316, NM_024422, NM_001943, NM_021101, NM_012449, NM_004360, NM_004389, NM_015310, NM_005245,	332	362	12455	2.17629	0.758139	0.376951	2.53777
GOTERM_CC_ALL	GO:0005887~integral to plasma membrane	47	0.1227	0.0042272	NM_000340, NM_022555, NM_016533, NM_000952, NM_004615, NM_001105, NM_000867, NM_002841, NM_005630, NM_020056, NM_001504, NM_013281, NM_152296, NM_005795, NM_002543, NM_000163, NM_014379, NM_148970, NM_005277, NM_201591, NM_006182, NM_000647, NM_004951, NM_002001, NM_005010, NM_000891, NM_021101, NM_005512, NM_005245, NM_181361, NM_177557, NM_001401, NM_013269, NM_000397, NM_000072, NM_000840, NM_…	332	1167	12455	1.51089	0.973269	0.595652	6.34881
GOTERM_CC_ALL	GO:0031226~intrinsic to plasma membrane	47	0.1227	0.00524968	NM_000340, NM_022555, NM_016533, NM_000952, NM_004615, NM_001105, NM_000867, NM_002841, NM_005630, NM_020056, NM_001504, NM_013281, NM_152296, NM_005795, NM_002543, NM_000163, NM_014379, NM_148970, NM_005277, NM_201591, NM_006182, NM_000647, NM_004951, NM_002001, NM_005010, NM_000891, NM_021101, NM_005512, NM_005245, NM_181361, NM_177557, NM_001401, NM_013269, NM_000397, NM_000072, NM_000840, NM_…	332	1182	12455	1.49172	0.988894	0.593455	7.82679
GOTERM_MF_ALL	GO:0001664~G-protein-coupled receptor binding	9	0.0235	0.000441976	NM_004887, NM_000647, NM_002987, NM_014392, NM_004591, NM_000905, NM_006274, NM_002981, NM_006419,	327	71	12738	4.93785	0.71418	0.71418	0.787832
GOTERM_MF_ALL	GO:0042379~chemokine receptor binding	7	0.0183	0.00118988	NM_004887, NM_000647, NM_002987, NM_004591, NM_006274, NM_002981, NM_006419,	327	47	12738	5.80168	0.965712	0.814829	2.10766
GOTERM_MF_ALL	GO:0016702~oxidoreductase activity, acting on single donors with incorporation of molecular oxygen, incorporation of two atoms of oxygen	7	0.0183	0.00246463	NM_001801, NM_006618, NM_018192, NM_000935, NM_182943, NM_032756, NM_003986, NM_005651,	327	54	12738	5.04961	0.99908	0.902734	4.31908
GOTERM_MF_ALL	GO:0051213~dioxygenase activity	7	0.0183	0.00246463	NM_001801, NM_006618, NM_018192, NM_000935, NM_182943, NM_032756, NM_003986, NM_005651,	327	54	12738	5.04961	0.99908	0.902734	4.31908
GOTERM_MF_ALL	GO:0016701~oxidoreductase activity, acting on single donors with incorporation of molecular oxygen	7	0.0183	0.00270809	NM_001801, NM_006618, NM_018192, NM_000935, NM_182943, NM_032756, NM_003986, NM_005651,	327	55	12738	4.9578	0.999539	0.784864	4.73603
GOTERM_MF_ALL	GO:0004872~receptor activity	53	0.1384	0.00276579	NM_002744, NM_022555, NM_002036, NM_000952, NM_000905, NM_020297, NM_000857, NM_148970, NM_000163, NM_003383, NM_000647, NM_006182, NM_002001, NM_000627, NM_001407, NM_013439, NM_032119, NM_006864, NM_001732, NM_174941, NM_018654, NM_005012, NM_148901, NM_001105, NM_000867, NM_002841, NM_020056, NM_001504, NM_002659, NM_004329, NM_005795, NM_003243, NM_002543, NM_020440, NM_080684, NM_004951, NM_…	327	1382	12738	1.4939	0.999609	0.729565	4.8346
GOTERM_MF_ALL	GO:0004888~transmembrane receptor activity	36	0.094	0.00364985	NM_022555, NM_000952, NM_002036, NM_001105, NM_000905, NM_000867, NM_002841, NM_020056, NM_001504, NM_004329, NM_020297, NM_005795, NM_002543, NM_003383, NM_000163, NM_148970, NM_006182, NM_000647, NM_004951, NM_002001, NM_014978, NM_005767, NM_182549, NM_000627, NM_003507, NM_001407, NM_001401, NM_013269, NM_000840, NM_002342, NM_032119, NM_006864, NM_174941, NM_018654, NM_005012, NM_148901,	327	851	12738	1.64788	0.999968	0.772328	6.3328
GOTERM_MF_ALL	GO:0004871~signal transducer activity	64	0.1671	0.00414828	NM_002744, NM_013233, NM_022555, NM_000952, NM_002036, NM_002188, NM_000905, NM_015668, NM_020297, NM_003383, NM_000163, NM_000857, NM_148970, NM_006182, NM_000647, NM_002001, NM_002351, NM_000627, NM_001407, NM_013439, NM_003877, NM_032119, NM_006864, NM_001732, NM_174941, NM_018654, NM_005012, NM_148901, NM_001105, NM_000867, NM_002841, NM_020056, NM_001504, NM_002659, NM_004329, NM_013281, NM_…	327	1780	12738	1.4006	0.999992	0.770549	7.16764
GOTERM_MF_ALL	GO:0060089~molecular transducer activity	64	0.1671	0.00414828	NM_002744, NM_013233, NM_022555, NM_000952, NM_002036, NM_002188, NM_000905, NM_015668, NM_020297, NM_003383, NM_000163, NM_000857, NM_148970, NM_006182, NM_000647, NM_002001, NM_002351, NM_000627, NM_001407, NM_013439, NM_003877, NM_032119, NM_006864, NM_001732, NM_174941, NM_018654, NM_005012, NM_148901, NM_001105, NM_000867, NM_002841, NM_020056, NM_001504, NM_002659, NM_004329, NM_013281, NM_…	327	1780	12738	1.4006	0.999992	0.770549	7.16764
KEGG_PATHWAY	hsa04060:Cytokine-cytokine receptor interaction	20	0.0522	0.000303607	NM_004887, NM_000575, NM_003326, NM_001105, NM_002342, NM_004591, NM_002188, NM_001504, NM_001200, NM_004329, NM_000948, NM_000163, NM_148970, NM_000647, NM_002987, NM_006274, NM_148901, NM_002981, NM_002546, NM_006419,	128	249	3953	2.48055	0.0592089	0.0592089	0.380184

## Sheet: Enrichment of outliers in YRI
Category	Term	Count	%	PValue	Genes	List Total	Pop Hits	Pop Total	Fold Enrichment	Bonferroni	Benjamini	FDR
GOTERM_BP_ALL	GO:0002376~immune system process	31	0.108	5.75315e-05	NM_000222, NM_002124, NM_002125, NM_004106, NM_005461, NM_002432, NM_000732, NM_012092, NM_003121, NM_001242, NM_016382, NM_002621, NM_194448, NM_002286, NM_002119, NM_001547, NM_001765, NM_004513, NM_004001, NM_002199, NM_009588, NM_001549, NM_002133, NM_001806, NM_005356, NM_020661, NM_000619, NM_002215, NM_005475, NM_006866, NM_005532, NM_003123,	210	790	11809	2.20662	0.258526	0.258526	0.109878
GOTERM_BP_ALL	GO:0006955~immune response	24	0.0836	0.000275095	NM_004001, NM_002124, NM_002125, NM_004106, NM_002432, NM_002199, NM_012092, NM_009588, NM_001549, NM_002133, NM_001806, NM_001242, NM_016382, NM_005356, NM_000619, NM_002621, NM_194448, NM_002286, NM_002119, NM_006866, NM_001547, NM_005532, NM_001765, NM_004513, NM_003123,	210	585	11809	2.30701	0.76079	0.510909	0.524365
GOTERM_BP_ALL	GO:0001775~cell activation	13	0.0453	0.000637888	NM_004106, NM_000732, NM_001246, NM_002133, NM_001806, NM_001242, NM_020661, NM_005356, NM_000619, NM_002215, NM_002286, NM_002119, NM_003123,	210	224	11809	3.26354	0.963754	0.669058	1.21191
GOTERM_BP_ALL	GO:0045321~leukocyte activation	12	0.0418	0.000760209	NM_005356, NM_020661, NM_000619, NM_004106, NM_002215, NM_002286, NM_000732, NM_002119, NM_002133, NM_001806, NM_001242, NM_003123,	210	197	11809	3.42538	0.980819	0.62785	1.44271
GOTERM_BP_ALL	GO:0002520~immune system development	12	0.0418	0.00126397	NM_005356, NM_020661, NM_000222, NM_000619, NM_005461, NM_000732, NM_005475, NM_002119, NM_001806, NM_003121, NM_001242, NM_003123,	210	210	11809	3.21333	0.998606	0.731555	2.38785
GOTERM_BP_ALL	GO:0030097~hemopoiesis	11	0.0383	0.00174221	NM_005356, NM_020661, NM_000222, NM_005461, NM_000732, NM_005475, NM_002119, NM_001806, NM_003121, NM_001242, NM_003123,	210	186	11809	3.32563	0.999884	0.779298	3.27715
GOTERM_BP_ALL	GO:0030098~lymphocyte differentiation	7	0.0244	0.00223349	NM_005356, NM_020661, NM_000732, NM_002119, NM_001806, NM_001242, NM_003123,	210	76	11809	5.17939	0.999991	0.809995	4.18271
GOTERM_BP_ALL	GO:0002443~leukocyte mediated immunity	7	0.0244	0.00238722	NM_000619, NM_004106, NM_002286, NM_002133, NM_001806, NM_001242, NM_003123,	210	77	11809	5.11212	0.999996	0.78844	4.4644
GOTERM_BP_ALL	GO:0048534~hemopoietic or lymphoid organ development	11	0.0383	0.00285644	NM_005356, NM_020661, NM_000222, NM_005461, NM_000732, NM_005475, NM_002119, NM_001806, NM_003121, NM_001242, NM_003123,	210	199	11809	3.10838	1	0.808416	5.31941
GOTERM_BP_ALL	GO:0002521~leukocyte differentiation	8	0.0279	0.00287986	NM_005356, NM_020661, NM_000732, NM_002119, NM_001806, NM_003121, NM_001242, NM_003123,	210	107	11809	4.20436	1	0.776736	5.36189
GOTERM_BP_ALL	GO:0002252~immune effector process	8	0.0279	0.00353577	NM_000619, NM_004106, NM_002621, NM_002286, NM_002133, NM_001806, NM_001242, NM_003123,	210	111	11809	4.05285	1	0.812522	6.54442
GOTERM_BP_ALL	GO:0006917~induction of apoptosis	11	0.0383	0.00378643	NM_005356, NM_004350, NM_033238, NM_002286, NM_014326, NM_014380, NM_032992, NM_002133, NM_001806, NM_001242, NM_003123,	210	207	11809	2.98824	1	0.806714	6.99261
GOTERM_BP_ALL	GO:0012502~induction of programmed cell death	11	0.0383	0.0039167	NM_005356, NM_004350, NM_033238, NM_002286, NM_014326, NM_014380, NM_032992, NM_002133, NM_001806, NM_001242, NM_003123,	210	208	11809	2.97388	1	0.791841	7.22475
GOTERM_BP_ALL	GO:0051247~positive regulation of protein metabolic process	7	0.0244	0.00439648	NM_000619, NM_033238, NM_013261, NM_006779, NM_001806, NM_001242, NM_003123,	210	87	11809	4.52452	1	0.805294	8.07493
GOTERM_BP_ALL	GO:0043065~positive regulation of apoptosis	12	0.0418	0.00465805	NM_005356, NM_000693, NM_004350, NM_033238, NM_002286, NM_014326, NM_014380, NM_032992, NM_002133, NM_001806, NM_001242, NM_003123,	210	248	11809	2.72097	1	0.801755	8.53534
GOTERM_BP_ALL	GO:0051246~regulation of protein metabolic process	13	0.0453	0.00467014	NM_004094, NM_006216, NM_033238, NM_003758, NM_013261, NM_006779, NM_001806, NM_001242, NM_000619, NM_002286, NM_006946, NM_182485, NM_003123,	210	284	11809	2.57406	1	0.78152	8.55657
GOTERM_BP_ALL	GO:0001816~cytokine production	8	0.0279	0.00472567	NM_000619, NM_004106, NM_002286, NM_005502, NM_002133, NM_001806, NM_001242, NM_003123,	210	117	11809	3.84501	1	0.765112	8.65401
GOTERM_BP_ALL	GO:0043068~positive regulation of programmed cell death	12	0.0418	0.00494055	NM_005356, NM_000693, NM_004350, NM_033238, NM_002286, NM_014326, NM_014380, NM_032992, NM_002133, NM_001806, NM_001242, NM_003123,	210	250	11809	2.6992	1	0.760819	9.03013
GOTERM_CC_ALL	GO:0009897~external side of plasma membrane	8	0.0279	0.000202763	NM_000222, NM_000887, NM_004106, NM_002286, NM_012092, NM_000212, NM_003123, NM_016382,	234	65	12455	6.55095	0.159182	0.159182	0.3135
GOTERM_CC_ALL	GO:0009986~cell surface	11	0.0383	0.000851759	NM_000222, NM_000887, NM_004106, NM_012281, NM_022468, NM_002286, NM_012092, NM_002033, NM_000212, NM_003123, NM_016382,	234	160	12455	3.65932	0.517399	0.305305	1.31077
GOTERM_CC_ALL	GO:0044459~plasma membrane part	49	0.1707	0.0019503	NM_000222, NM_024421, NM_153206, NM_002124, NM_002125, NM_001338, NM_012092, NM_201636, NM_194448, NM_005602, NM_002286, NM_206837, NM_001765, NM_153322, NM_005303, NM_005127, NM_012307, NM_005306, NM_001682, NM_005682, NM_002133, NM_018725, NM_000212, NM_000887, NM_139244, NM_175920, NM_003979, NM_001980, NM_002428, NM_004106, NM_005470, NM_000732, NM_001712, NM_016382, NM_001242, NM_012281, NM_…	234	1697	12455	1.53689	0.81159	0.426718	2.97758
GOTERM_CC_ALL	GO:0005887~integral to plasma membrane	35	0.122	0.00612458	NM_024421, NM_002428, NM_001338, NM_002124, NM_002125, NM_004106, NM_012092, NM_001712, NM_001242, NM_201636, NM_012281, NM_194448, NM_002286, NM_005502, NM_000869, NM_001065, NM_001765, NM_153322, NM_005303, NM_005127, NM_003105, NM_000913, NM_000951, NM_005306, NM_001682, NM_000956, NM_005682, NM_018725, NM_000212, NM_005211, NM_000887, NM_139244, NM_175920, NM_003979, NM_000906, NM_003123,	234	1167	12455	1.59634	0.994766	0.73103	9.07408
GOTERM_MF_ALL	GO:0004888~transmembrane receptor activity	28	0.0976	0.00206509	NM_000222, NM_201264, NM_002124, NM_002125, NM_004106, NM_000732, NM_032404, NM_153837, NM_001242, NM_201636, NM_194448, NM_002286, NM_000869, NM_001065, NM_002119, NM_005303, NM_000860, NM_003105, NM_000913, NM_005306, NM_000956, NM_005682, NM_018725, NM_005211, NM_003979, NM_000906, NM_005567, NM_004442, NM_017449, NM_003123,	225	851	12738	1.86272	0.997139	0.997139	3.6311
