# Supplementary material for: Gene Expression Variability within and between Human Populations and Implications toward Disease Susceptibility
Source: PLoS Comput Biol. 2010 Aug 26;6(8):e1000910. doi: 10.1371/journal.pcbi.1000910 (PMC2928754; doi:10.1371/journal.pcbi.1000910)
Supplement: Table S4 — The complete list of enriched functional categories for genes showing the least and the most expression fluctuation (only categories with FDR<0.1 are listed). (0.93 MB XLS) [file pcbi.1000910.s009.xls]

## Sheet: The most variable genes
	Category	Term	PValue	Genes	Fold Enrichment	FDR
	GENETIC_ASSOCIATION_DB_DISEASE	hepatocellular carcinoma	0.00152654	NM_021983, NM_000853, NM_000576, NM_005607, NM_053056,	9.20518	2.93029
	GENETIC_ASSOCIATION_DB_DISEASE	osteoarthritis	0.00156295	NM_021983, NM_000877, NM_000584, NM_000576, NM_007115, NM_000618, NM_000376, NM_004795,	4.48252	2.99917
	GENETIC_ASSOCIATION_DB_DISEASE	psoriasis	0.00195434	NM_021983, NM_000853, NM_001559, NM_002116, NM_005037, NM_016584, NM_000376, NM_000499, NM_001955,	3.8028	3.73675
	GENETIC_ASSOCIATION_DB_DISEASE	heart disease, ischemic	0.00211324	NM_001992, NM_005037, NM_000305, NM_000655, NM_000775, NM_000078, NM_004137,	5.01171	4.03467
	GENETIC_ASSOCIATION_DB_DISEASE	asthma	0.00228442	NM_021983, NM_000690, NM_001559, NM_080591, NM_002116, NM_000576, NM_024420, NM_000499, NM_001955, NM_003745, NM_000853, NM_000775, NM_003467, NM_138379, NM_000376, NM_001560,	2.35653	4.35464
	GENETIC_ASSOCIATION_DB_DISEASE	skin cancer, non-melanoma	0.00431466	NM_000853, NM_000584, NM_000576, NM_005037, NM_000499, NM_053056,	5.33266	8.07322
	GENETIC_ASSOCIATION_DB_DISEASE	Q fever	0.00509683	NM_021983, NM_000877, NM_000576, NM_000655, NM_000376,	6.78277	9.4689
	GENETIC_ASSOCIATION_DB_DISEASE_CLASS	AGING	0.00101342	NM_016831, NM_000853, NM_000584, NM_000576, NM_002116, NM_005037, NM_002649, NM_000104, NM_000078, NM_000376, NM_000499, NM_004795,	3.17686	0.757009
	GENETIC_ASSOCIATION_DB_DISEASE_CLASS	NEUROLOGICAL	0.00489313	NM_021983, NM_021076, NM_002116, NM_000576, NM_000078, NM_000104, NM_000853, NM_000877, NM_006096, NM_153047, NM_005037, NM_002984, NM_000376, NM_000355, NM_178145, NM_000399, NM_000690, NM_016818, NM_001512, NM_000305, NM_138992, NM_006398, NM_171829, NM_000499, NM_004795, NM_002729, NM_016831, NM_000584, NM_000784, NM_173173, NM_000274,	1.61147	3.60938
	GNF_U133A_QUARTILE	globuspallidus_3rd	7.06079e-11	NM_006435, NM_018295, NM_020481, NM_004385, NM_005797, NM_003982, NM_006255, NM_004075, NM_001748, NM_023926, NM_003271, NM_018660, NM_004799, NM_006825, NM_001387, NM_012445, NM_018349, NM_001992, NM_144710, NM_033274, NM_001512, NM_006291, NM_005607, NM_001955, NM_000093, NM_003032, NM_003311, NM_002966, NM_018265, NM_000784, NM_000422, NM_001448, NM_018110, NM_013279, NM_000618, NM_002923, NM_…	1.88975	7.46877e-08
	GNF_U133A_QUARTILE	subthalamicnucleus_3rd	1.40815e-10	NM_001548, NM_080591, NM_004385, NM_181671, NM_012121, NM_023926, NM_139351, NM_006096, NM_147130, NM_153047, NM_004799, NM_178145, NM_003812, NM_001387, NM_001197, NM_144710, NM_003706, NM_005928, NM_002247, NM_005607, NM_018013, NM_172234, NM_000093, NM_001955, NM_130843, NM_003896, NM_033135, NM_173173, NM_000784, NM_000274, NM_000775, NM_022834, NM_001975, NM_001448, NM_021076, NM_145804, NM_…	1.74673	1.48951e-07
	GNF_U133A_QUARTILE	Medulla Oblongata_3rd	1.44093e-09	NM_006435, NM_080591, NM_002116, NM_018295, NM_005265, NM_003982, NM_181671, NM_006255, NM_017572, NM_145344, NM_023926, NM_001748, NM_024667, NM_012121, NM_016619, NM_003271, NM_153047, NM_018027, NM_018660, NM_006825, NM_178145, NM_001387, NM_012445, NM_001197, NM_025080, NM_005928, NM_006291, NM_014241, NM_000093, NM_001955, NM_003896, NM_002966, NM_003311, NM_000784, NM_018265, NM_152918, NM_…	1.56318	1.52418e-06
	GNF_U133A_QUARTILE	Pancreatic Islets_3rd	2.84893e-08	NM_017786, NM_005797, NM_005265, NM_004063, NM_015271, NM_006096, NM_023016, NM_005037, NM_139030, NM_016816, NM_000376, NM_006825, NM_013230, NM_015888, NM_144710, NM_018168, NM_006398, NM_000093, NM_007021, NM_001482, NM_003311, NM_002966, NM_018265, NM_152918, NM_005855, NM_017688, NM_002923, NM_001785, NM_004093, NM_021603, NM_014883, NM_000358, NM_002448, NM_004751, NM_005860, NM_005560, NM_…	2.2265	3.01354e-05
	GNF_U133A_QUARTILE	Ovary_3rd	3.02825e-07	NM_021983, NM_006435, NM_018295, NM_020682, NM_000104, NM_012121, NM_015271, NM_006096, NM_153047, NM_023016, NM_018027, NM_139211, NM_015691, NM_005195, NM_001387, NM_012447, NM_007069, NM_001992, NM_006365, NM_018168, NM_144710, NM_002863, NM_173558, NM_000170, NM_014241, NM_001955, NM_000093, NM_007021, NM_001482, NM_018384, NM_015213, NM_002510, NM_002966, NM_173173, NM_022334, NM_030776, NM_…	1.64763	0.000320322
	GNF_U133A_QUARTILE	Trigeminal Ganglion_3rd	6.80973e-07	NM_021983, NM_000576, NM_017640, NM_005797, NM_000104, NM_001748, NM_012121, NM_016619, NM_139030, NM_016816, NM_006825, NM_001387, NM_004137, NM_013230, NM_001197, NM_144710, NM_005928, NM_006291, NM_002247, NM_006398, NM_000499, NM_000093, NM_007021, NM_002510, NM_018265, NM_173173, NM_000274, NM_000422, NM_000618, NM_015535, NM_001449, NM_006018, NM_018004, NM_002145, NM_015570, NM_016507, NM_…	1.88831	0.000720318
	GNF_U133A_QUARTILE	Pancreas_3rd	3.60919e-06	NM_006435, NM_018295, NM_004385, NM_005265, NM_006255, NM_145344, NM_004075, NM_024667, NM_012121, NM_022369, NM_000351, NM_003271, NM_006096, NM_018660, NM_006825, NM_012445, NM_018349, NM_144710, NM_033274, NM_002863, NM_005928, NM_001512, NM_006291, NM_005607, NM_000093, NM_001955, NM_003311, NM_018265, NM_000775, NM_000422, NM_022834, NM_052905, NM_001448, NM_145804, NM_001785, NM_015535, NM_…	1.47755	0.00381767
	GNF_U133A_QUARTILE	dorsal root ganglia_3rd	4.12724e-06	NM_001548, NM_017786, NM_003885, NM_016155, NM_023926, NM_012121, NM_139351, NM_000351, NM_015271, NM_000376, NM_003812, NM_015087, NM_001387, NM_006365, NM_003706, NM_031412, NM_005607, NM_002247, NM_018013, NM_172234, NM_000093, NM_130843, NM_130791, NM_001482, NM_015213, NM_006209, NM_022334, NM_022893, NM_000775, NM_022834, NM_001975, NM_005855, NM_017688, NM_016083, NM_004789, NM_013279, NM_…	1.76863	0.00436563
	GNF_U133A_QUARTILE	skin_3rd	6.41394e-06	NM_021983, NM_000576, NM_018295, NM_002120, NM_005797, NM_000104, NM_006255, NM_004468, NM_145344, NM_001748, NM_015271, NM_002844, NM_023016, NM_000376, NM_013230, NM_000655, NM_005607, NM_002247, NM_006398, NM_002510, NM_003032, NM_033135, NM_000784, NM_173173, NM_000274, NM_022893, NM_000422, NM_005574, NM_001448, NM_017688, NM_000618, NM_014859, NM_015535, NM_030915, NM_001781, NM_004524, NM_…	1.76629	0.00678433
	GNF_U133A_QUARTILE	lymphomaburkittsDaudi_3rd	2.43814e-05	NM_001548, NM_021983, NM_002116, NM_018295, NM_002120, NM_000078, NM_000104, NM_003982, NM_006255, NM_003175, NM_016619, NM_003271, NM_153047, NM_147130, NM_016816, NM_000376, NM_178145, NM_012447, NM_013230, NM_016269, NM_144710, NM_033274, NM_003706, NM_173558, NM_006291, NM_000655, NM_006398, NM_007021, NM_130791, NM_018384, NM_002510, NM_003032, NM_006209, NM_005292, NM_000784, NM_017631, NM_…	1.59059	0.0257872
	GNF_U133A_QUARTILE	Uterus Corpus_3rd	0.000107472	NM_006868, NM_053001, NM_006435, NM_004385, NM_000104, NM_005797, NM_004075, NM_023926, NM_001748, NM_012121, NM_003271, NM_053039, NM_018660, NM_139030, NM_006825, NM_015087, NM_033512, NM_005195, NM_001387, NM_004137, NM_013230, NM_016303, NM_012445, NM_025176, NM_144710, NM_033274, NM_005928, NM_005607, NM_014241, NM_002247, NM_024420, NM_000093, NM_007021, NM_000321, NM_002510, NM_006209, NM_…	1.43231	0.113624
	GNF_U133A_QUARTILE	Liver_3rd	0.00014504	NM_004097, NM_021983, NM_018295, NM_003982, NM_005265, NM_001748, NM_003175, NM_006096, NM_053039, NM_000376, NM_178145, NM_013230, NM_025176, NM_031412, NM_006398, NM_000170, NM_172234, NM_000093, NM_001482, NM_130791, NM_003032, NM_018265, NM_000784, NM_017688, NM_003740, NM_004944, NM_021603, NM_000853, NM_145731, NM_020676, NM_002145, NM_001321, NM_000355, NM_004276, NM_000690, NM_006829, NM_…	1.70833	0.153314
	GNF_U133A_QUARTILE	bronchialepithelialcells_3rd	0.00015386	NM_002068, NM_021983, NM_006868, NM_006435, NM_002116, NM_001974, NM_020481, NM_002120, NM_004468, NM_003175, NM_016619, NM_000376, NM_006825, NM_015087, NM_012447, NM_013230, NM_018349, NM_033274, NM_002863, NM_173558, NM_000655, NM_004441, NM_001295, NM_003896, NM_003032, NM_152918, NM_005574, NM_018641, NM_017688, NM_007115, NM_002923, NM_001785, NM_003534, NM_021018, NM_016326, NM_024761, NM_…	1.59918	0.162631
	GNF_U133A_QUARTILE	Thymus_3rd	0.000569098	NM_001548, NM_017786, NM_006255, NM_004468, NM_003885, NM_030792, NM_023926, NM_012121, NM_139351, NM_015271, NM_000351, NM_006096, NM_003812, NM_001387, NM_007069, NM_025246, NM_006365, NM_016269, NM_015553, NM_133265, NM_025080, NM_003706, NM_001512, NM_031412, NM_005607, NM_001295, NM_002247, NM_018013, NM_000093, NM_130843, NM_001482, NM_015213, NM_003896, NM_006209, NM_003032, NM_003311, NM_…	1.39715	0.600342
	GNF_U133A_QUARTILE	Parietal Lobe_3rd	0.00138578	NM_004097, NM_002116, NM_080591, NM_006435, NM_181671, NM_004075, NM_145344, NM_018660, NM_033512, NM_006825, NM_001387, NM_012445, NM_018349, NM_001197, NM_018168, NM_006291, NM_006398, NM_002247, NM_172234, NM_130843, NM_033135, NM_173173, NM_018265, NM_013436, NM_152918, NM_022834, NM_017688, NM_000618, NM_017773, NM_002923, NM_002245, NM_014883, NM_000877, NM_019624, NM_018004, NM_003327, NM_…	1.32491	1.45616
	GNF_U133A_QUARTILE	Adrenal Cortex_3rd	0.00159779	NM_004097, NM_006868, NM_006435, NM_080591, NM_053001, NM_018295, NM_004385, NM_000104, NM_004468, NM_017572, NM_016155, NM_145344, NM_001748, NM_012121, NM_003271, NM_000351, NM_005037, NM_139030, NM_000376, NM_004799, NM_006825, NM_015087, NM_178145, NM_016303, NM_007069, NM_012445, NM_001992, NM_144710, NM_002863, NM_005928, NM_004441, NM_014241, NM_000093, NM_001955, NM_002510, NM_003032, NM_…	1.38947	1.67724
	GNF_U133A_QUARTILE	Trachea_3rd	0.00319823	NM_002068, NM_001548, NM_021983, NM_000576, NM_002116, NM_020481, NM_002120, NM_005797, NM_006255, NM_145344, NM_003175, NM_016619, NM_003429, NM_147130, NM_016816, NM_139211, NM_000376, NM_004799, NM_012447, NM_013230, NM_001197, NM_016269, NM_033274, NM_006291, NM_004441, NM_000655, NM_001295, NM_006398, NM_000093, NM_130791, NM_018384, NM_000321, NM_002510, NM_006209, NM_003032, NM_005292, NM_…	1.35486	3.33168
	GNF_U133A_QUARTILE	Cerebellum Peduncles_3rd	0.00418937	NM_017786, NM_020481, NM_017640, NM_003885, NM_030792, NM_012121, NM_001748, NM_023926, NM_015271, NM_153047, NM_003812, NM_015087, NM_004137, NM_025246, NM_006365, NM_033274, NM_003706, NM_031412, NM_004441, NM_001512, NM_000170, NM_018013, NM_172234, NM_130843, NM_130791, NM_173173, NM_022055, NM_001975, NM_017688, NM_016083, NM_021076, NM_022549, NM_002245, NM_014859, NM_004454, NM_145731, NM_…	1.46389	4.34359
	GNF_U133A_QUARTILE	adrenal gland_3rd	0.00675386	NM_024111, NM_173177, NM_020481, NM_181671, NM_012121, NM_024667, NM_023926, NM_139351, NM_000351, NM_153047, NM_004799, NM_003812, NM_033512, NM_178145, NM_001387, NM_015553, NM_025080, NM_003706, NM_001512, NM_002247, NM_005607, NM_018013, NM_172234, NM_130843, NM_003896, NM_173173, NM_000274, NM_022893, NM_013436, NM_000775, NM_022834, NM_001975, NM_016083, NM_018110, NM_021076, NM_004789, NM_…	1.26257	6.91744
	GNF_U133A_QUARTILE	Appendix_3rd	0.00800691	NM_024111, NM_001548, NM_173177, NM_004385, NM_012121, NM_023926, NM_139351, NM_000351, NM_153047, NM_004799, NM_003812, NM_033512, NM_178145, NM_001387, NM_018349, NM_001197, NM_015553, NM_025080, NM_003706, NM_001512, NM_005607, NM_018013, NM_172234, NM_130843, NM_003896, NM_173173, NM_000274, NM_022893, NM_013436, NM_000775, NM_001975, NM_016083, NM_021076, NM_004789, NM_013279, NM_018083, NM_…	1.23143	8.15212
	GOTERM_BP_ALL	GO:0009653~anatomical structure morphogenesis	5.45501e-05	NM_053001, NM_000576, NM_020481, NM_005515, NM_005797, NM_003885, NM_012121, NM_020859, NM_153047, NM_018842, NM_005037, NM_000376, NM_012445, NM_013230, NM_001992, NM_016269, NM_133265, NM_173558, NM_006291, NM_172234, NM_001955, NM_000321, NM_003311, NM_001448, NM_145804, NM_000618, NM_001785, NM_022549, NM_004093, NM_003745, NM_004454, NM_001449, NM_005964, NM_001321, NM_002448, NM_002984, NM_…	1.81255	0.103932
	GOTERM_BP_ALL	GO:0007165~signal transduction	6.06311e-05	NM_145244, NM_173515, NM_021201, NM_020481, NM_181671, NM_006255, NM_017572, NM_012121, NM_153047, NM_004799, NM_003812, NM_178145, NM_139160, NM_032550, NM_001387, NM_021205, NM_018349, NM_001197, NM_001992, NM_003706, NM_014241, NM_005607, NM_001955, NM_002966, NM_173173, NM_152918, NM_175738, NM_016083, NM_018110, NM_000618, NM_002923, NM_017773, NM_001785, NM_032551, NM_001781, NM_004810, NM_…	1.40639	0.115512
	GOTERM_BP_ALL	GO:0042330~taxis	9.39962e-05	NM_148672, NM_181555, NM_000576, NM_001295, NM_016326, NM_002995, NM_004367, NM_006209, NM_003175, NM_000584, NM_003467, NM_002984, NM_002662,	3.99629	0.179023
	GOTERM_BP_ALL	GO:0006935~chemotaxis	9.39962e-05	NM_148672, NM_181555, NM_000576, NM_001295, NM_016326, NM_002995, NM_004367, NM_006209, NM_003175, NM_000584, NM_003467, NM_002984, NM_002662,	3.99629	0.179023
	GOTERM_BP_ALL	GO:0006955~immune response	0.000103427	NM_148672, NM_021983, NM_001548, NM_002116, NM_006435, NM_000576, NM_016584, NM_017773, NM_002120, NM_005515, NM_003175, NM_000877, NM_052941, NM_153047, NM_147130, NM_016816, NM_002984, NM_003327, NM_173065, NM_013230, NM_012445, NM_001295, NM_003810, NM_004367, NM_002995, NM_003032, NM_000584, NM_005816, NM_003467, NM_001877, NM_130386,	2.15484	0.196968
	GOTERM_BP_ALL	GO:0007154~cell communication	0.000125127	NM_145244, NM_173515, NM_021201, NM_020481, NM_181671, NM_006255, NM_017572, NM_012121, NM_153047, NM_004799, NM_178145, NM_139160, NM_003812, NM_032550, NM_001387, NM_021205, NM_018349, NM_001197, NM_001992, NM_003706, NM_002247, NM_014241, NM_005607, NM_171829, NM_001955, NM_002966, NM_173173, NM_152918, NM_175738, NM_016083, NM_018110, NM_000618, NM_002923, NM_017773, NM_001785, NM_032551, NM_…	1.35788	0.238248
	GOTERM_BP_ALL	GO:0042221~response to chemical stimulus	0.000173428	NM_152999, NM_148672, NM_181555, NM_080591, NM_000576, NM_000104, NM_020682, NM_016326, NM_003175, NM_006096, NM_053039, NM_005037, NM_002984, NM_006472, NM_000399, NM_013230, NM_016818, NM_015553, NM_001295, NM_171829, NM_000499, NM_004367, NM_002995, NM_006209, NM_000584, NM_198440, NM_003467, NM_053056, NM_002662, NM_130386,	2.12679	0.330071
	GOTERM_BP_ALL	GO:0002376~immune system process	0.0005363	NM_148672, NM_001548, NM_021983, NM_006435, NM_002116, NM_000576, NM_016584, NM_017773, NM_002120, NM_005515, NM_016326, NM_003175, NM_000877, NM_052941, NM_153047, NM_147130, NM_016816, NM_002984, NM_003327, NM_173065, NM_013230, NM_012445, NM_001295, NM_003810, NM_004367, NM_002995, NM_000321, NM_003032, NM_000584, NM_005816, NM_022893, NM_014707, NM_003467, NM_001877, NM_130386, NM_005574,	1.83915	1.01736
	GOTERM_BP_ALL	GO:0022610~biological adhesion	0.000604182	NM_007115, NM_001974, NM_004385, NM_005797, NM_022549, NM_004063, NM_003885, NM_000358, NM_139030, NM_002984, NM_003812, NM_013230, NM_012445, NM_005560, NM_002338, NM_005928, NM_000655, NM_001295, NM_003978, NM_000346, NM_000093, NM_002213, NM_002510, NM_020351, NM_000584, NM_152890, NM_005816, NM_022334, NM_001102, NM_022834, NM_006533, NM_138961,	1.9178	1.14543
	GOTERM_BP_ALL	GO:0007155~cell adhesion	0.000604182	NM_007115, NM_001974, NM_004385, NM_005797, NM_022549, NM_004063, NM_003885, NM_000358, NM_139030, NM_002984, NM_003812, NM_013230, NM_012445, NM_005560, NM_002338, NM_005928, NM_000655, NM_001295, NM_003978, NM_000346, NM_000093, NM_002213, NM_002510, NM_020351, NM_000584, NM_152890, NM_005816, NM_022334, NM_001102, NM_022834, NM_006533, NM_138961,	1.9178	1.14543
	GOTERM_BP_ALL	GO:0051674~localization of cell	0.000794405	NM_013230, NM_012445, NM_005560, NM_001992, NM_000576, NM_133265, NM_000618, NM_000655, NM_022549, NM_032551, NM_016326, NM_004367, NM_003885, NM_021102, NM_006209, NM_000584, NM_024019, NM_153047, NM_022334, NM_001102, NM_003467, NM_002984,	2.24786	1.50348
	GOTERM_BP_ALL	GO:0006928~cell motility	0.000794405	NM_013230, NM_012445, NM_005560, NM_001992, NM_000576, NM_133265, NM_000618, NM_000655, NM_022549, NM_032551, NM_016326, NM_004367, NM_003885, NM_021102, NM_006209, NM_000584, NM_024019, NM_153047, NM_022334, NM_001102, NM_003467, NM_002984,	2.24786	1.50348
	GOTERM_BP_ALL	GO:0048856~anatomical structure development	0.00091382	NM_004097, NM_000576, NM_053001, NM_016584, NM_020481, NM_005515, NM_005797, NM_004468, NM_003885, NM_020859, NM_012121, NM_000351, NM_018842, NM_153047, NM_005037, NM_000376, NM_003812, NM_001387, NM_013230, NM_012445, NM_001992, NM_016269, NM_133265, NM_033274, NM_002338, NM_173558, NM_006291, NM_004441, NM_172234, NM_001955, NM_000321, NM_003311, NM_173173, NM_022893, NM_013436, NM_000422, NM_…	1.43178	1.72762
	GOTERM_BP_ALL	GO:0007204~elevation of cytosolic calcium ion concentration	0.000993342	NM_002068, NM_013230, NM_148672, NM_000576, NM_001295, NM_003467, NM_001955, NM_004367,	5.00479	1.87662
	GOTERM_BP_ALL	GO:0051480~cytosolic calcium ion homeostasis	0.000993342	NM_002068, NM_013230, NM_148672, NM_000576, NM_001295, NM_003467, NM_001955, NM_004367,	5.00479	1.87662
	GOTERM_BP_ALL	GO:0000902~cell morphogenesis	0.00125725	NM_012445, NM_004999, NM_145804, NM_003722, NM_173558, NM_020481, NM_001785, NM_022549, NM_172234, NM_003745, NM_003885, NM_001449, NM_000321, NM_020859, NM_012121, NM_005964, NM_024019, NM_014624, NM_153047, NM_018842, NM_001321, NM_003467, NM_002984, NM_005256,	2.07723	2.36954
	GOTERM_BP_ALL	GO:0032989~cellular structure morphogenesis	0.00125725	NM_012445, NM_004999, NM_145804, NM_003722, NM_173558, NM_020481, NM_001785, NM_022549, NM_172234, NM_003745, NM_003885, NM_001449, NM_000321, NM_020859, NM_012121, NM_005964, NM_024019, NM_014624, NM_153047, NM_018842, NM_001321, NM_003467, NM_002984, NM_005256,	2.07723	2.36954
	GOTERM_BP_ALL	GO:0009887~organ morphogenesis	0.00140034	NM_005560, NM_012258, NM_000576, NM_053001, NM_016269, NM_133265, NM_003722, NM_000618, NM_006291, NM_001955, NM_004093, NM_001449, NM_004454, NM_020351, NM_002729, NM_003311, NM_000584, NM_001321, NM_003467, NM_005842, NM_000376, NM_002448,	2.14932	2.63584
	GOTERM_BP_ALL	GO:0007626~locomotory behavior	0.00158779	NM_148672, NM_181555, NM_000576, NM_001295, NM_016326, NM_002995, NM_004367, NM_006209, NM_003175, NM_000584, NM_003467, NM_002984, NM_002662,	2.93398	2.98364
	GOTERM_BP_ALL	GO:0055074~calcium ion homeostasis	0.0023303	NM_002068, NM_013230, NM_148672, NM_000576, NM_001295, NM_003467, NM_000376, NM_001955, NM_004367, NM_002995,	3.46205	4.34976
	GOTERM_BP_ALL	GO:0006874~cellular calcium ion homeostasis	0.0023303	NM_002068, NM_013230, NM_148672, NM_000576, NM_001295, NM_003467, NM_000376, NM_001955, NM_004367, NM_002995,	3.46205	4.34976
	GOTERM_BP_ALL	GO:0007166~cell surface receptor linked signal transduction	0.0028139	NM_002068, NM_000576, NM_001974, NM_003885, NM_017572, NM_153047, NM_138445, NM_004799, NM_003812, NM_032550, NM_013230, NM_001992, NM_016269, NM_004441, NM_001295, NM_005607, NM_001955, NM_006209, NM_005292, NM_152918, NM_025216, NM_001505, NM_005855, NM_018110, NM_016083, NM_025212, NM_000618, NM_017773, NM_002923, NM_001785, NM_032551, NM_001781, NM_003745, NM_000877, NM_006018, NM_000845, NM_…	1.50548	5.2297
	GOTERM_BP_ALL	GO:0032502~developmental process	0.00285038	NM_004097, NM_080591, NM_020481, NM_004385, NM_005797, NM_004468, NM_012121, NM_020859, NM_139351, NM_000351, NM_006096, NM_080745, NM_153047, NM_003812, NM_001387, NM_012445, NM_001197, NM_001992, NM_033274, NM_006291, NM_014241, NM_172234, NM_001955, NM_003032, NM_003311, NM_173173, NM_022893, NM_013436, NM_000422, NM_001448, NM_018110, NM_021076, NM_004789, NM_145804, NM_000618, NM_001785, NM_…	1.29013	5.29577
	GOTERM_BP_ALL	GO:0009605~response to external stimulus	0.00292702	NM_148672, NM_181555, NM_000576, NM_007115, NM_016584, NM_016326, NM_020859, NM_001061, NM_000877, NM_003175, NM_147130, NM_005037, NM_002984, NM_032550, NM_000399, NM_001992, NM_003706, NM_001295, NM_000283, NM_004367, NM_002995, NM_001630, NM_006209, NM_000584, NM_014707, NM_003467, NM_001877, NM_002662,	1.82533	5.43442
	GOTERM_BP_ALL	GO:0050896~response to stimulus	0.00309363	NM_152999, NM_021058, NM_001548, NM_021983, NM_181555, NM_006435, NM_080591, NM_002116, NM_000576, NM_016584, NM_002120, NM_005515, NM_020682, NM_000104, NM_004075, NM_020859, NM_003175, NM_006096, NM_052941, NM_053039, NM_153047, NM_147130, NM_005037, NM_016816, NM_032550, NM_013230, NM_012445, NM_001992, NM_015553, NM_003706, NM_001512, NM_001295, NM_171829, NM_000283, NM_000499, NM_172234, NM_…	1.36117	5.73518
	GOTERM_BP_ALL	GO:0022604~regulation of cell morphogenesis	0.00345671	NM_012121, NM_020859, NM_005964, NM_153047, NM_173558, NM_005256,	5.78257	6.38746
	GOTERM_BP_ALL	GO:0022603~regulation of anatomical structure morphogenesis	0.00345671	NM_012121, NM_020859, NM_005964, NM_153047, NM_173558, NM_005256,	5.78257	6.38746
	GOTERM_BP_ALL	GO:0008360~regulation of cell shape	0.00345671	NM_012121, NM_020859, NM_005964, NM_153047, NM_173558, NM_005256,	5.78257	6.38746
	GOTERM_BP_ALL	GO:0055065~metal ion homeostasis	0.00386631	NM_002068, NM_013230, NM_148672, NM_000576, NM_001295, NM_003467, NM_000376, NM_001955, NM_004367, NM_002995,	3.21254	7.11819
	GOTERM_BP_ALL	GO:0006875~cellular metal ion homeostasis	0.00386631	NM_002068, NM_013230, NM_148672, NM_000576, NM_001295, NM_003467, NM_000376, NM_001955, NM_004367, NM_002995,	3.21254	7.11819
	GOTERM_BP_ALL	GO:0007610~behavior	0.00455334	NM_148672, NM_181555, NM_016083, NM_000576, NM_001295, NM_032551, NM_016326, NM_002995, NM_004367, NM_003175, NM_006209, NM_000584, NM_153047, NM_003467, NM_002984, NM_002662, NM_000399,	2.20438	8.33174
	GOTERM_CC_ALL	GO:0016020~membrane	4.84039e-05	NM_173515, NM_181555, NM_006435, NM_080591, NM_002116, NM_021201, NM_018295, NM_020481, NM_002120, NM_005797, NM_005265, NM_003982, NM_004063, NM_001748, NM_024667, NM_020859, NM_012121, NM_052913, NM_003271, NM_000351, NM_006096, NM_153047, NM_053039, NM_147130, NM_018027, NM_173540, NM_006825, NM_003812, NM_021205, NM_001075, NM_018349, NM_001992, NM_001197, NM_033274, NM_003706, NM_005928, NM_…	1.24544	0.0748656
	GOTERM_CC_ALL	GO:0031226~intrinsic to plasma membrane	0.00022598	NM_021983, NM_002116, NM_001974, NM_003982, NM_004063, NM_016155, NM_003271, NM_002844, NM_147130, NM_139030, NM_003812, NM_004137, NM_013230, NM_001992, NM_006598, NM_000655, NM_004441, NM_002247, NM_001295, NM_171829, NM_172234, NM_130843, NM_002510, NM_003896, NM_006209, NM_001505, NM_005855, NM_001448, NM_003740, NM_016083, NM_002245, NM_004093, NM_001781, NM_000877, NM_021603, NM_145731, NM_…	1.68984	0.349072
	GOTERM_CC_ALL	GO:0044459~plasma membrane part	0.000235755	NM_002068, NM_021983, NM_002116, NM_001974, NM_020481, NM_002120, NM_003982, NM_004063, NM_016155, NM_020859, NM_003271, NM_002844, NM_147130, NM_139030, NM_003812, NM_004137, NM_013230, NM_001992, NM_006598, NM_133265, NM_005928, NM_000655, NM_004441, NM_005607, NM_002247, NM_001295, NM_171829, NM_172234, NM_130843, NM_002510, NM_003896, NM_006209, NM_001505, NM_005855, NM_001448, NM_016083, NM_…	1.54596	0.364145
	GOTERM_CC_ALL	GO:0005887~integral to plasma membrane	0.000301312	NM_021983, NM_002116, NM_001974, NM_003982, NM_004063, NM_016155, NM_003271, NM_002844, NM_147130, NM_139030, NM_003812, NM_004137, NM_001992, NM_006598, NM_000655, NM_004441, NM_002247, NM_001295, NM_171829, NM_172234, NM_130843, NM_002510, NM_003896, NM_006209, NM_001505, NM_005855, NM_001448, NM_003740, NM_016083, NM_002245, NM_004093, NM_001781, NM_000877, NM_021603, NM_145731, NM_006018, NM_…	1.68009	0.465183
	GOTERM_CC_ALL	GO:0005886~plasma membrane	0.000749046	NM_002068, NM_152999, NM_021983, NM_006868, NM_002116, NM_001974, NM_020481, NM_002120, NM_003982, NM_194298, NM_004063, NM_016155, NM_001748, NM_020859, NM_003271, NM_000351, NM_006096, NM_002844, NM_153047, NM_147130, NM_139030, NM_138445, NM_003812, NM_004137, NM_013230, NM_001992, NM_006598, NM_133265, NM_002338, NM_005928, NM_004441, NM_031412, NM_000655, NM_005607, NM_001295, NM_002247, NM_…	1.37792	1.15268
	GOTERM_CC_ALL	GO:0030173~integral to Golgi membrane	0.00539842	NM_003896, NM_152999, NM_003032, NM_017436, NM_006100, NM_018641,	5.22712	8.03407
	GOTERM_MF_ALL	GO:0005178~integrin binding	0.00121938	NM_002510, NM_005560, NM_000358, NM_005928, NM_001102, NM_003812, NM_002213,	5.7464	2.15322
	GOTERM_MF_ALL	GO:0005102~receptor binding	0.00196118	NM_148672, NM_181555, NM_018110, NM_000576, NM_000618, NM_016584, NM_002120, NM_004093, NM_016326, NM_003745, NM_003175, NM_000358, NM_144720, NM_002984, NM_003812, NM_005560, NM_000690, NM_001992, NM_005928, NM_031412, NM_003810, NM_004795, NM_001955, NM_002213, NM_002995, NM_000321, NM_002510, NM_033135, NM_002966, NM_000584, NM_014624, NM_001102, NM_006533,	1.76675	3.44161
	GOTERM_MF_ALL	GO:0008092~cytoskeletal protein binding	0.00312302	NM_015888, NM_052905, NM_004999, NM_020481, NM_031412, NM_002997, NM_020770, NM_022549, NM_003978, NM_004468, NM_003633, NM_024875, NM_020859, NM_005964, NM_015271, NM_153047, NM_024734, NM_018027, NM_001102, NM_003467, NM_002628,	2.06281	5.42742
	GOTERM_MF_ALL	GO:0008009~chemokine activity	0.00400306	NM_148672, NM_003175, NM_000584, NM_002984, NM_016326, NM_002995,	5.59109	6.90586
	GOTERM_MF_ALL	GO:0042379~chemokine receptor binding	0.00400306	NM_148672, NM_003175, NM_000584, NM_002984, NM_016326, NM_002995,	5.59109	6.90586
	GOTERM_MF_ALL	GO:0019955~cytokine binding	0.00468065	NM_000877, NM_001559, NM_001295, NM_003467, NM_003327, NM_172234, NM_173065, NM_004367,	3.83093	8.02928
	HIV_INTERACTION	env:Envelope surface glycoprotein gp120	0.00237675	NM_021983, NM_080591, NM_002116, NM_000576, NM_000618, NM_002120, NM_001781, NM_006255, NM_001748, NM_153047, NM_139030, NM_002984, NM_000376, NM_005560, NM_003706, NM_000655, NM_002997, NM_002649, NM_002247, NM_001295, NM_024420, NM_003810, NM_171829, NM_001955, NM_004367, NM_002995, NM_000321, NM_000584, NM_013436, NM_003467, NM_001877,	1.54555	1.76755
	HIV_INTERACTION_CATEGORY	tat:Tat upregulates	0.00182304	NM_005560, NM_021983, NM_002116, NM_000576, NM_000618, NM_005607, NM_003810, NM_001955, NM_001781, NM_002995, NM_000877, NM_000584, NM_003467, NM_002984, NM_053056,	2.39209	2.42309
	KEGG_PATHWAY	hsa04060:Cytokine-cytokine receptor interaction	0.00161341	NM_148672, NM_001559, NM_000576, NM_016584, NM_001295, NM_003810, NM_172234, NM_002995, NM_004367, NM_003175, NM_000877, NM_000584, NM_003467, NM_002984, NM_003327, NM_173065, NM_001560,	2.3771	2.00515
	PFAM	PF04548:AIG1	0.000426308	NM_153236, NM_024711, NM_175571, NM_018384,	23.4076	0.77603

## Sheet: The least variable genes
Category	Term	PValue	Genes	Fold Enrichment	FDR
GNF_U133A_QUARTILE	Cerebellum_3rd	1.57881e-06	NM_003460, NM_018058, NM_002360, NM_003985, NM_001402, NM_000639, NM_021815, NM_002852, NM_005959, NM_005276, NM_002761, NM_147164, NM_014511, NM_006604, NM_006737, NM_014441, NM_031887, NM_018382, NM_198139, NM_000982, NM_014070, NM_014919, NM_005599, NM_006485, NM_001171, NM_194358, NM_003643, NM_199418, NM_001917, NM_000678, NM_000453, NM_002240, NM_015879, NM_153818, NM_001076, NM_001854, NM_…	1.18018	0.00167002
GNF_U133A_QUARTILE	salivarygland_3rd	0.000390167	NM_003460, NM_018058, NM_002360, NM_003985, NM_001402, NM_000639, NM_021815, NM_005959, NM_005276, NM_002761, NM_147164, NM_014511, NM_006604, NM_006737, NM_014441, NM_031887, NM_018382, NM_198139, NM_000982, NM_014070, NM_014919, NM_006485, NM_005599, NM_001171, NM_194358, NM_003643, NM_001917, NM_001030, NM_000678, NM_000453, NM_002240, NM_015879, NM_153818, NM_001025, NM_001076, NM_001854, NM_…	1.12205	0.411941
GNF_U133A_QUARTILE	lymphomaburkittsRaji_3rd	0.000479069	NM_003460, NM_018058, NM_002360, NM_003985, NM_001402, NM_000639, NM_021815, NM_005959, NM_005276, NM_002761, NM_147164, NM_014511, NM_006604, NM_006737, NM_014441, NM_031887, NM_018382, NM_198139, NM_000982, NM_014070, NM_014919, NM_006485, NM_005599, NM_001171, NM_194358, NM_003643, NM_001917, NM_001030, NM_000678, NM_000453, NM_015879, NM_153818, NM_001025, NM_001076, NM_001854, NM_005235, NM_…	1.13679	0.505589
GNF_U133A_QUARTILE	BM-CD105+Endothelial_3rd	0.000684048	NM_024636, NM_024689, NM_003305, NM_024702, NM_001402, NM_000260, NM_006863, NM_007252, NM_080740, NM_002852, NM_002930, NM_020482, NM_145872, NM_023914, NM_177952, NM_015667, NM_004606, NM_002530, NM_006604, NM_006212, NM_152749, NM_006737, NM_031887, NM_002944, NM_176895, NM_178153, NM_001006, NM_181351, NM_018382, NM_017716, NM_198139, NM_000982, NM_005295, NM_024012, NM_000363, NM_002411, NM_…	1.34452	0.721207
GNF_U133A_QUARTILE	TONGUE_3rd	0.00111214	NM_024636, NM_024689, NM_003305, NM_003985, NM_024702, NM_001402, NM_033637, NM_199186, NM_003393, NM_021815, NM_007252, NM_080740, NM_002852, NM_002930, NM_020482, NM_145872, NM_015667, NM_004606, NM_002530, NM_006604, NM_006212, NM_152749, NM_001006, NM_018382, NM_030959, NM_000982, NM_005295, NM_002411, NM_004878, NM_006485, NM_005599, NM_001171, NM_001817, NM_145895, NM_006424, NM_006771, NM_…	1.36429	1.17015
GNF_U133A_QUARTILE	Smooth Muscle_3rd	0.00144238	NM_003460, NM_005672, NM_002360, NM_024636, NM_003305, NM_003985, NM_024702, NM_001402, NM_007209, NM_000307, NM_000260, NM_003393, NM_006863, NM_007252, NM_138564, NM_080740, NM_002852, NM_005276, NM_020482, NM_145872, NM_015667, NM_004606, NM_002530, NM_014511, NM_006604, NM_172113, NM_006212, NM_152749, NM_022580, NM_006737, NM_001794, NM_031887, NM_014279, NM_002944, NM_018382, NM_005295, NM_…	1.31615	1.51522
GNF_U133A_QUARTILE	PB-BDCA4+Dentritic_Cells_3rd	0.00173625	NM_000661, NM_000993, NM_024689, NM_020689, NM_006691, NM_001030, NM_000998, NM_004105, NM_001006, NM_002438, NM_000982, NM_020742, NM_005100, NM_000372, NM_004101, NM_002725, NM_006485, NM_001927, NM_020482, NM_000073, NM_007374,	2.15896	1.82137
GNF_U133A_QUARTILE	fetalThyroid_3rd	0.00228018	NM_001917, NM_001402, NM_020353, NM_006174, NM_000533, NM_001076, NM_003393, NM_020742, NM_004590, NM_014898, NM_139314, NM_001927, NM_004950, NM_002530, NM_014511, NM_014279, NM_176895, NM_000410, NM_153840, NM_018382, NM_021973, NM_145351, NM_030944, NM_018417, NM_021080, NM_002725, NM_006485, NM_001475, NM_002021,	1.82831	2.38576
GNF_U133A_QUARTILE	Testis_3rd	0.00355325	NM_024689, NM_003305, NM_006950, NM_017556, NM_015285, NM_001402, NM_033637, NM_003683, NM_007209, NM_000260, NM_003393, NM_004098, NM_002930, NM_002761, NM_002530, NM_152749, NM_001794, NM_014279, NM_005226, NM_178153, NM_181351, NM_002666, NM_018382, NM_002924, NM_005295, NM_020659, NM_018444, NM_006688, NM_006485, NM_015039, NM_194358, NM_003643, NM_001917, NM_016179, NM_198850, NM_153186, NM_…	1.35285	3.69525
GNF_U133A_QUARTILE	Pons_3rd	0.00804131	NM_024636, NM_018058, NM_003305, NM_003985, NM_006950, NM_001402, NM_002873, NM_133343, NM_000639, NM_000260, NM_007252, NM_005422, NM_005959, NM_005276, NM_002530, NM_014511, NM_172113, NM_006604, NM_006737, NM_014279, NM_031887, NM_014441, NM_001006, NM_017716, NM_018382, NM_000982, NM_014070, NM_024012, NM_002411, NM_005599, NM_006485, NM_001171, NM_018843, NM_003643, NM_003049, NM_005987, NM_…	1.18825	8.1858
GOTERM_BP_ALL	GO:0050877~neurological system process	4.7328e-05	NM_003305, NM_006950, NM_000678, NM_006269, NM_000307, NM_006174, NM_000533, NM_000260, NM_001854, NM_173536, NM_199425, NM_021815, NM_005422, NM_007252, NM_005959, NM_153381, NM_052995, NM_002930, NM_006056, NM_007374, NM_005285, NM_031887, NM_004105, NM_198074, NM_181351, NM_001163, NM_001101, NM_001614, NM_030959, NM_000372, NM_013939, NM_152443, NM_000363, NM_012428, NM_001171, NM_001525, NM_…	2.00951	0.090178
GOTERM_BP_ALL	GO:0007218~neuropeptide signaling pathway	6.05554e-05	NM_022150, NM_020455, NM_153835, NM_001525, NM_006056, NM_006174, NM_033106, NM_153840, NM_005297, NM_005285, NM_001526,	5.01604	0.115367
GOTERM_BP_ALL	GO:0003008~system process	0.000183847	NM_003305, NM_006950, NM_000678, NM_006269, NM_000307, NM_006174, NM_000533, NM_000260, NM_001854, NM_173536, NM_199425, NM_021815, NM_005422, NM_007252, NM_001170, NM_005959, NM_153381, NM_052995, NM_002930, NM_006056, NM_001927, NM_007374, NM_005285, NM_012283, NM_000420, NM_031887, NM_007102, NM_004105, NM_198074, NM_001163, NM_181351, NM_001101, NM_001614, NM_000020, NM_030959, NM_000372, NM_…	1.76456	0.349868
GOTERM_BP_ALL	GO:0007166~cell surface receptor linked signal transduction	0.000566453	NM_033637, NM_153835, NM_003393, NM_005297, NM_006863, NM_022150, NM_173536, NM_005959, NM_153442, NM_033106, NM_021249, NM_005285, NM_023914, NM_033119, NM_002530, NM_014441, NM_002944, NM_145203, NM_005226, NM_176895, NM_198074, NM_000020, NM_030959, NM_002924, NM_005269, NM_005295, NM_024012, NM_001525, NM_001508, NM_000678, NM_020455, NM_021722, NM_006174, NM_014215, NM_053049, NM_005235, NM_…	1.60054	1.07427
GOTERM_BP_ALL	GO:0032501~multicellular organismal process	0.000684882	NM_002360, NM_003305, NM_006950, NM_000260, NM_173536, NM_007252, NM_005422, NM_021815, NM_005959, NM_004098, NM_178822, NM_002761, NM_005285, NM_147164, NM_002530, NM_172113, NM_014279, NM_031887, NM_198074, NM_181351, NM_198139, NM_030959, NM_152443, NM_032575, NM_005599, NM_001171, NM_003643, NM_004118, NM_005987, NM_153827, NM_006269, NM_000678, NM_000533, NM_001854, NM_005235, NM_001170, NM_…	1.32863	1.29748
GOTERM_BP_ALL	GO:0007186~G-protein coupled receptor protein signaling pathway	0.00126938	NM_020455, NM_000678, NM_153835, NM_006174, NM_053049, NM_005297, NM_022150, NM_173536, NM_005100, NM_005959, NM_006056, NM_033106, NM_153442, NM_005285, NM_023914, NM_005226, NM_176895, NM_198074, NM_004885, NM_153840, NM_030959, NM_002924, NM_005295, NM_013939, NM_024012, NM_004101, NM_001525, NM_007197, NM_001508, NM_012152, NM_001526,	1.85696	2.39216
GOTERM_BP_ALL	GO:0006412~translation	0.00131587	NM_000661, NM_000993, NM_001917, NM_001000, NM_001030, NM_016179, NM_000998, NM_001402, NM_174936, NM_021104, NM_007209, NM_001006, NM_001025, NM_000986, NM_000982, NM_002952, NM_005617, NM_000980, NM_001024, NM_024986, NM_001026, NM_000981, NM_000994, NM_025220,	2.0698	2.47873
GOTERM_CC_ALL	GO:0005830~cytosolic ribosome (sensu Eukaryota)	7.40951e-09	NM_000993, NM_001000, NM_001030, NM_021104, NM_007209, NM_001006, NM_001025, NM_000986, NM_000982, NM_002952, NM_005617, NM_000980, NM_001024, NM_001026, NM_000981,	7.57098	1.14642e-05
GOTERM_CC_ALL	GO:0005840~ribosome	5.63903e-07	NM_000661, NM_000993, NM_001000, NM_001030, NM_016179, NM_000998, NM_021104, NM_007209, NM_001006, NM_001025, NM_000986, NM_000982, NM_002952, NM_005617, NM_000980, NM_001024, NM_024986, NM_001026, NM_000981, NM_000994,	4.00494	0.000872482
GOTERM_CC_ALL	GO:0033279~ribosomal subunit	2.30678e-06	NM_000993, NM_001000, NM_001030, NM_021104, NM_007209, NM_001006, NM_001025, NM_000986, NM_000982, NM_002952, NM_005617, NM_000980, NM_001024, NM_001026, NM_000981,	4.84808	0.00356906
GOTERM_CC_ALL	GO:0005886~plasma membrane	2.97128e-06	NM_003460, NM_024636, NM_003305, NM_006950, NM_153835, NM_000639, NM_000260, NM_173536, NM_005422, NM_021815, NM_005959, NM_153442, NM_005285, NM_147164, NM_023914, NM_145752, NM_033119, NM_014511, NM_002530, NM_006737, NM_014441, NM_005226, NM_198074, NM_181351, NM_030959, NM_002924, NM_005295, NM_024012, NM_205545, NM_001171, NM_001508, NM_003049, NM_006424, NM_000678, NM_000453, NM_002240, NM_…	1.54773	0.00459714
GOTERM_CC_ALL	GO:0044445~cytosolic part	9.99372e-06	NM_000993, NM_001000, NM_001030, NM_021104, NM_007209, NM_001006, NM_001025, NM_000986, NM_000982, NM_002952, NM_005617, NM_000980, NM_001024, NM_001026, NM_000981,	4.28435	0.0154614
GOTERM_CC_ALL	GO:0005842~cytosolic large ribosomal subunit (sensu Eukaryota)	6.08848e-05	NM_000993, NM_000982, NM_001000, NM_000980, NM_021104, NM_007209, NM_000981, NM_000986,	7.75693	0.0941612
GOTERM_CC_ALL	GO:0005887~integral to plasma membrane	7.22819e-05	NM_024636, NM_003305, NM_000639, NM_005297, NM_198353, NM_005959, NM_014511, NM_002530, NM_006737, NM_014441, NM_002944, NM_005226, NM_176895, NM_000020, NM_014219, NM_005295, NM_024012, NM_001525, NM_014625, NM_001508, NM_003049, NM_001817, NM_006424, NM_000678, NM_002240, NM_006174, NM_014215, NM_005235, NM_002438, NM_001170, NM_133178, NM_006056, NM_001042, NM_013231, NM_002255, NM_006691, NM_…	1.76775	0.111778
GOTERM_CC_ALL	GO:0031226~intrinsic to plasma membrane	0.000103449	NM_024636, NM_003305, NM_000639, NM_005297, NM_198353, NM_005959, NM_014511, NM_002530, NM_006737, NM_014441, NM_002944, NM_005226, NM_176895, NM_000020, NM_014219, NM_005295, NM_024012, NM_001525, NM_014625, NM_001508, NM_003049, NM_001817, NM_006424, NM_000678, NM_002240, NM_006174, NM_014215, NM_005235, NM_002438, NM_001170, NM_133178, NM_006056, NM_001042, NM_013231, NM_002255, NM_006691, NM_…	1.74315	0.159939
GOTERM_CC_ALL	GO:0016021~integral to membrane	0.000208393	NM_003460, NM_024636, NM_003305, NM_153835, NM_000639, NM_173536, NM_182516, NM_021815, NM_005959, NM_178822, NM_153442, NM_005285, NM_023914, NM_147164, NM_145752, NM_002530, NM_014511, NM_016219, NM_006737, NM_014441, NM_005226, NM_198074, NM_178826, NM_181351, NM_017716, NM_030959, NM_005295, NM_024012, NM_006485, NM_001171, NM_001508, NM_018843, NM_003049, NM_000678, NM_006424, NM_000453, NM_…	1.30182	0.321945
GOTERM_CC_ALL	GO:0031224~intrinsic to membrane	0.00025861	NM_003460, NM_024636, NM_003305, NM_153835, NM_000639, NM_173536, NM_182516, NM_021815, NM_005959, NM_178822, NM_153442, NM_005285, NM_023914, NM_147164, NM_145752, NM_002530, NM_014511, NM_016219, NM_006737, NM_014441, NM_005226, NM_198074, NM_178826, NM_181351, NM_017716, NM_030959, NM_005295, NM_024012, NM_006485, NM_001171, NM_001508, NM_018843, NM_003049, NM_000678, NM_006424, NM_000453, NM_…	1.29592	0.39938
GOTERM_CC_ALL	GO:0005843~cytosolic small ribosomal subunit (sensu Eukaryota)	0.000265244	NM_002952, NM_005617, NM_001030, NM_001024, NM_001026, NM_001006, NM_001025,	7.58582	0.409606
GOTERM_CC_ALL	GO:0015934~large ribosomal subunit	0.00123729	NM_000993, NM_000982, NM_001000, NM_000980, NM_021104, NM_007209, NM_000981, NM_000986,	4.83219	1.89733
GOTERM_CC_ALL	GO:0015935~small ribosomal subunit	0.00355544	NM_002952, NM_005617, NM_001030, NM_001024, NM_001026, NM_001006, NM_001025,	4.68942	5.36177
GOTERM_CC_ALL	GO:0030529~ribonucleoprotein complex	0.00364965	NM_000661, NM_000993, NM_001000, NM_001030, NM_016179, NM_000998, NM_173491, NM_003683, NM_021104, NM_007209, NM_001006, NM_001025, NM_000986, NM_000982, NM_002952, NM_005617, NM_000980, NM_001024, NM_024986, NM_001026, NM_000981, NM_000994,	1.98676	5.50012
GOTERM_MF_ALL	GO:0003735~structural constituent of ribosome	1.19515e-07	NM_000661, NM_000993, NM_001000, NM_001030, NM_016179, NM_000998, NM_021104, NM_007209, NM_001006, NM_001025, NM_000986, NM_000982, NM_002952, NM_005617, NM_000980, NM_001024, NM_024986, NM_001026, NM_000981, NM_000994,	4.42161	0.000213218
GOTERM_MF_ALL	GO:0005198~structural molecule activity	1.11189e-06	NM_005987, NM_000661, NM_000993, NM_152349, NM_001000, NM_016179, NM_001030, NM_006121, NM_006771, NM_031958, NM_007209, NM_000533, NM_001025, NM_001854, NM_002952, NM_005422, NM_001024, NM_000981, NM_000994, NM_001927, NM_014359, NM_000998, NM_021104, NM_001006, NM_001101, NM_001614, NM_000986, NM_198139, NM_173080, NM_000982, NM_005617, NM_000980, NM_002283, NM_024986, NM_001026, NM_002725, NM_…	2.36966	0.00198362
GOTERM_MF_ALL	GO:0004888~transmembrane receptor activity	2.27511e-06	NM_020455, NM_000678, NM_153835, NM_006174, NM_014215, NM_005297, NM_006863, NM_022150, NM_005235, NM_173536, NM_005959, NM_133178, NM_178822, NM_006056, NM_153442, NM_005285, NM_023914, NM_147164, NM_002530, NM_002255, NM_006691, NM_014279, NM_002944, NM_005226, NM_198074, NM_004885, NM_002310, NM_153840, NM_002851, NM_000020, NM_030959, NM_000573, NM_145351, NM_005295, NM_014219, NM_013939, NM_…	2.13645	0.00405878
GOTERM_MF_ALL	GO:0004872~receptor activity	8.53365e-05	NM_003460, NM_003305, NM_001402, NM_153835, NM_005297, NM_006863, NM_022150, NM_173536, NM_005959, NM_015869, NM_178822, NM_153442, NM_005285, NM_147164, NM_023914, NM_014511, NM_002530, NM_006737, NM_014279, NM_002944, NM_005226, NM_198074, NM_017716, NM_000020, NM_030959, NM_005295, NM_014219, NM_024012, NM_001525, NM_001508, NM_016179, NM_000678, NM_020455, NM_006121, NM_006174, NM_014215, NM_…	1.67868	0.152133
GOTERM_MF_ALL	GO:0004871~signal transducer activity	0.000207794	NM_003460, NM_003305, NM_003985, NM_001402, NM_153835, NM_000639, NM_005297, NM_003393, NM_006863, NM_022150, NM_173536, NM_005959, NM_015869, NM_178822, NM_153442, NM_005285, NM_023914, NM_177952, NM_147164, NM_002530, NM_014511, NM_006737, NM_014279, NM_002944, NM_005226, NM_198074, NM_017716, NM_000020, NM_030959, NM_002924, NM_005295, NM_014219, NM_024012, NM_001525, NM_001508, NM_016179, NM_…	1.53937	0.370062
GOTERM_MF_ALL	GO:0060089~molecular transducer activity	0.000207794	NM_003460, NM_003305, NM_003985, NM_001402, NM_153835, NM_000639, NM_005297, NM_003393, NM_006863, NM_022150, NM_173536, NM_005959, NM_015869, NM_178822, NM_153442, NM_005285, NM_023914, NM_177952, NM_147164, NM_002530, NM_014511, NM_006737, NM_014279, NM_002944, NM_005226, NM_198074, NM_017716, NM_000020, NM_030959, NM_002924, NM_005295, NM_014219, NM_024012, NM_001525, NM_001508, NM_016179, NM_…	1.53937	0.370062
GOTERM_MF_ALL	GO:0004930~G-protein coupled receptor activity	0.000719851	NM_020455, NM_000678, NM_153835, NM_006174, NM_005297, NM_022150, NM_005959, NM_006056, NM_153442, NM_005285, NM_023914, NM_005226, NM_198074, NM_004885, NM_153840, NM_030959, NM_005295, NM_013939, NM_024012, NM_004101, NM_001525, NM_007197, NM_012152, NM_001508, NM_001526,	2.12381	1.27648
GOTERM_MF_ALL	GO:0001584~rhodopsin-like receptor activity	0.00343514	NM_023914, NM_000678, NM_005226, NM_198074, NM_006174, NM_004885, NM_005297, NM_030959, NM_005295, NM_005959, NM_013939, NM_004101, NM_024012, NM_006056, NM_001525, NM_001508, NM_012152, NM_153442, NM_005285, NM_001526,	2.09113	5.95429
KEGG_PATHWAY	hsa03010:Ribosome	3.34103e-11	NM_000661, NM_000993, NM_001000, NM_001030, NM_000998, NM_021104, NM_007209, NM_001006, NM_001025, NM_000986, NM_000982, NM_002952, NM_000980, NM_001024, NM_001026, NM_000981, NM_000994,	8.53587	4.19107e-08
PFAM	PF00001:7tm_1	0.000813735	NM_023914, NM_000678, NM_005226, NM_198074, NM_006174, NM_004885, NM_005297, NM_030959, NM_005295, NM_005959, NM_013939, NM_004101, NM_024012, NM_006056, NM_001525, NM_001508, NM_012152, NM_153442, NM_005285, NM_001526,	2.37021	1.47634
PFAM	PF00047:ig	0.00457226	NM_006863, NM_147164, NM_002530, NM_014511, NM_002255, NM_014219, NM_006737, NM_023068, NM_052843, NM_012428, NM_178822, NM_181351,	2.73013	8.03201
PIR_SUPERFAMILY	PIRSF016955:PIRSF016955	0.00170946	NM_014511, NM_002255, NM_014219, NM_006737,	15.4065	3.02324

## Sheet: background gene list
NM_000014
NM_000015
NM_000016
NM_000017
NM_000018
NM_000019
NM_000020
NM_000021
NM_000022
NM_000024
NM_000025
NM_000026
NM_000027
NM_000028
NM_000029
NM_000030
NM_000031
NM_000032
NM_000033
NM_000034
NM_000036
NM_000038
NM_000039
NM_000040
NM_000041
NM_000042
NM_000045
NM_000046
NM_000047
NM_000048
NM_000051
NM_000052
NM_000053
NM_000054
NM_000056
NM_000057
NM_000059
NM_000060
NM_000061
NM_000062
NM_000063
NM_000064
NM_000065
NM_000066
NM_000068
NM_000069
NM_000071
NM_000073
NM_000074
NM_000075
NM_000076
NM_000078
NM_000079
NM_000080
NM_000081
NM_000082
NM_000083
NM_000084
NM_000085
NM_000086
NM_000087
NM_000088
NM_000089
NM_000090
NM_000092
NM_000093
NM_000094
NM_000095
NM_000096
NM_000098
NM_000100
NM_000101
NM_000102
NM_000103
NM_000104
NM_000106
NM_000107
NM_000108
NM_000109
NM_000111
NM_000112
NM_000113
NM_000114
NM_000117
NM_000118
NM_000119
NM_000120
NM_000121
NM_000122
NM_000123
NM_000124
NM_000125
NM_000126
NM_000127
NM_000131
NM_000132
NM_000133
NM_000134
NM_000135
NM_000136
NM_000137
NM_000139
NM_000140
NM_000142
NM_000143
NM_000144
NM_000145
NM_000146
NM_000147
NM_000148
NM_000149
NM_000150
NM_000151
NM_000152
NM_000153
NM_000154
NM_000157
NM_000158
NM_000159
NM_000160
NM_000161
NM_000162
NM_000164
NM_000165
NM_000166
NM_000167
NM_000168
NM_000169
NM_000170
NM_000171
NM_000172
NM_000173
NM_000174
NM_000175
NM_000176
NM_000177
NM_000178
NM_000179
NM_000180
NM_000181
NM_000182
NM_000183
NM_000186
NM_000187
NM_000189
NM_000190
NM_000191
NM_000193
NM_000194
NM_000196
NM_000197
NM_000198
NM_000199
NM_000200
NM_000201
NM_000202
NM_000203
NM_000204
NM_000206
NM_000207
NM_000208
NM_000209
NM_000210
NM_000211
NM_000213
NM_000215
NM_000217
NM_000218
NM_000219
NM_000223
NM_000224
NM_000226
NM_000228
NM_000229
NM_000230
NM_000231
NM_000232
NM_000233
NM_000234
NM_000235
NM_000236
NM_000237
NM_000239
NM_000240
NM_000242
NM_000243
NM_000245
NM_000246
NM_000247
NM_000249
NM_000250
NM_000251
NM_000252
NM_000254
NM_000255
NM_000256
NM_000257
NM_000258
NM_000259
NM_000260
NM_000261
NM_000262
NM_000263
NM_000264
NM_000265
NM_000266
NM_000267
NM_000269
NM_000270
NM_000271
NM_000272
NM_000273
NM_000274
NM_000275
NM_000277
NM_000280
NM_000281
NM_000282
NM_000283
NM_000284
NM_000285
NM_000286
NM_000287
NM_000288
NM_000289
NM_000290
NM_000291
NM_000292
NM_000293
NM_000294
NM_000296
NM_000297
NM_000298
NM_000299
NM_000300
NM_000302
NM_000304
NM_000305
NM_000306
NM_000307
NM_000308
NM_000309
NM_000310
NM_000312
NM_000313
NM_000314
NM_000315
NM_000316
NM_000317
NM_000318
NM_000319
NM_000320
NM_000321
NM_000322
NM_000324
NM_000325
NM_000326
NM_000327
NM_000329
NM_000330
NM_000331
NM_000332
NM_000333
NM_000334
NM_000335
NM_000336
NM_000337
NM_000338
NM_000339
NM_000341
NM_000342
NM_000343
NM_000345
NM_000346
NM_000347
NM_000348
NM_000349
NM_000350
NM_000351
NM_000352
NM_000353
NM_000354
NM_000355
NM_000356
NM_000358
NM_000359
NM_000361
NM_000362
NM_000363
NM_000364
NM_000365
NM_000366
NM_000367
NM_000368
NM_000369
NM_000370
NM_000371
NM_000372
NM_000373
NM_000374
NM_000375
NM_000376
NM_000377
NM_000378
NM_000380
NM_000383
NM_000384
NM_000386
NM_000387
NM_000388
NM_000389
NM_000390
NM_000391
NM_000392
NM_000393
NM_000394
NM_000395
NM_000396
NM_000398
NM_000399
NM_000400
NM_000401
NM_000402
NM_000403
NM_000404
NM_000405
NM_000406
NM_000407
NM_000408
NM_000409
NM_000410
NM_000411
NM_000412
NM_000413
NM_000414
NM_000415
NM_000416
NM_000417
NM_000418
NM_000419
NM_000420
NM_000421
NM_000422
NM_000423
NM_000424
NM_000426
NM_000427
NM_000428
NM_000429
NM_000430
NM_000431
NM_000432
NM_000433
NM_000434
NM_000435
NM_000436
NM_000437
NM_000438
NM_000439
NM_000440
NM_000441
NM_000444
NM_000445
NM_000446
NM_000448
NM_000449
NM_000450
NM_000453
NM_000454
NM_000455
NM_000456
NM_000459
NM_000460
NM_000461
NM_000463
NM_000465
NM_000466
NM_000474
NM_000475
NM_000476
NM_000477
NM_000479
NM_000480
NM_000481
NM_000482
NM_000483
NM_000485
NM_000486
NM_000487
NM_000488
NM_000490
NM_000491
NM_000492
NM_000493
NM_000494
NM_000496
NM_000497
NM_000498
NM_000499
NM_000500
NM_000501
NM_000502
NM_000503
NM_000504
NM_000506
NM_000507
NM_000508
NM_000510
NM_000511
NM_000512
NM_000513
NM_000514
NM_000518
NM_000520
NM_000521
NM_000522
NM_000523
NM_000524
NM_000525
NM_000526
NM_000527
NM_000528
NM_000529
NM_000530
NM_000531
NM_000532
NM_000533
NM_000534
NM_000535
NM_000536
NM_000537
NM_000538
NM_000539
NM_000540
NM_000541
NM_000542
NM_000543
NM_000544
NM_000545
NM_000546
NM_000548
NM_000549
NM_000550
NM_000551
NM_000552
NM_000553
NM_000554
NM_000555
NM_000557
NM_000560
NM_000562
NM_000565
NM_000566
NM_000567
NM_000569
NM_000570
NM_000572
NM_000573
NM_000574
NM_000576
NM_000578
NM_000579
NM_000582
NM_000583
NM_000584
NM_000585
NM_000586
NM_000587
NM_000588
NM_000590
NM_000591
NM_000592
NM_000593
NM_000594
NM_000595
NM_000596
NM_000599
NM_000600
NM_000601
NM_000602
NM_000603
NM_000605
NM_000606
NM_000607
NM_000608
NM_000609
NM_000610
NM_000611
NM_000613
NM_000614
NM_000615
NM_000616
NM_000617
NM_000618
NM_000620
NM_000621
NM_000623
NM_000624
NM_000625
NM_000626
NM_000628
NM_000629
NM_000633
NM_000634
NM_000636
NM_000637
NM_000638
NM_000639
NM_000640
NM_000641
NM_000642
NM_000644
NM_000645
NM_000646
NM_000655
NM_000657
NM_000659
NM_000660
NM_000661
NM_000662
NM_000663
NM_000664
NM_000665
NM_000666
NM_000667
NM_000668
NM_000669
NM_000670
NM_000671
NM_000672
NM_000673
NM_000674
NM_000675
NM_000676
NM_000677
NM_000678
NM_000679
NM_000680
NM_000681
NM_000682
NM_000683
NM_000684
NM_000686
NM_000687
NM_000688
NM_000689
NM_000690
NM_000692
NM_000694
NM_000695
NM_000696
NM_000697
NM_000698
NM_000699
NM_000701
NM_000702
NM_000704
NM_000705
NM_000706
NM_000707
NM_000709
NM_000710
NM_000712
NM_000713
NM_000714
NM_000715
NM_000717
NM_000718
NM_000719
NM_000720
NM_000721
NM_000722
NM_000723
NM_000725
NM_000726
NM_000727
NM_000728
NM_000730
NM_000733
NM_000734
NM_000735
NM_000737
NM_000738
NM_000739
NM_000740
NM_000741
NM_000742
NM_000743
NM_000744
NM_000745
NM_000746
NM_000747
NM_000748
NM_000749
NM_000750
NM_000751
NM_000754
NM_000756
NM_000758
NM_000761
NM_000762
NM_000765
NM_000766
NM_000767
NM_000769
NM_000770
NM_000771
NM_000772
NM_000773
NM_000774
NM_000775
NM_000777
NM_000778
NM_000779
NM_000780
NM_000781
NM_000782
NM_000784
NM_000785
NM_000786
NM_000787
NM_000788
NM_000789
NM_000790
NM_000791
NM_000792
NM_000793
NM_000794
NM_000795
NM_000797
NM_000799
NM_000800
NM_000801
NM_000803
NM_000804
NM_000805
NM_000806
NM_000807
NM_000808
NM_000809
NM_000810
NM_000811
NM_000812
NM_000813
NM_000814
NM_000815
NM_000816
NM_000817
NM_000818
NM_000819
NM_000820
NM_000821
NM_000823
NM_000824
NM_000825
NM_000826
NM_000827
NM_000829
NM_000831
NM_000832
NM_000833
NM_000834
NM_000835
NM_000836
NM_000838
NM_000839
NM_000841
NM_000842
NM_000843
NM_000845
NM_000846
NM_000847
NM_000848
NM_000849
NM_000851
NM_000852
NM_000853
NM_000854
NM_000855
NM_000858
NM_000859
NM_000861
NM_000862
NM_000863
NM_000864
NM_000865
NM_000866
NM_000868
NM_000870
NM_000871
NM_000872
NM_000873
NM_000874
NM_000875
NM_000876
NM_000877
NM_000878
NM_000879
NM_000882
NM_000883
NM_000884
NM_000885
NM_000888
NM_000889
NM_000890
NM_000892
NM_000893
NM_000894
NM_000895
NM_000896
NM_000897
NM_000899
NM_000900
NM_000901
NM_000902
NM_000903
NM_000907
NM_000908
NM_000909
NM_000910
NM_000911
NM_000912
NM_000914
NM_000915
NM_000916
NM_000917
NM_000918
NM_000920
NM_000922
NM_000923
NM_000924
NM_000925
NM_000926
NM_000927
NM_000928
NM_000929
NM_000931
NM_000932
NM_000934
NM_000936
NM_000937
NM_000938
NM_000941
NM_000942
NM_000943
NM_000944
NM_000945
NM_000946
NM_000947
NM_000949
NM_000950
NM_000953
NM_000954
NM_000955
NM_000958
NM_000959
NM_000960
NM_000961
NM_000962
NM_000963
NM_000964
NM_000966
NM_000967
NM_000968
NM_000969
NM_000970
NM_000971
NM_000972
NM_000973
NM_000975
NM_000976
NM_000977
NM_000978
NM_000979
NM_000980
NM_000981
NM_000982
NM_000983
NM_000984
NM_000985
NM_000986
NM_000987
NM_000988
NM_000989
NM_000990
NM_000992
NM_000993
NM_000994
NM_000995
NM_000996
NM_000997
NM_000998
NM_000999
NM_001000
NM_001001
NM_001002
NM_001003
NM_001004
NM_001005
NM_001006
NM_001007
NM_001009
NM_001010
NM_001011
NM_001012
NM_001013
NM_001014
NM_001015
NM_001016
NM_001017
NM_001018
NM_001019
NM_001020
NM_001021
NM_001022
NM_001023
NM_001024
NM_001025
NM_001026
NM_001028
NM_001029
NM_001030
NM_001031
NM_001032
NM_001033
NM_001035
NM_001036
NM_001037
NM_001038
NM_001039
NM_001040
NM_001041
NM_001042
NM_001043
NM_001044
NM_001047
NM_001048
NM_001049
NM_001050
NM_001052
NM_001053
NM_001055
NM_001057
NM_001058
NM_001059
NM_001060
NM_001061
NM_001062
NM_001063
NM_001064
NM_001066
NM_001067
NM_001068
NM_001070
NM_001071
NM_001072
NM_001075
NM_001076
NM_001078
NM_001079
NM_001080
NM_001081
NM_001082
NM_001084
NM_001085
NM_001086
NM_001087
NM_001088
NM_001089
NM_001090
NM_001093
NM_001095
NM_001096
NM_001097
NM_001098
NM_001100
NM_001101
NM_001102
NM_001103
NM_001104
NM_001106
NM_001109
NM_001110
NM_001111
NM_001114
NM_001115
NM_001116
NM_001117
NM_001118
NM_001119
NM_001122
NM_001123
NM_001125
NM_001126
NM_001128
NM_001129
NM_001130
NM_001131
NM_001132
NM_001133
NM_001134
NM_001135
NM_001136
NM_001138
NM_001139
NM_001140
NM_001144
NM_001145
NM_001146
NM_001147
NM_001148
NM_001150
NM_001151
NM_001152
NM_001153
NM_001154
NM_001156
NM_001157
NM_001158
NM_001159
NM_001161
NM_001163
NM_001164
NM_001165
NM_001166
NM_001167
NM_001168
NM_001170
NM_001171
NM_001172
NM_001173
NM_001174
NM_001175
NM_001176
NM_001177
NM_001178
NM_001179
NM_001183
NM_001184
NM_001185
NM_001186
NM_001187
NM_001188
NM_001189
NM_001190
NM_001191
NM_001192
NM_001194
NM_001195
NM_001197
NM_001198
NM_001201
NM_001202
NM_001203
NM_001204
NM_001207
NM_001208
NM_001211
NM_001212
NM_001213
NM_001214
NM_001215
NM_001216
NM_001217
NM_001218
NM_001219
NM_001220
NM_001222
NM_001224
NM_001225
NM_001226
NM_001228
NM_001229
NM_001231
NM_001232
NM_001234
NM_001235
NM_001237
NM_001238
NM_001239
NM_001240
NM_001241
NM_001243
NM_001244
NM_001245
NM_001247
NM_001248
NM_001249
NM_001251
NM_001252
NM_001253
NM_001254
NM_001255
NM_001256
NM_001257
NM_001258
NM_001259
NM_001260
NM_001261
NM_001262
NM_001263
NM_001264
NM_001265
NM_001266
NM_001267
NM_001269
NM_001271
NM_001273
NM_001274
NM_001275
NM_001276
NM_001277
NM_001278
NM_001279
NM_001280
NM_001281
NM_001282
NM_001284
NM_001285
NM_001286
NM_001287
NM_001288
NM_001289
NM_001291
NM_001292
NM_001293
NM_001294
NM_001295
NM_001296
NM_001297
NM_001298
NM_001299
NM_001300
NM_001302
NM_001303
NM_001304
NM_001305
NM_001306
NM_001307
NM_001308
NM_001310
NM_001311
NM_001312
NM_001313
NM_001315
NM_001316
NM_001319
NM_001320
NM_001321
NM_001322
NM_001323
NM_001324
NM_001325
NM_001326
NM_001327
NM_001328
NM_001330
NM_001331
NM_001332
NM_001333
NM_001334
NM_001335
NM_001336
NM_001337
NM_001340
NM_001344
NM_001345
NM_001346
NM_001347
NM_001348
NM_001349
NM_001350
NM_001351
NM_001352
NM_001355
NM_001358
NM_001359
NM_001360
NM_001361
NM_001362
NM_001363
NM_001364
NM_001365
NM_001369
NM_001371
NM_001372
NM_001374
NM_001375
NM_001376
NM_001378
NM_001379
NM_001380
NM_001381
NM_001382
NM_001383
NM_001384
NM_001385
NM_001386
NM_001387
NM_001388
NM_001389
NM_001391
NM_001393
NM_001395
NM_001397
NM_001398
NM_001399
NM_001400
NM_001402
NM_001404
NM_001405
NM_001406
NM_001408
NM_001412
NM_001414
NM_001415
NM_001416
NM_001417
NM_001418
NM_001419
NM_001420
NM_001421
NM_001423
NM_001424
NM_001425
NM_001426
NM_001427
NM_001428
NM_001429
NM_001430
NM_001431
NM_001432
NM_001433
NM_001436
NM_001437
NM_001438
NM_001439
NM_001440
NM_001441
NM_001442
NM_001443
NM_001444
NM_001446
NM_001447
NM_001448
NM_001449
NM_001451
NM_001452
NM_001453
NM_001454
NM_001455
NM_001456
NM_001457
NM_001458
NM_001459
NM_001460
NM_001461
NM_001462
NM_001466
NM_001467
NM_001468
NM_001469
NM_001472
NM_001474
NM_001475
NM_001476
NM_001477
NM_001478
NM_001480
NM_001481
NM_001482
NM_001483
NM_001485
NM_001486
NM_001487
NM_001488
NM_001491
NM_001492
NM_001493
NM_001494
NM_001495
NM_001496
NM_001497
NM_001498
NM_001499
NM_001500
NM_001502
NM_001503
NM_001505
NM_001506
NM_001507
NM_001508
NM_001509
NM_001510
NM_001511
NM_001512
NM_001513
NM_001514
NM_001515
NM_001516
NM_001517
NM_001519
NM_001520
NM_001521
NM_001522
NM_001523
NM_001524
NM_001525
NM_001526
NM_001527
NM_001528
NM_001531
NM_001532
NM_001533
NM_001535
NM_001537
NM_001539
NM_001540
NM_001541
NM_001542
NM_001543
NM_001544
NM_001545
NM_001546
NM_001548
NM_001550
NM_001551
NM_001553
NM_001554
NM_001556
NM_001557
NM_001559
NM_001560
NM_001561
NM_001562
NM_001563
NM_001564
NM_001566
NM_001567
NM_001568
NM_001569
NM_001570
NM_001571
NM_001584
NM_001585
NM_001587
NM_001605
NM_001606
NM_001607
NM_001608
NM_001609
NM_001610
NM_001613
NM_001614
NM_001615
NM_001616
NM_001618
NM_001619
NM_001621
NM_001622
NM_001623
NM_001625
NM_001626
NM_001627
NM_001628
NM_001629
NM_001630
NM_001631
NM_001632
NM_001633
NM_001634
NM_001635
NM_001637
NM_001638
NM_001639
NM_001640
NM_001641
NM_001642
NM_001643
NM_001646
NM_001647
NM_001648
NM_001649
NM_001651
NM_001652
NM_001654
NM_001655
NM_001656
NM_001658
NM_001659
NM_001660
NM_001661
NM_001662
NM_001663
NM_001664
NM_001665
NM_001666
NM_001667
NM_001670
NM_001671
NM_001672
NM_001673
NM_001674
NM_001675
NM_001676
NM_001679
NM_001683
NM_001684
NM_001685
NM_001686
NM_001687
NM_001688
NM_001689
NM_001690
NM_001692
NM_001693
NM_001694
NM_001695
NM_001696
NM_001697
NM_001699
NM_001700
NM_001701
NM_001702
NM_001703
NM_001704
NM_001707
NM_001708
NM_001709
NM_001710
NM_001711
NM_001713
NM_001714
NM_001715
NM_001717
NM_001719
NM_001720
NM_001721
NM_001722
NM_001724
NM_001725
NM_001726
NM_001727
NM_001728
NM_001729
NM_001731
NM_001733
NM_001734
NM_001735
NM_001737
NM_001738
NM_001739
NM_001741
NM_001742
NM_001743
NM_001744
NM_001745
NM_001746
NM_001748
NM_001749
NM_001751
NM_001752
NM_001753
NM_001754
NM_001757
NM_001759
NM_001760
NM_001761
NM_001762
NM_001763
NM_001764
NM_001768
NM_001770
NM_001771
NM_001773
NM_001774
NM_001776
NM_001777
NM_001778
NM_001779
NM_001780
NM_001781
NM_001782
NM_001783
NM_001784
NM_001785
NM_001786
NM_001788
NM_001789
NM_001790
NM_001791
NM_001793
NM_001794
NM_001795
NM_001796
NM_001797
NM_001798
NM_001799
NM_001800
NM_001803
NM_001804
NM_001805
NM_001807
NM_001809
NM_001810
NM_001812
NM_001813
NM_001814
NM_001815
NM_001816
NM_001817
NM_001818
NM_001819
NM_001821
NM_001822
NM_001824
NM_001825
NM_001826
NM_001827
NM_001829
NM_001830
NM_001831
NM_001832
NM_001833
NM_001834
NM_001835
NM_001836
NM_001837
NM_001838
NM_001841
NM_001842
NM_001844
NM_001845
NM_001846
NM_001848
NM_001849
NM_001850
NM_001852
NM_001854
NM_001855
NM_001856
NM_001858
NM_001859
NM_001860
NM_001861
NM_001862
NM_001863
NM_001864
NM_001865
NM_001866
NM_001867
NM_001868
NM_001870
NM_001871
NM_001872
NM_001873
NM_001874
NM_001875
NM_001876
NM_001877
NM_001878
NM_001879
NM_001880
NM_001881
NM_001882
NM_001883
NM_001884
NM_001885
NM_001886
NM_001887
NM_001889
NM_001890
NM_001891
NM_001892
NM_001893
NM_001896
NM_001897
NM_001898
NM_001899
NM_001900
NM_001901
NM_001902
NM_001903
NM_001904
NM_001905
NM_001906
NM_001907
NM_001908
NM_001909
NM_001910
NM_001911
NM_001912
NM_001914
NM_001915
NM_001916
NM_001917
NM_001918
NM_001919
NM_001920
NM_001921
NM_001922
NM_001923
NM_001924
NM_001925
NM_001926
NM_001927
NM_001928
NM_001929
NM_001930
NM_001931
NM_001932
NM_001933
NM_001934
NM_001937
NM_001938
NM_001939
NM_001940
NM_001942
NM_001944
NM_001945
NM_001946
NM_001947
NM_001948
NM_001949
NM_001950
NM_001951
NM_001953
NM_001955
NM_001956
NM_001957
NM_001959
NM_001960
NM_001961
NM_001962
NM_001963
NM_001965
NM_001966
NM_001967
NM_001968
NM_001969
NM_001970
NM_001971
NM_001972
NM_001974
NM_001975
NM_001977
NM_001978
NM_001981
NM_001982
NM_001983
NM_001984
NM_001985
NM_001986
NM_001987
NM_001988
NM_001989
NM_001990
NM_001991
NM_001992
NM_001993
NM_001994
NM_001995
NM_001997
NM_001998
NM_002002
NM_002003
NM_002004
NM_002005
NM_002006
NM_002007
NM_002009
NM_002010
NM_002011
NM_002012
NM_002013
NM_002014
NM_002015
NM_002017
NM_002018
NM_002019
NM_002021
NM_002022
NM_002023
NM_002024
NM_002025
NM_002026
NM_002027
NM_002028
NM_002029
NM_002030
NM_002031
NM_002032
NM_002034
NM_002035
NM_002037
NM_002038
NM_002039
NM_002040
NM_002042
NM_002043
NM_002044
NM_002046
NM_002047
NM_002048
NM_002049
NM_002052
NM_002053
NM_002054
NM_002055
NM_002056
NM_002060
NM_002061
NM_002062
NM_002063
NM_002064
NM_002066
NM_002067
NM_002068
NM_002069
NM_002070
NM_002072
NM_002074
NM_002075
NM_002076
NM_002077
NM_002078
NM_002079
NM_002080
NM_002081
NM_002082
NM_002083
NM_002084
NM_002085
NM_002086
NM_002087
NM_002088
NM_002089
NM_002090
NM_002091
NM_002092
NM_002093
NM_002094
NM_002095
NM_002096
NM_002097
NM_002098
NM_002099
NM_002100
NM_002103
NM_002104
NM_002105
NM_002106
NM_002107
NM_002108
NM_002109
NM_002110
NM_002111
NM_002112
NM_002113
NM_002114
NM_002116
NM_002117
NM_002118
NM_002120
NM_002121
NM_002123
NM_002126
NM_002127
NM_002128
NM_002129
NM_002130
NM_002134
NM_002135
NM_002136
NM_002137
NM_002138
NM_002139
NM_002141
NM_002142
NM_002143
NM_002144
NM_002145
NM_002146
NM_002147
NM_002148
NM_002150
NM_002151
NM_002152
NM_002153
NM_002154
NM_002156
NM_002157
NM_002158
NM_002159
NM_002160
NM_002161
NM_002162
NM_002163
NM_002164
NM_002165
NM_002167
NM_002168
NM_002169
NM_002170
NM_002171
NM_002172
NM_002173
NM_002175
NM_002176
NM_002177
NM_002178
NM_002180
NM_002182
NM_002185
NM_002187
NM_002190
NM_002191
NM_002192
NM_002193
NM_002194
NM_002195
NM_002196
NM_002197
NM_002198
NM_002200
NM_002201
NM_002202
NM_002203
NM_002204
NM_002205
NM_002206
NM_002207
NM_002208
NM_002209
NM_002210
NM_002211
NM_002213
NM_002214
NM_002216
NM_002217
NM_002218
NM_002220
NM_002222
NM_002223
NM_002224
NM_002225
NM_002226
NM_002227
NM_002228
NM_002229
NM_002230
NM_002231
NM_002232
NM_002233
NM_002234
NM_002235
NM_002236
NM_002238
NM_002239
NM_002240
NM_002241
NM_002242
NM_002245
NM_002246
NM_002247
NM_002248
NM_002249
NM_002250
NM_002251
NM_002252
NM_002253
NM_002254
NM_002255
NM_002256
NM_002257
NM_002258
NM_002259
NM_002260
NM_002261
NM_002262
NM_002264
NM_002265
NM_002267
NM_002268
NM_002269
NM_002270
NM_002271
NM_002272
NM_002273
NM_002274
NM_002275
NM_002276
NM_002277
NM_002278
NM_002279
NM_002280
NM_002281
NM_002283
NM_002284
NM_002285
NM_002289
NM_002290
NM_002291
NM_002292
NM_002293
NM_002295
NM_002296
NM_002297
NM_002298
NM_002299
NM_002300
NM_002301
NM_002302
NM_002303
NM_002305
NM_002307
NM_002308
NM_002309
NM_002310
NM_002312
NM_002313
NM_002314
NM_002315
NM_002316
NM_002317
NM_002318
NM_002319
NM_002332
NM_002333
NM_002335
NM_002336
NM_002337
NM_002338
NM_002339
NM_002340
NM_002343
NM_002344
NM_002345
NM_002346
NM_002347
NM_002348
NM_002349
NM_002350
NM_002353
NM_002355
NM_002356
NM_002357
NM_002358
NM_002359
NM_002360
NM_002361
NM_002362
NM_002363
NM_002364
NM_002365
NM_002367
NM_002370
NM_002372
NM_002373
NM_002375
NM_002376
NM_002377
NM_002378
NM_002379
NM_002380
NM_002381
NM_002383
NM_002385
NM_002386
NM_002387
NM_002388
NM_002390
NM_002392
NM_002393
NM_002394
NM_002396
NM_002397
NM_002398
NM_002399
NM_002401
NM_002402
NM_002403
NM_002404
NM_002405
NM_002406
NM_002407
NM_002410
NM_002411
NM_002413
NM_002415
NM_002417
NM_002418
NM_002419
NM_002420
NM_002421
NM_002422
NM_002424
NM_002425
NM_002426
NM_002427
NM_002430
NM_002431
NM_002433
NM_002434
NM_002435
NM_002436
NM_002437
NM_002438
NM_002439
NM_002440
NM_002441
NM_002442
NM_002443
NM_002444
NM_002446
NM_002447
NM_002448
NM_002449
NM_002451
NM_002452
NM_002453
NM_002455
NM_002456
NM_002457
NM_002460
NM_002461
NM_002462
NM_002465
NM_002466
NM_002467
NM_002469
NM_002470
NM_002471
NM_002472
NM_002473
NM_002474
NM_002475
NM_002476
NM_002477
NM_002478
NM_002479
NM_002480
NM_002484
NM_002485
NM_002486
NM_002488
NM_002489
NM_002490
NM_002491
NM_002492
NM_002494
NM_002495
NM_002496
NM_002497
NM_002498
NM_002499
NM_002500
NM_002501
NM_002502
NM_002503
NM_002504
NM_002505
NM_002506
NM_002507
NM_002508
NM_002509
NM_002510
NM_002511
NM_002512
NM_002513
NM_002514
NM_002516
NM_002517
NM_002518
NM_002519
NM_002520
NM_002521
NM_002523
NM_002524
NM_002525
NM_002527
NM_002528
NM_002529
NM_002530
NM_002531
NM_002532
NM_002533
NM_002535
NM_002537
NM_002538
NM_002539
NM_002540
NM_002541
NM_002544
NM_002545
NM_002547
NM_002548
NM_002550
NM_002551
NM_002553
[truncated: 14,975 more rows]
